# Supplementary material for: Synthesis of nisin AB dicarba analogs using ring-closing metathesis: influence of sp3versus sp2hybridization of the α-carbon atom of residues dehydrobutyrine-2 and dehydroalanine-5 on the lipid II binding affinity
Source: Royal Society of Chemistry journal article supplement (doi:10.1039/c5ob00336a), 2015-01-01

**Synthesis of nisin AB dicarba analogs using ring-closing metathesis: Influence of  $sp^3$  versus  $sp^2$  hybridization of the  $\alpha$ -carbon atom of residues dehydrobutyrine-2 and dehydroalanine-5 on lipid II binding affinity**

Jack C. Slootweg<sup>a</sup>, Eric F. van Herwerden<sup>a</sup>, Mark F. M. van Doremalen<sup>a</sup>, Eefjan Breukink<sup>b</sup>, Rob M. J. Liskamp<sup>a,c</sup> and Dirk T. S. Rijkers<sup>a\*</sup>

<sup>a</sup>Medicinal Chemistry and Chemical Biology, Utrecht Institute for Pharmaceutical Sciences, Department of Pharmaceutical Sciences, Faculty of Science, Utrecht University, P.O. Box 80082, 3508 TB Utrecht, The Netherlands

<sup>b</sup>Membrane Biochemistry & Biophysics, Bijvoet Center for Biomolecular Research, Department of Chemistry, Faculty of Science, Utrecht University, Utrecht, The Netherlands

<sup>c</sup>Chemical Biology and Medicinal Chemistry, School of Chemistry, University of Glasgow, Glasgow, G12 8QQ, United Kingdom

\*Corresponding author. Tel.: +31 (0)6 2026 0572 / +31 (0)30 253 7307; fax: +31 (0)30 253 6655.

E-mail address: D.T.S.Rijkers@uu.nl (D.T.S. Rijkers).

**Contents**

|                                                                                |    |
|--------------------------------------------------------------------------------|----|
| 1. Synthesis and analysis of Cbz-D-Alg-OH                                      | 2  |
| 2. <sup>1</sup> H and <sup>13</sup> C NMR Spectra of Compounds <b>4-9</b>      | 4  |
| 3. HPLC Chromatograms of Compounds <b>1-3, 10-12, 16-21, and 23-25</b>         | 16 |
| 4. ESI-MS Spectra of Compounds <b>1-6, 8-12, 16-21, and 23-25</b>              | 24 |
| 5. LCMS Spectra of Compounds <b>4-6, 8, and 9</b>                              | 38 |
| 6. LCMS Spectra of Compounds <b>21A-B</b> to monitor the dehydration reactions | 43 |

## 1. Synthesis and analysis of Cbz-D-Alg-OH

**Synthesis of Cbz-D-Alg-OH.** H-D-Alg-OH (1.13 g, 10 mmol) was dissolved in aq. 2M NaOH (5 mL) and the solution was vigorously stirred. Then, benzyl chloroformate (1.71 mL, 12 mmol) and aq. 2M NaOH (5.5 mL) were simultaneously added dropwise for 2 h to the reaction mixture and stirring was continued at room temperature for 16 h. Then, CH<sub>2</sub>Cl<sub>2</sub> (15 mL) was added to the reaction mixture which was acidified with aq. 1N HCl until pH 1–2. The aqueous layer was extracted with CH<sub>2</sub>Cl<sub>2</sub> (2 × 10 mL), dried (Na<sub>2</sub>SO<sub>4</sub>) and concentrated *in vacuo* affording Cbz-D-Alg-OH as a colorless oil in a good yield of 79% (1.97 g). *R<sub>f</sub>* 0.75 (CHCl<sub>3</sub>/MeOH/AcOH 90:9:1 v/v/v); <sup>1</sup>H NMR (300 MHz, CDCl<sub>3</sub>) δ = 2.34-2.76 (m, 2H, CβH<sub>2</sub>), 4.49 (dd (*J<sub>gem</sub>* = 13.0 Hz, *J<sub>vic</sub>* 6.0 Hz), 1H, CαH), 5.03-5.23 (m, 4H, CδH<sub>2</sub> alkene / OCH<sub>2</sub> benzyl), 5.32 (d (*J* = 7.9 Hz), 1H, NH), 5.55-5.94 (m, 1H, CγH alkene), 7.33 (m, 5H, Ar-H benzyl), 9.47 (s, 1H, COOH); <sup>13</sup>C NMR (75.5 MHz, CDCl<sub>3</sub>) δ = 36.3, 53.1, 67.2, 119.8, 128.1, 128.3, 128.5, 132.7, 136.0, 156, 176.4.

<sup>1</sup>H NMR spectrum of Cbz-D-Alg-OH (300 MHz, CDCl<sub>3</sub>, *T* 298 K):

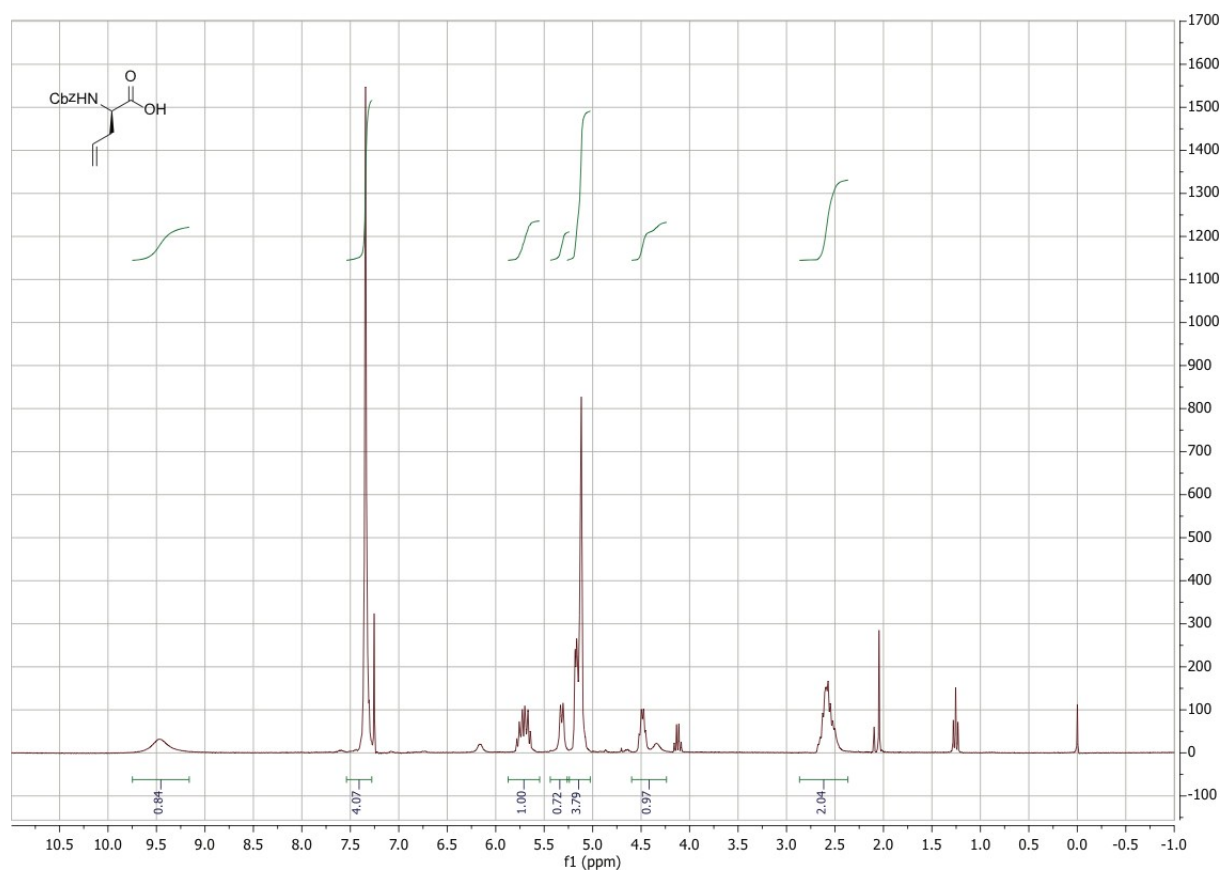

$^{13}\text{C}$  NMR spectrum of Cbz-D-Alg-OH (75.5 MHz,  $\text{CDCl}_3$ ,  $T$  298 K):

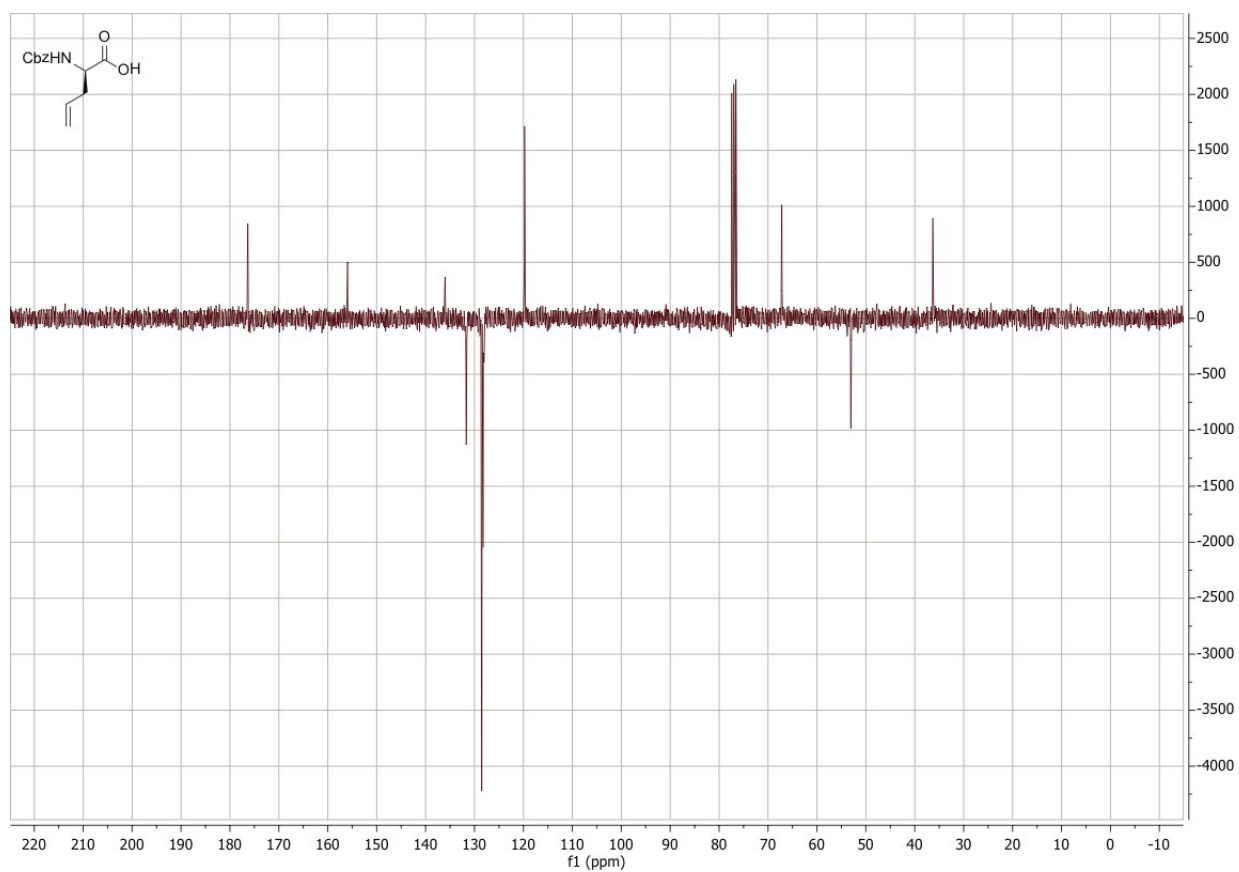

## 2. <sup>1</sup>H and <sup>13</sup>C NMR Spectra of Compounds 4-9.

<sup>1</sup>H NMR spectrum of compound **4** (300 MHz, CDCl<sub>3</sub>, T 298 K):

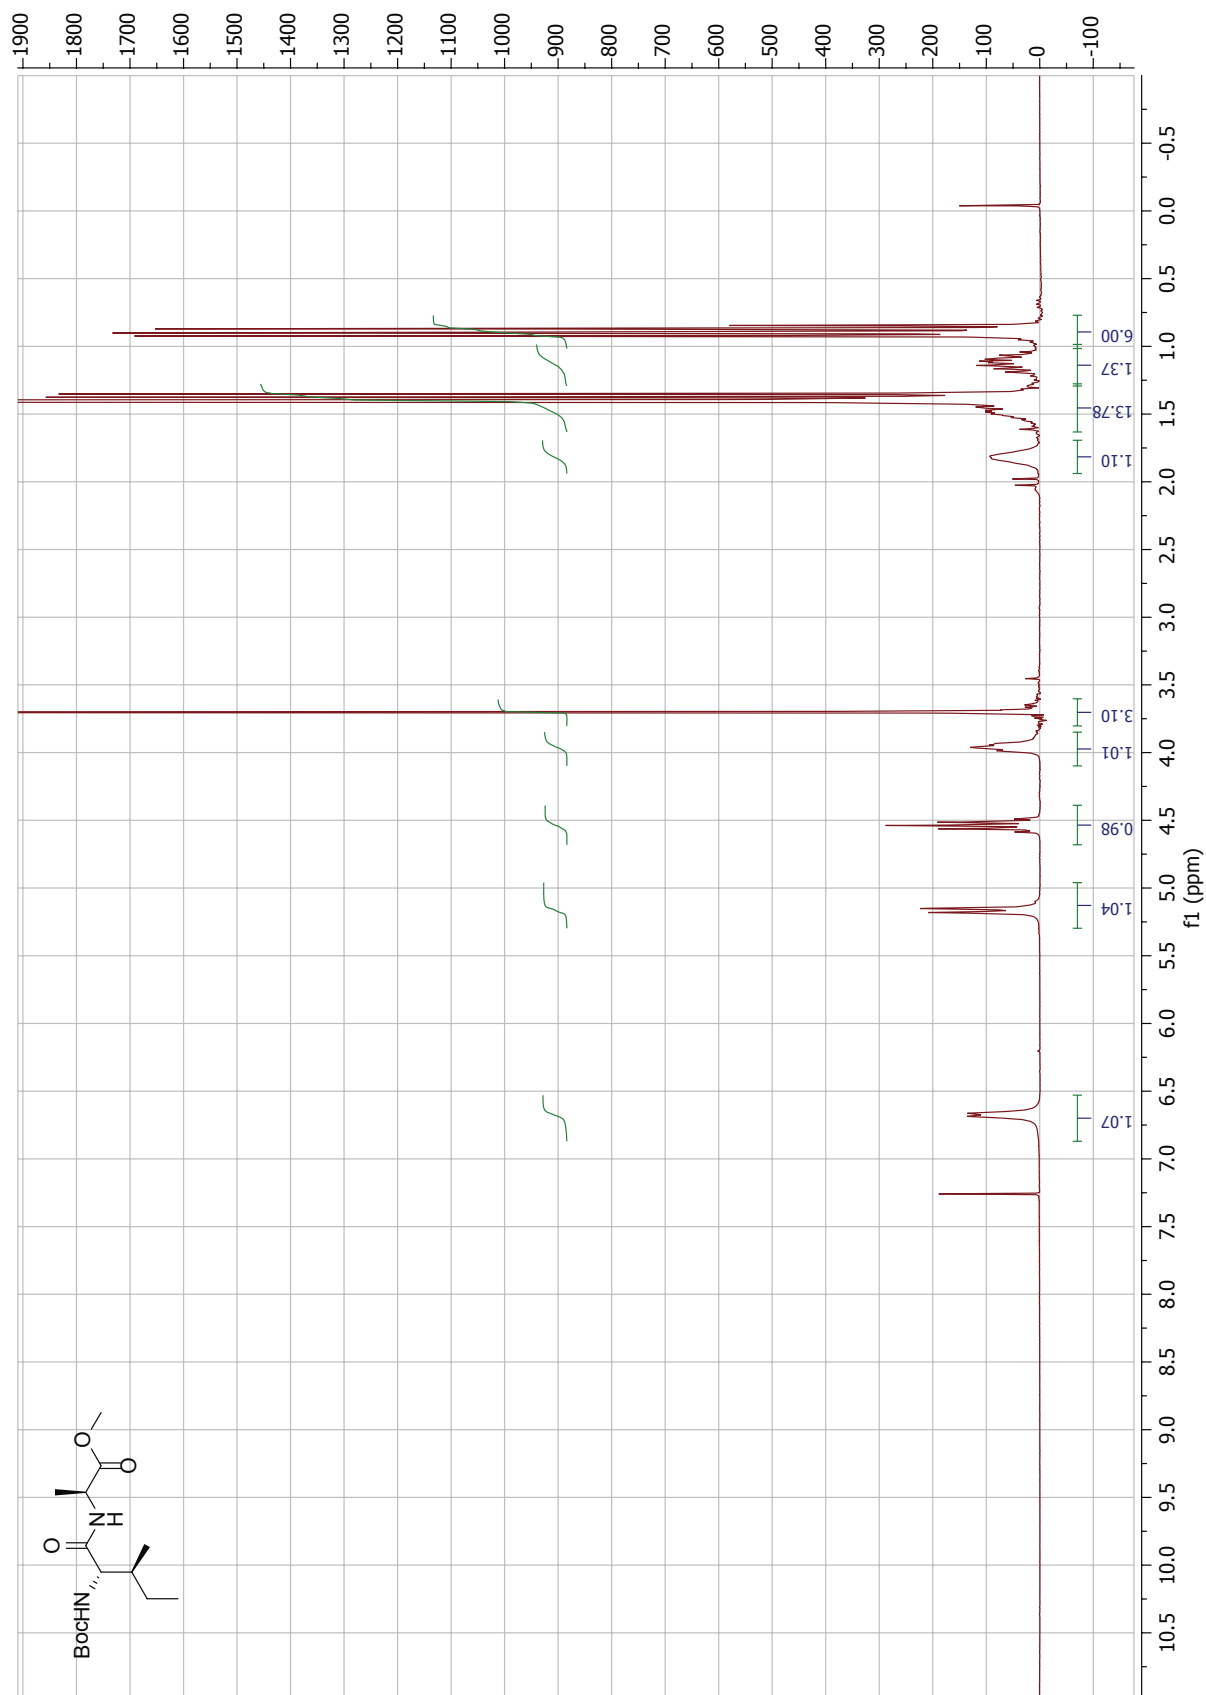

$^{13}\text{C}$  NMR spectrum of compound 4 (75.5 MHz,  $\text{CDCl}_3$ ,  $T$  298K):

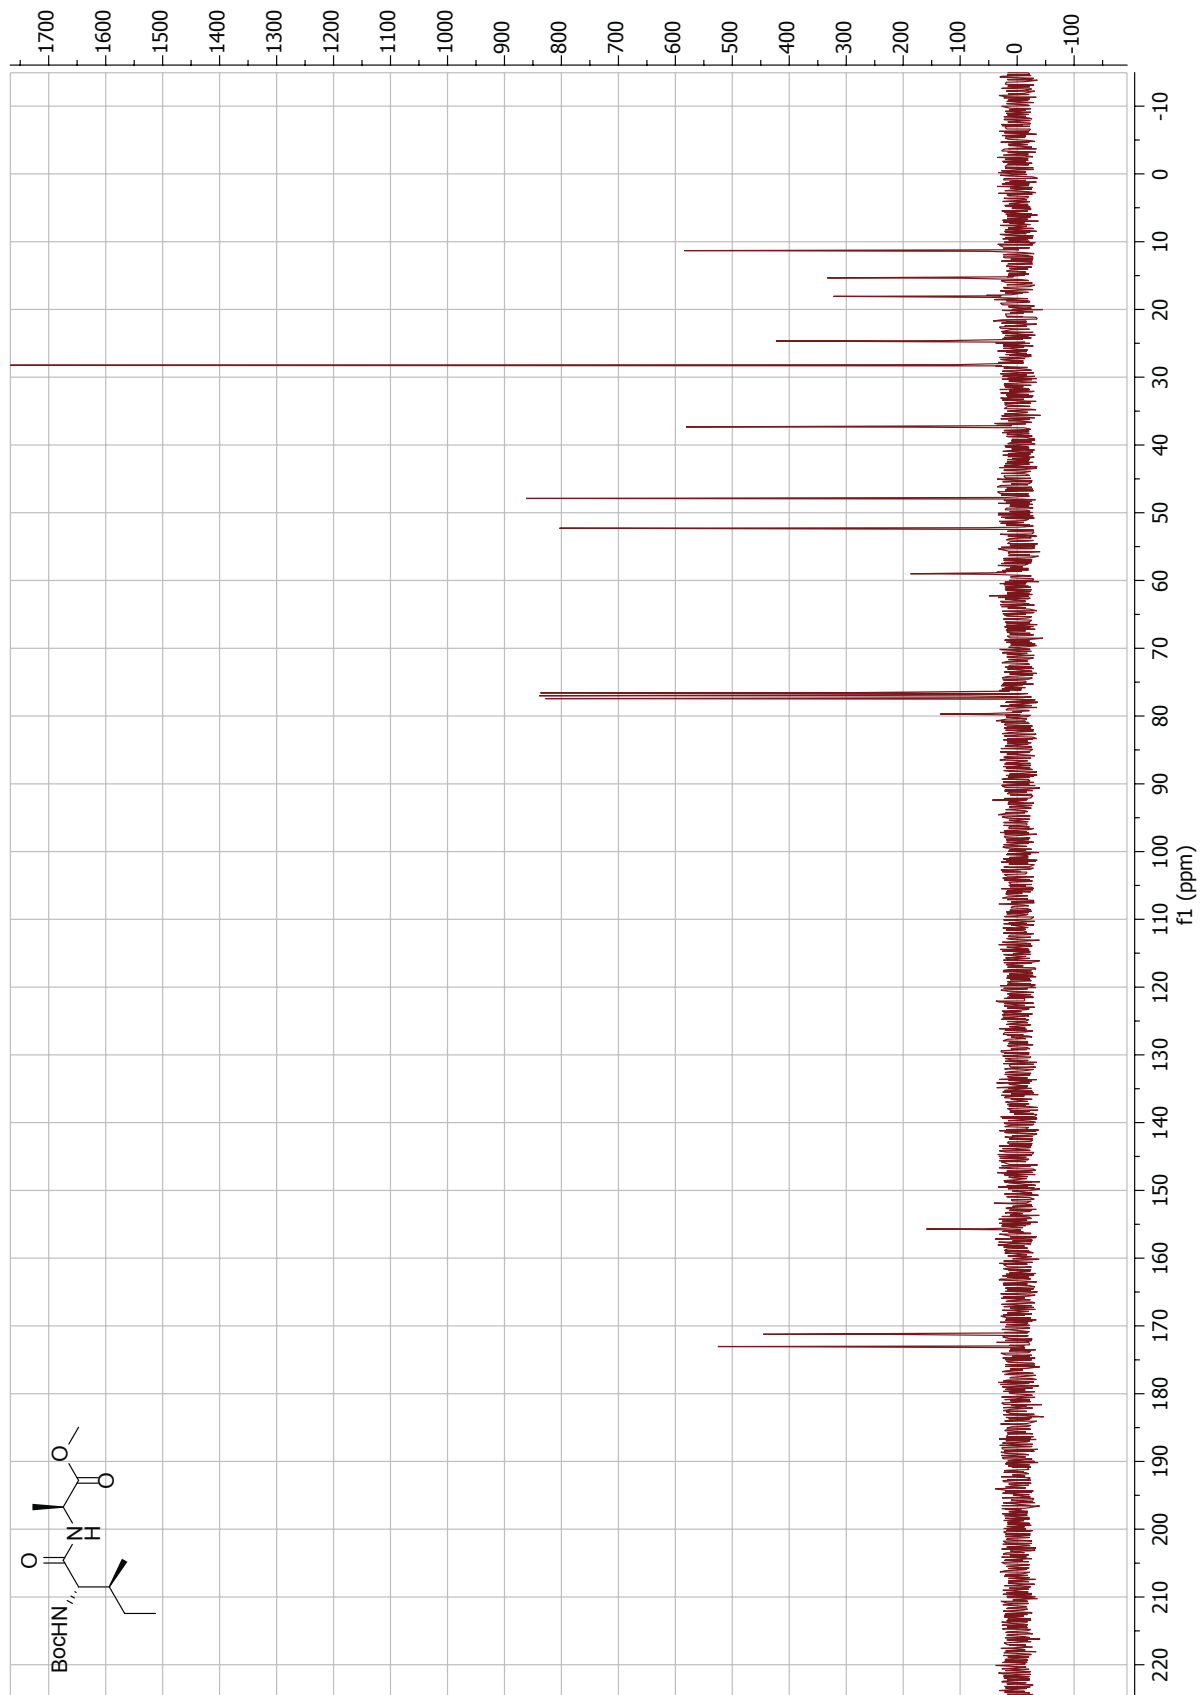

$^1\text{H}$  NMR spectrum of compound **5** (300 MHz,  $\text{CDCl}_3$ ,  $T$  298K):

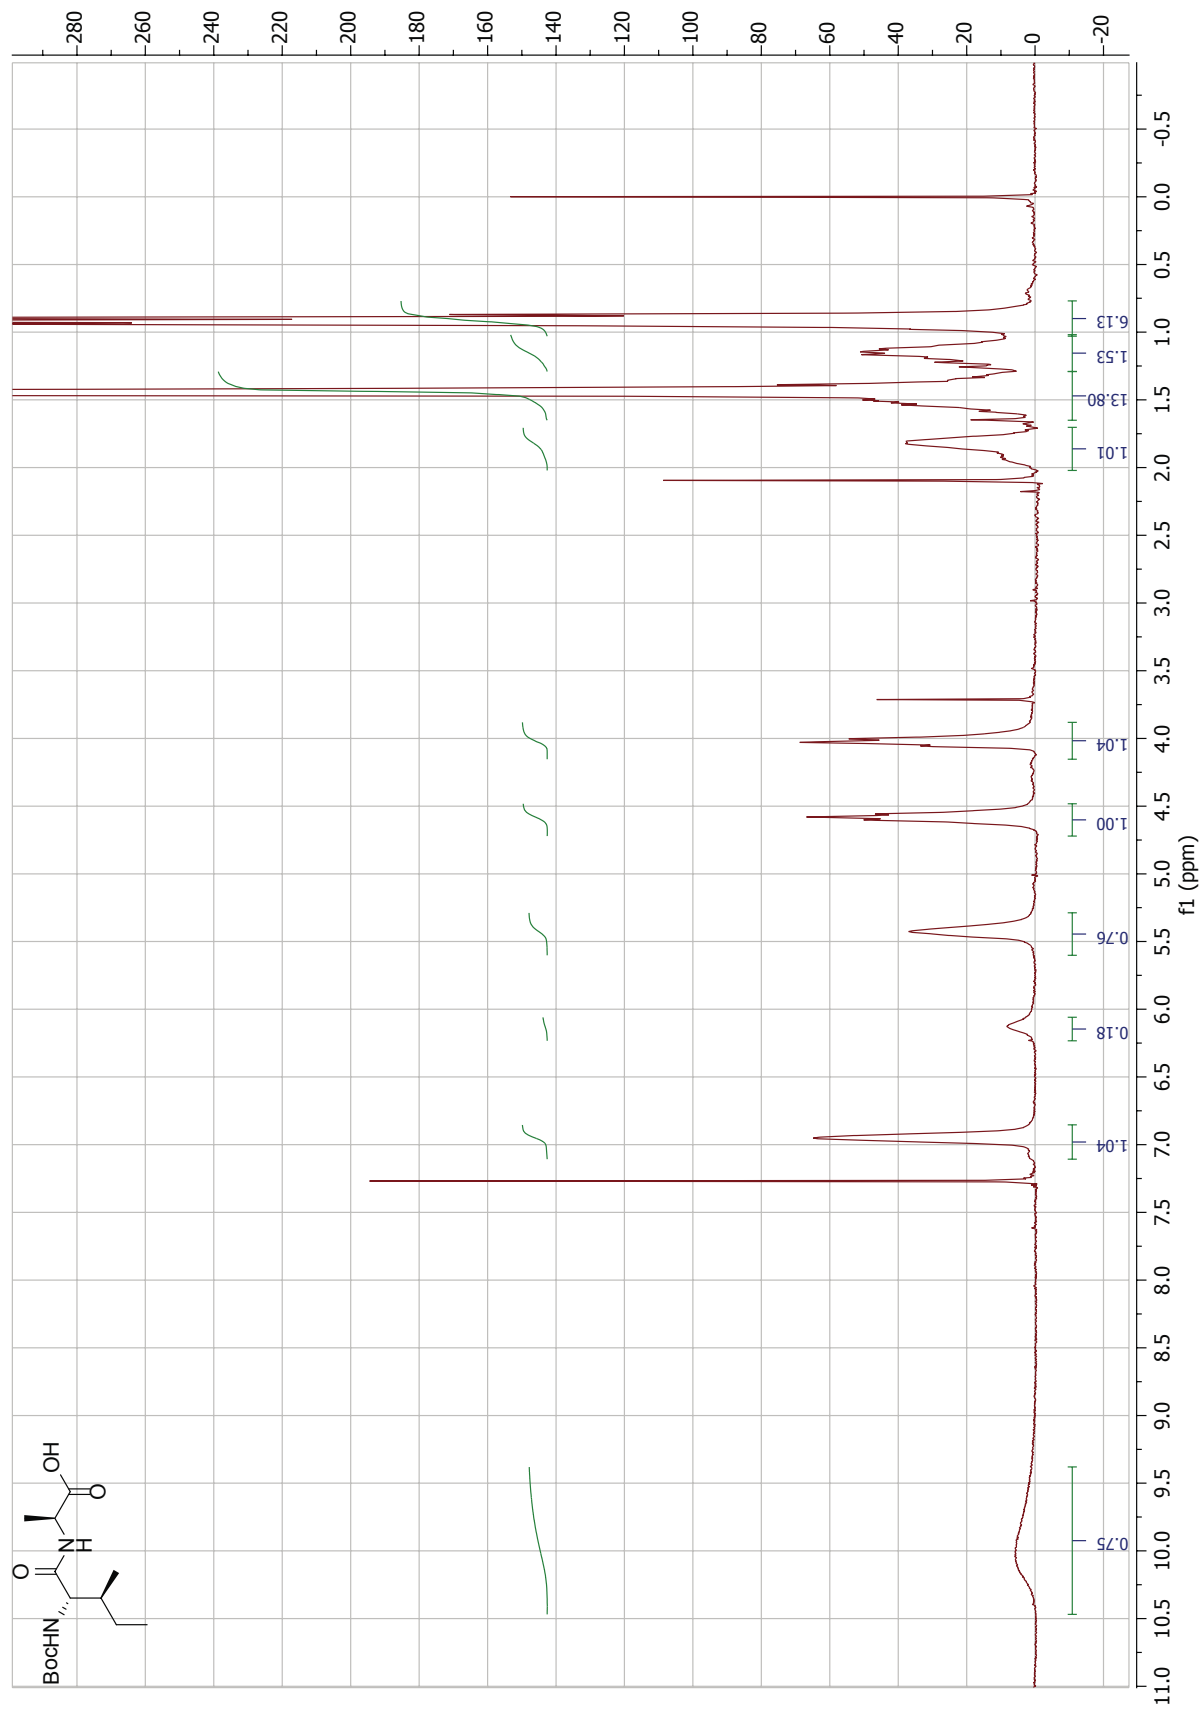

$^{13}\text{C}$  NMR spectrum of compound **5** (75.5 MHz,  $\text{CDCl}_3$ ,  $T$  298K):

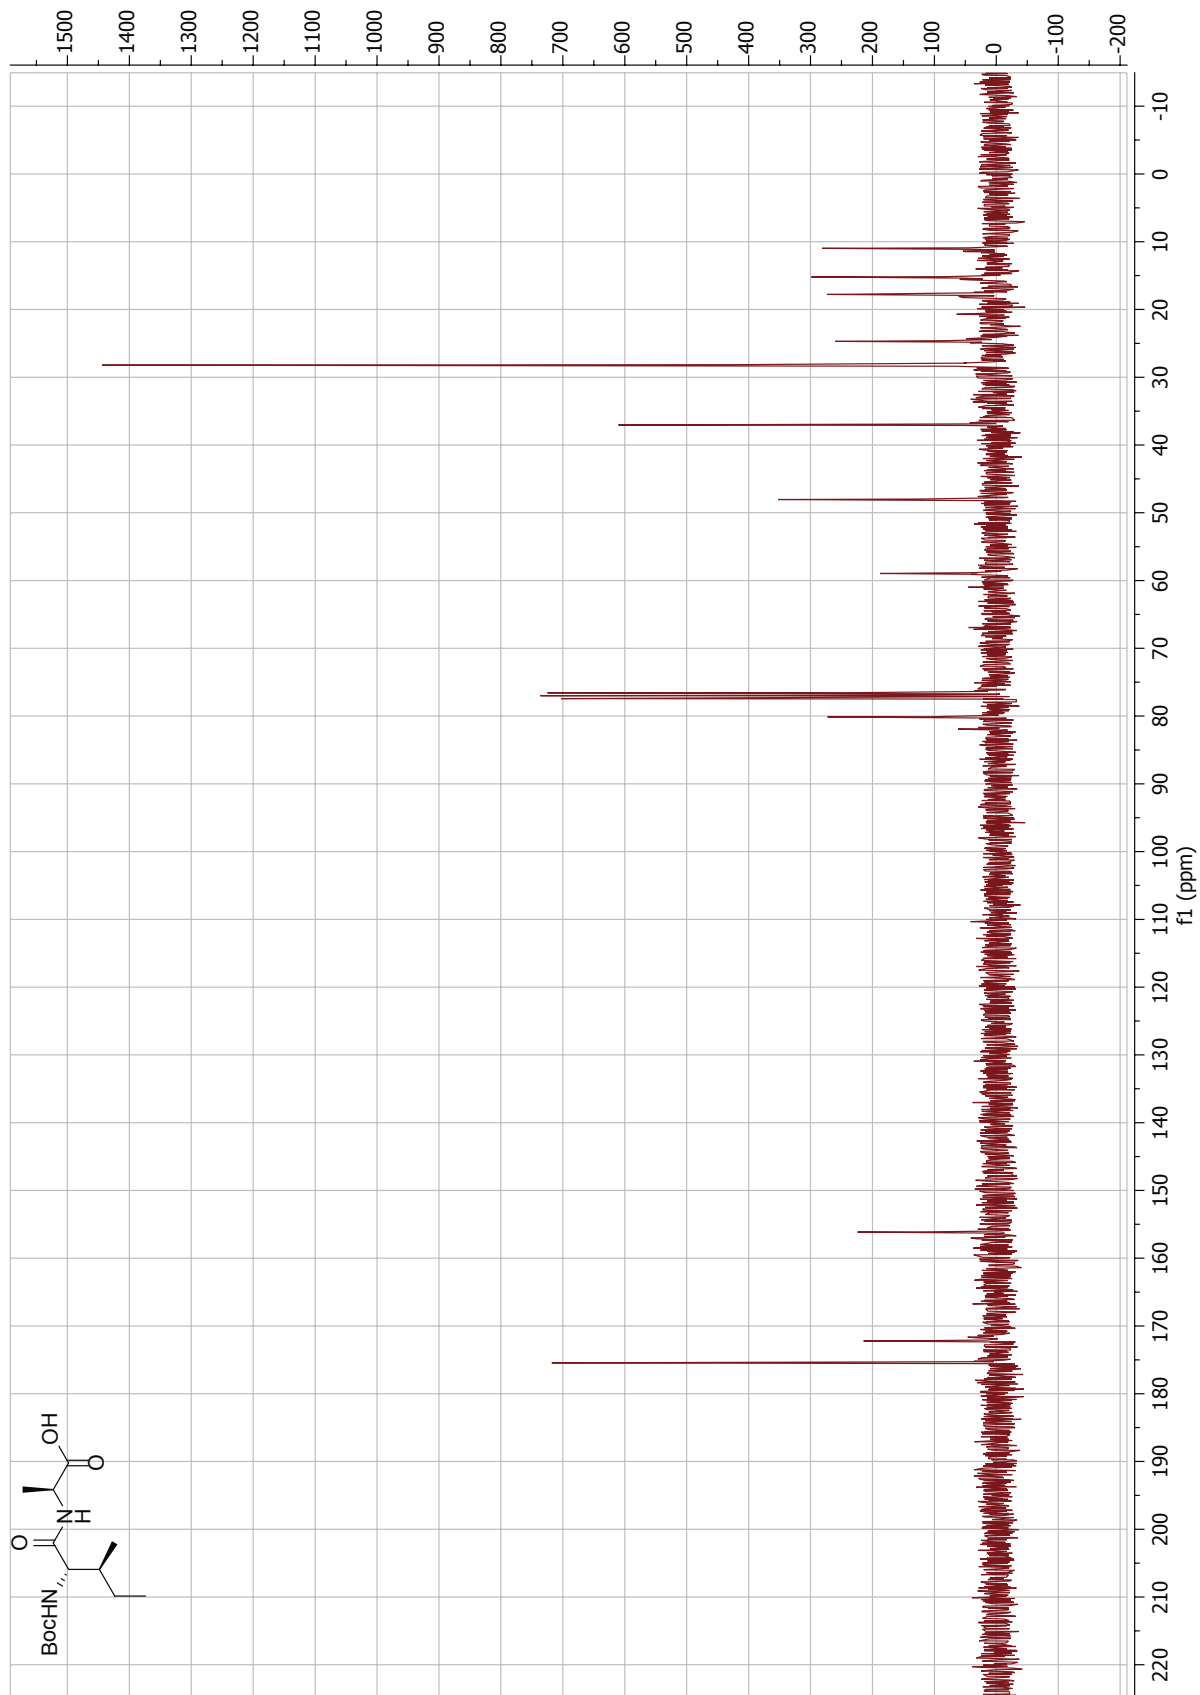

$^1\text{H}$  spectrum of compound **6** (300 MHz,  $\text{CDCl}_3$ ,  $T$  298K):

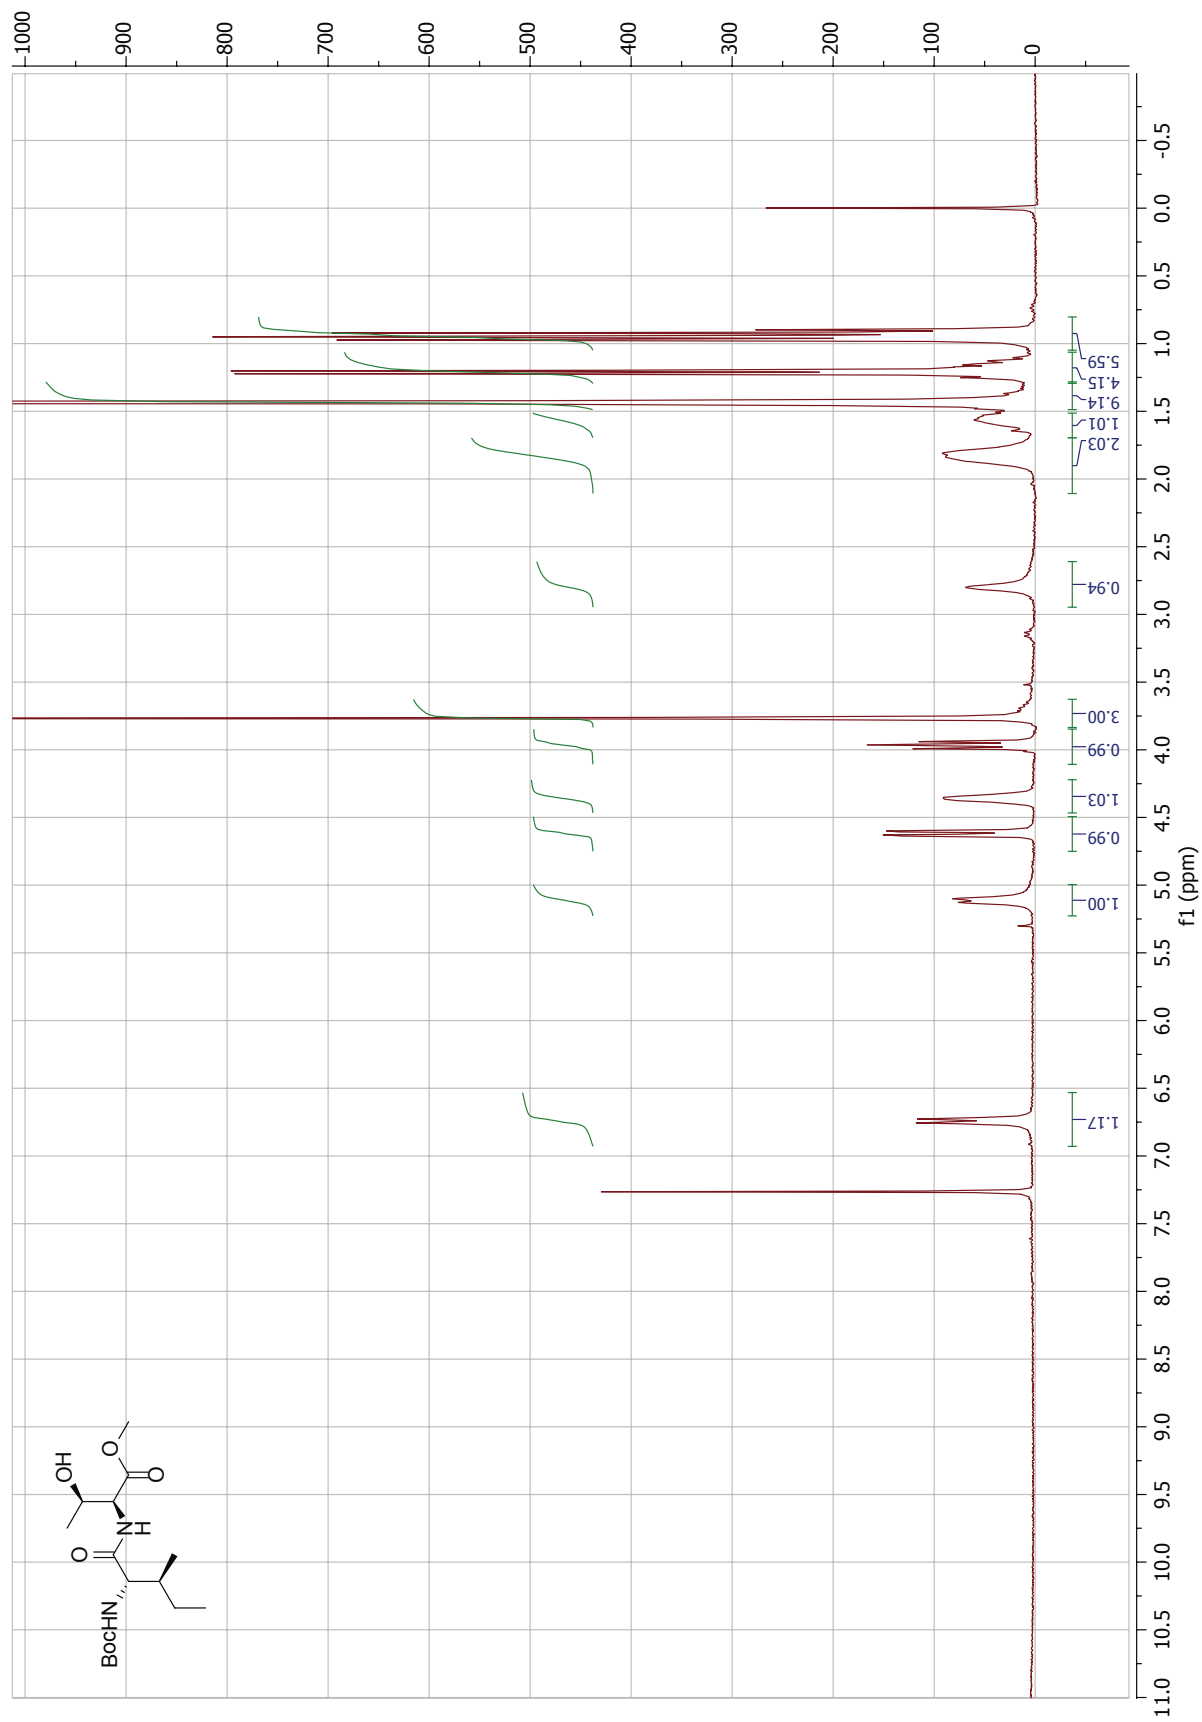



$^{13}\text{C}$  NMR (APT) spectrum of compound **6** (75.5 MHz,  $\text{CDCl}_3$ ,  $T$  298K):

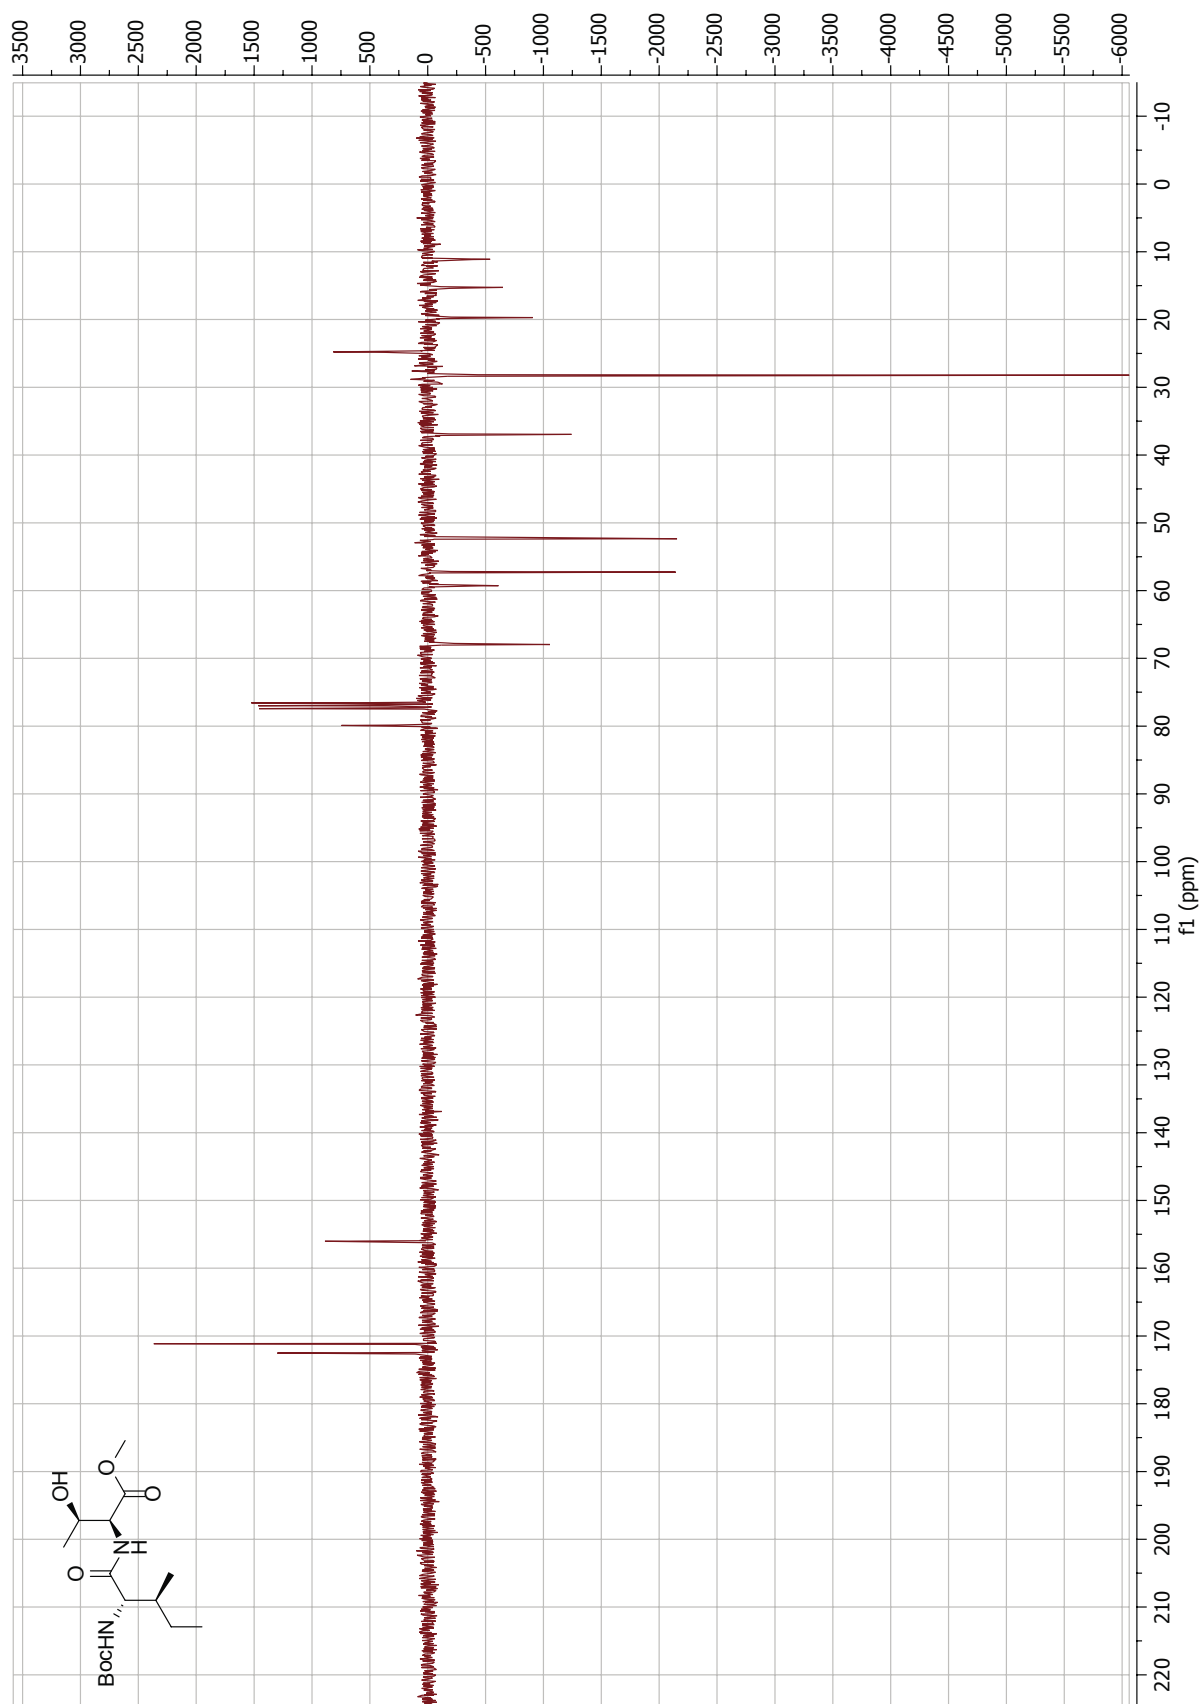

<sup>1</sup>H NMR spectrum of compound **7** (300 MHz, CDCl<sub>3</sub>, T 298K):

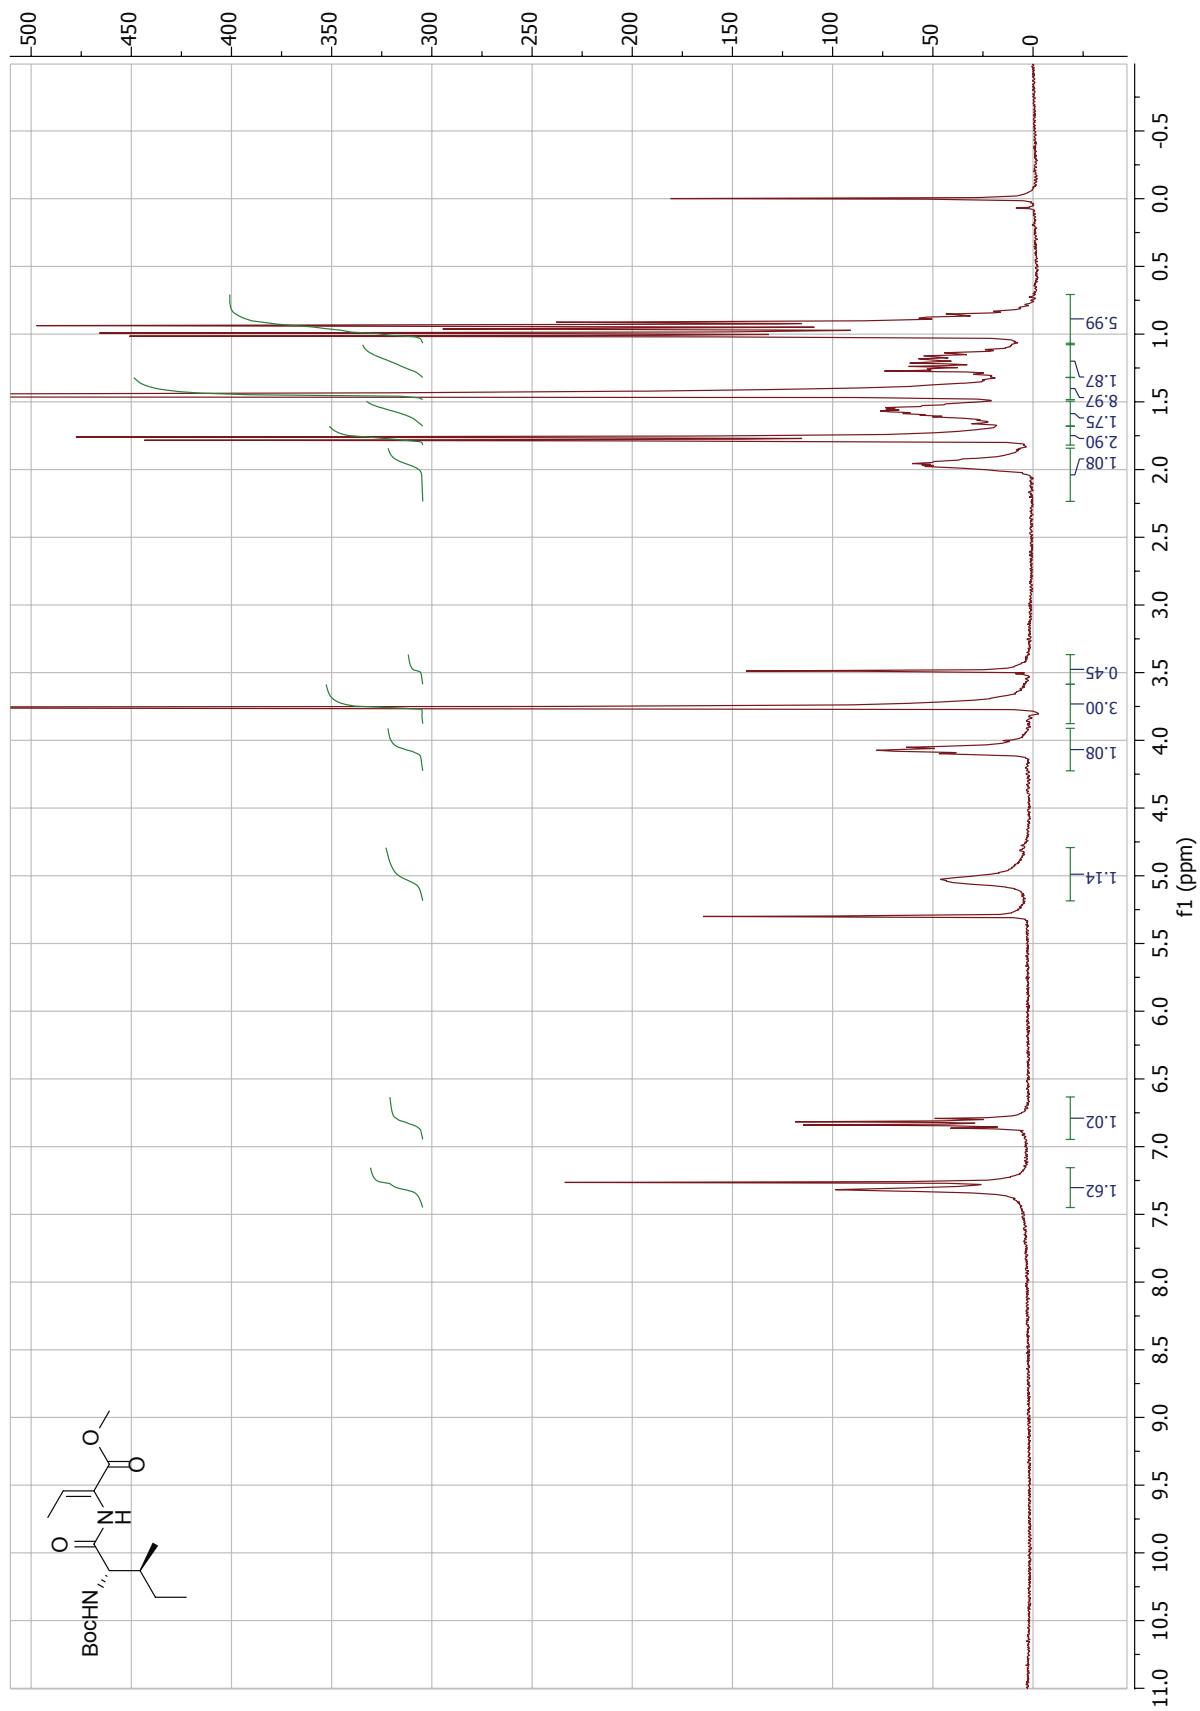

$^{13}\text{C}$  NMR spectrum of compound **7** (75.5 MHz,  $\text{CDCl}_3$ ,  $T$  298K):

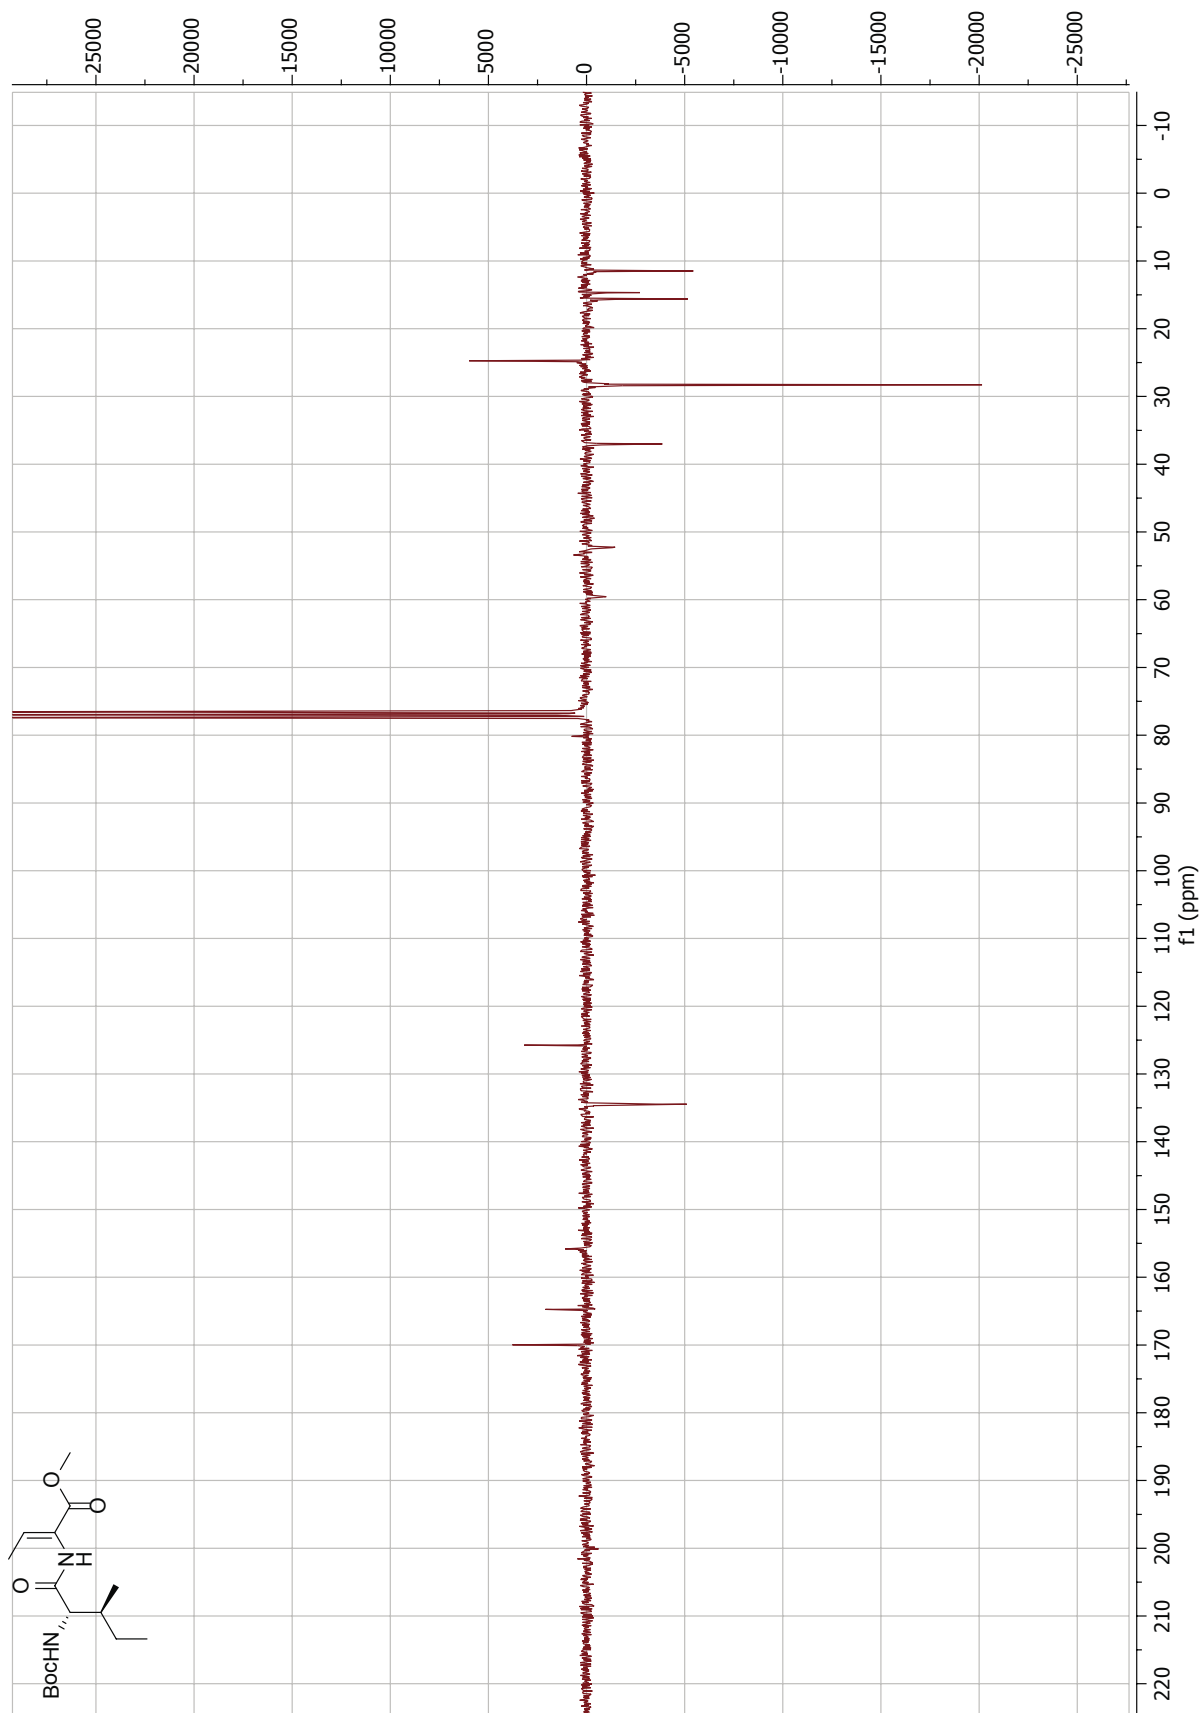

<sup>1</sup>H NMR spectrum of compound **8** (300 MHz, CDCl<sub>3</sub>/CD<sub>3</sub>OD 95:5 v/v, T 298K):

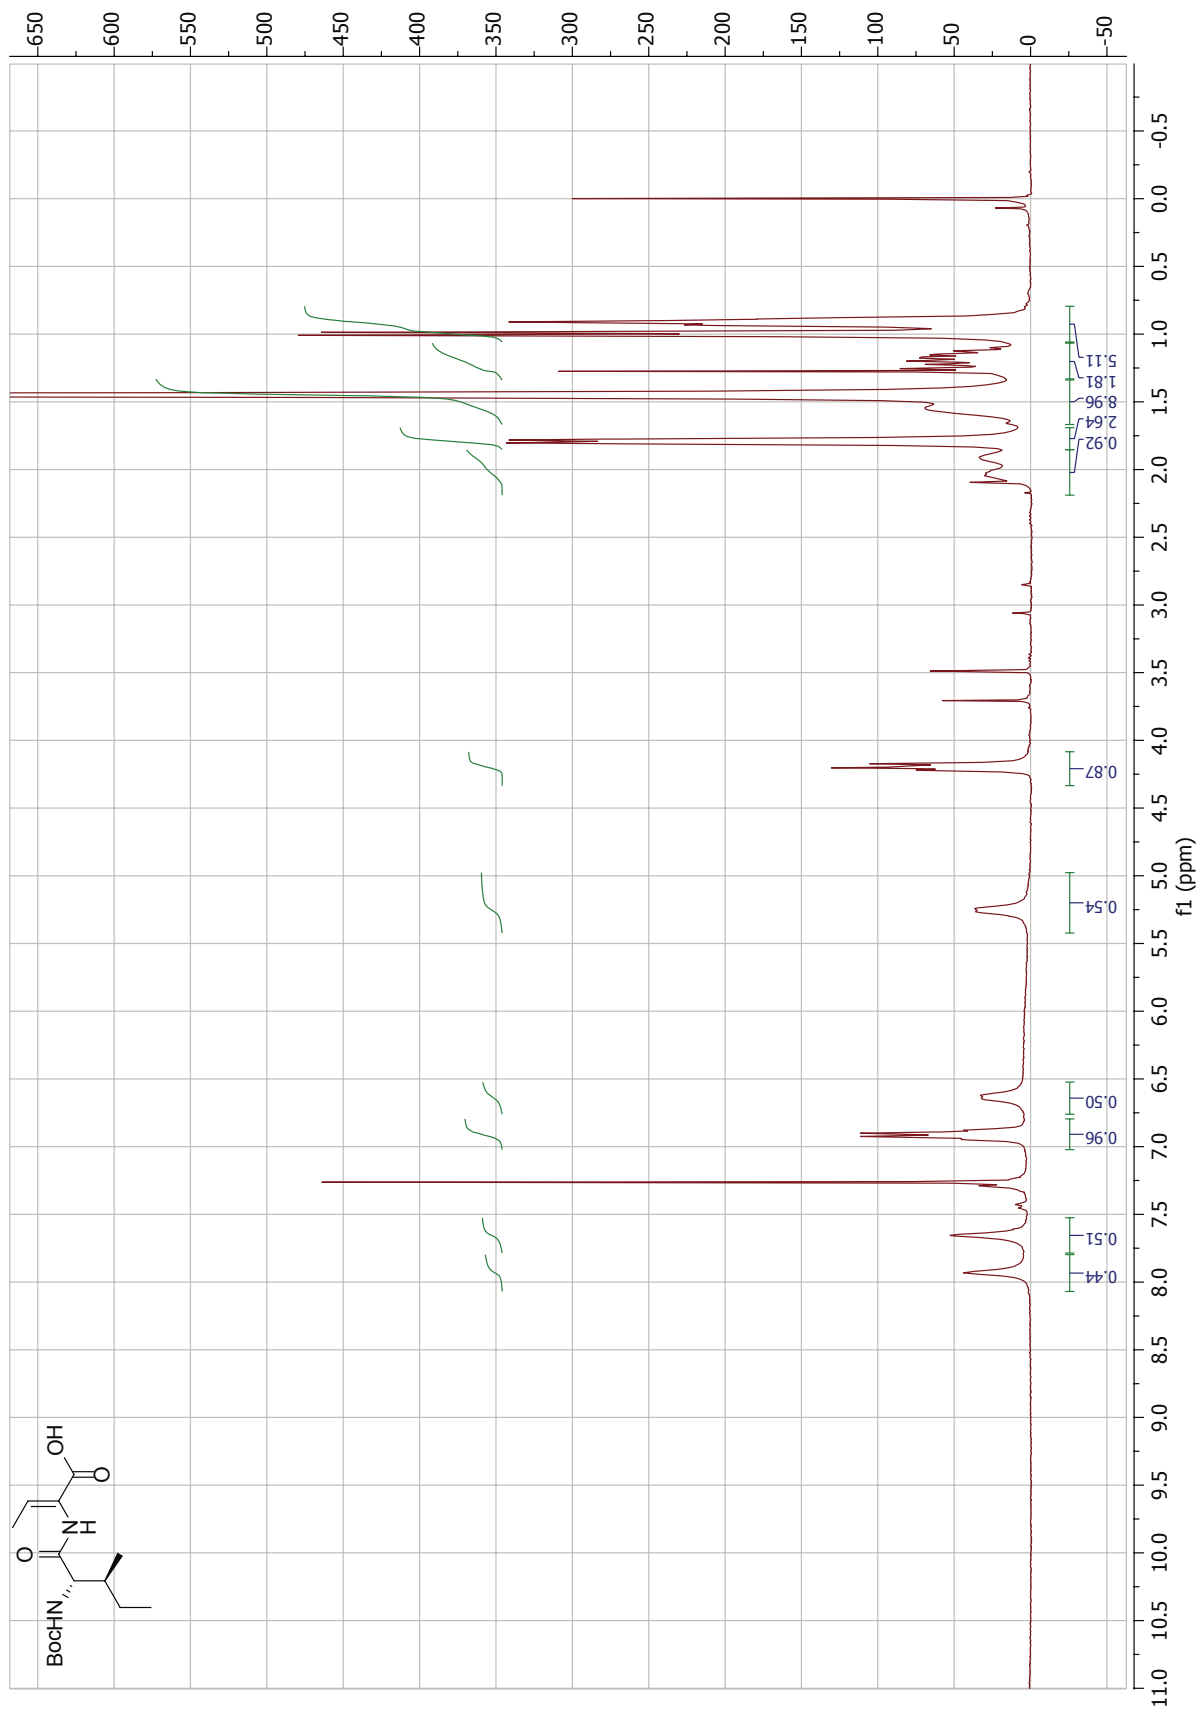

$^{13}\text{C}$  NMR spectrum of compound **8** (75.5 MHz,  $\text{CDCl}_3/\text{CD}_3\text{OD}$  95:5 v/v,  $T$  298K):

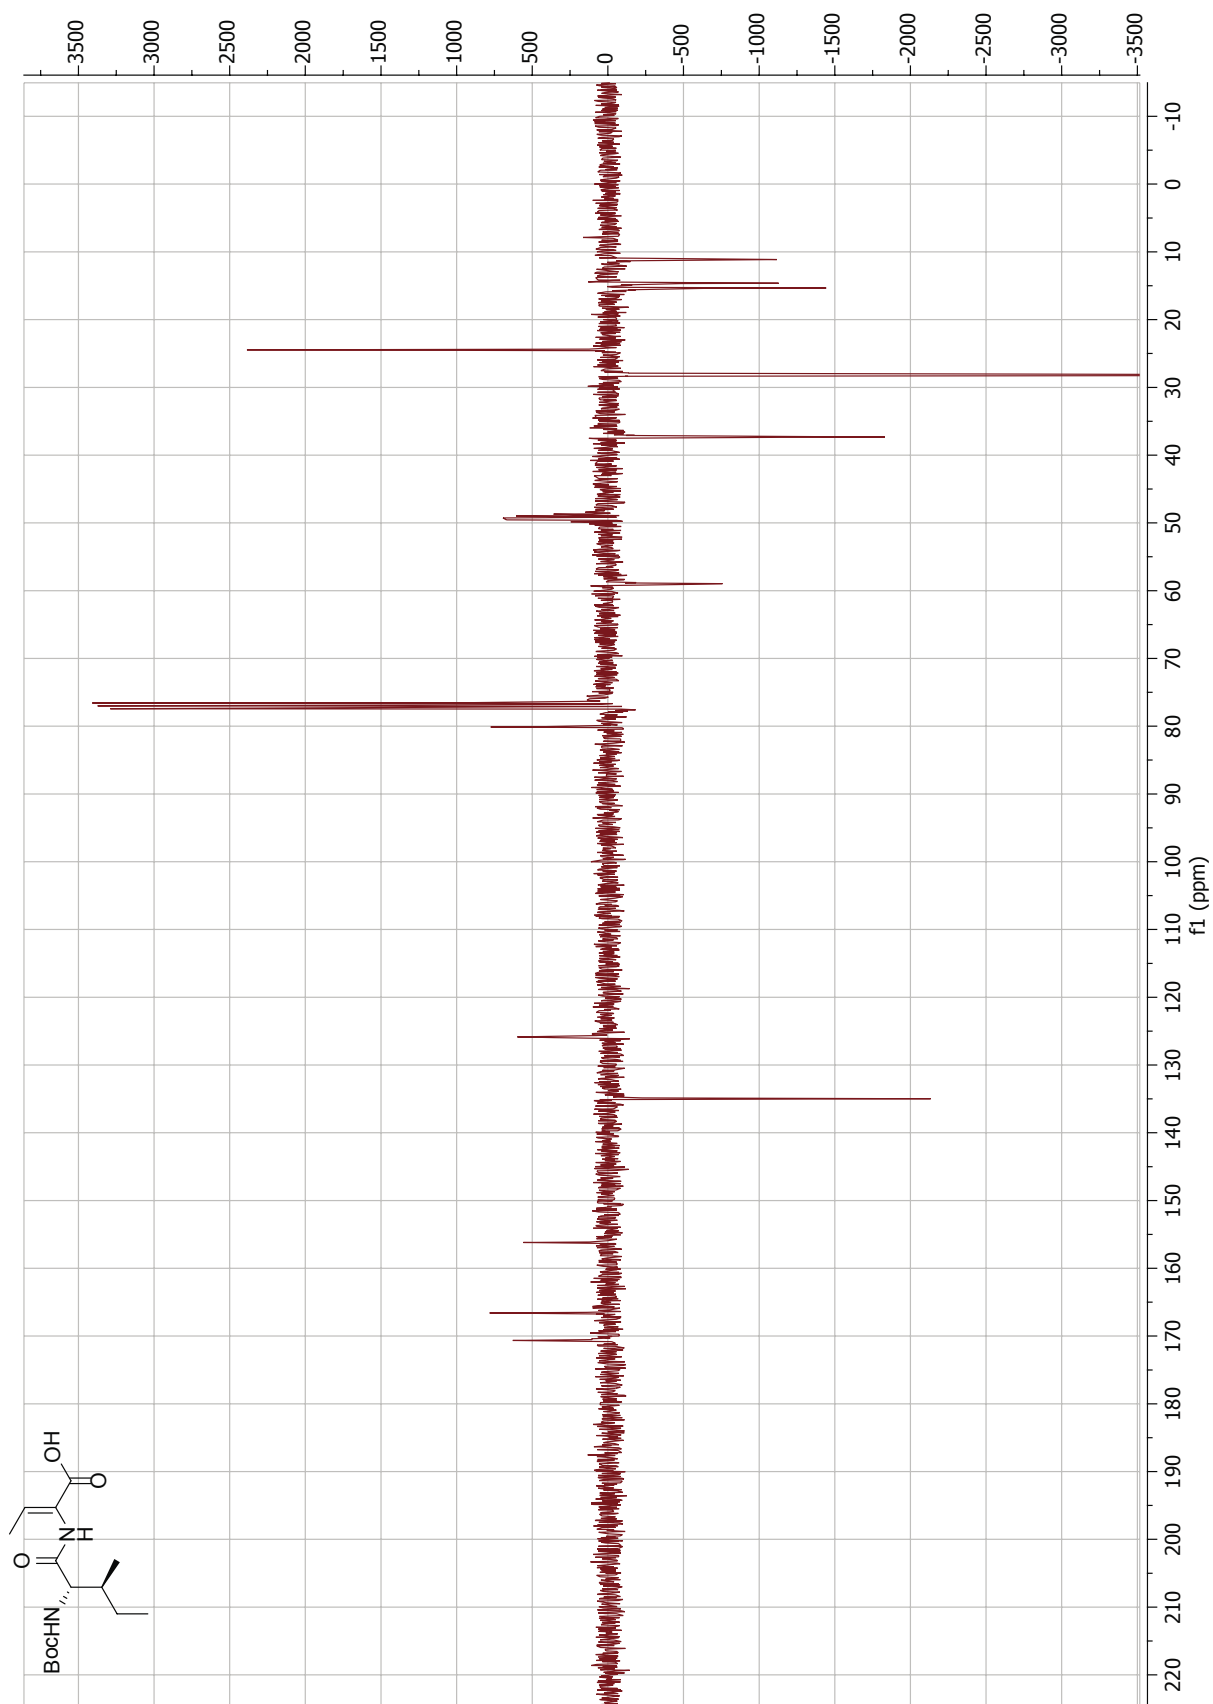

<sup>1</sup>H NMR spectrum of compound **9** (300 MHz, CDCl<sub>3</sub>/CD<sub>3</sub>OD 99:1 v/v, T 298K):

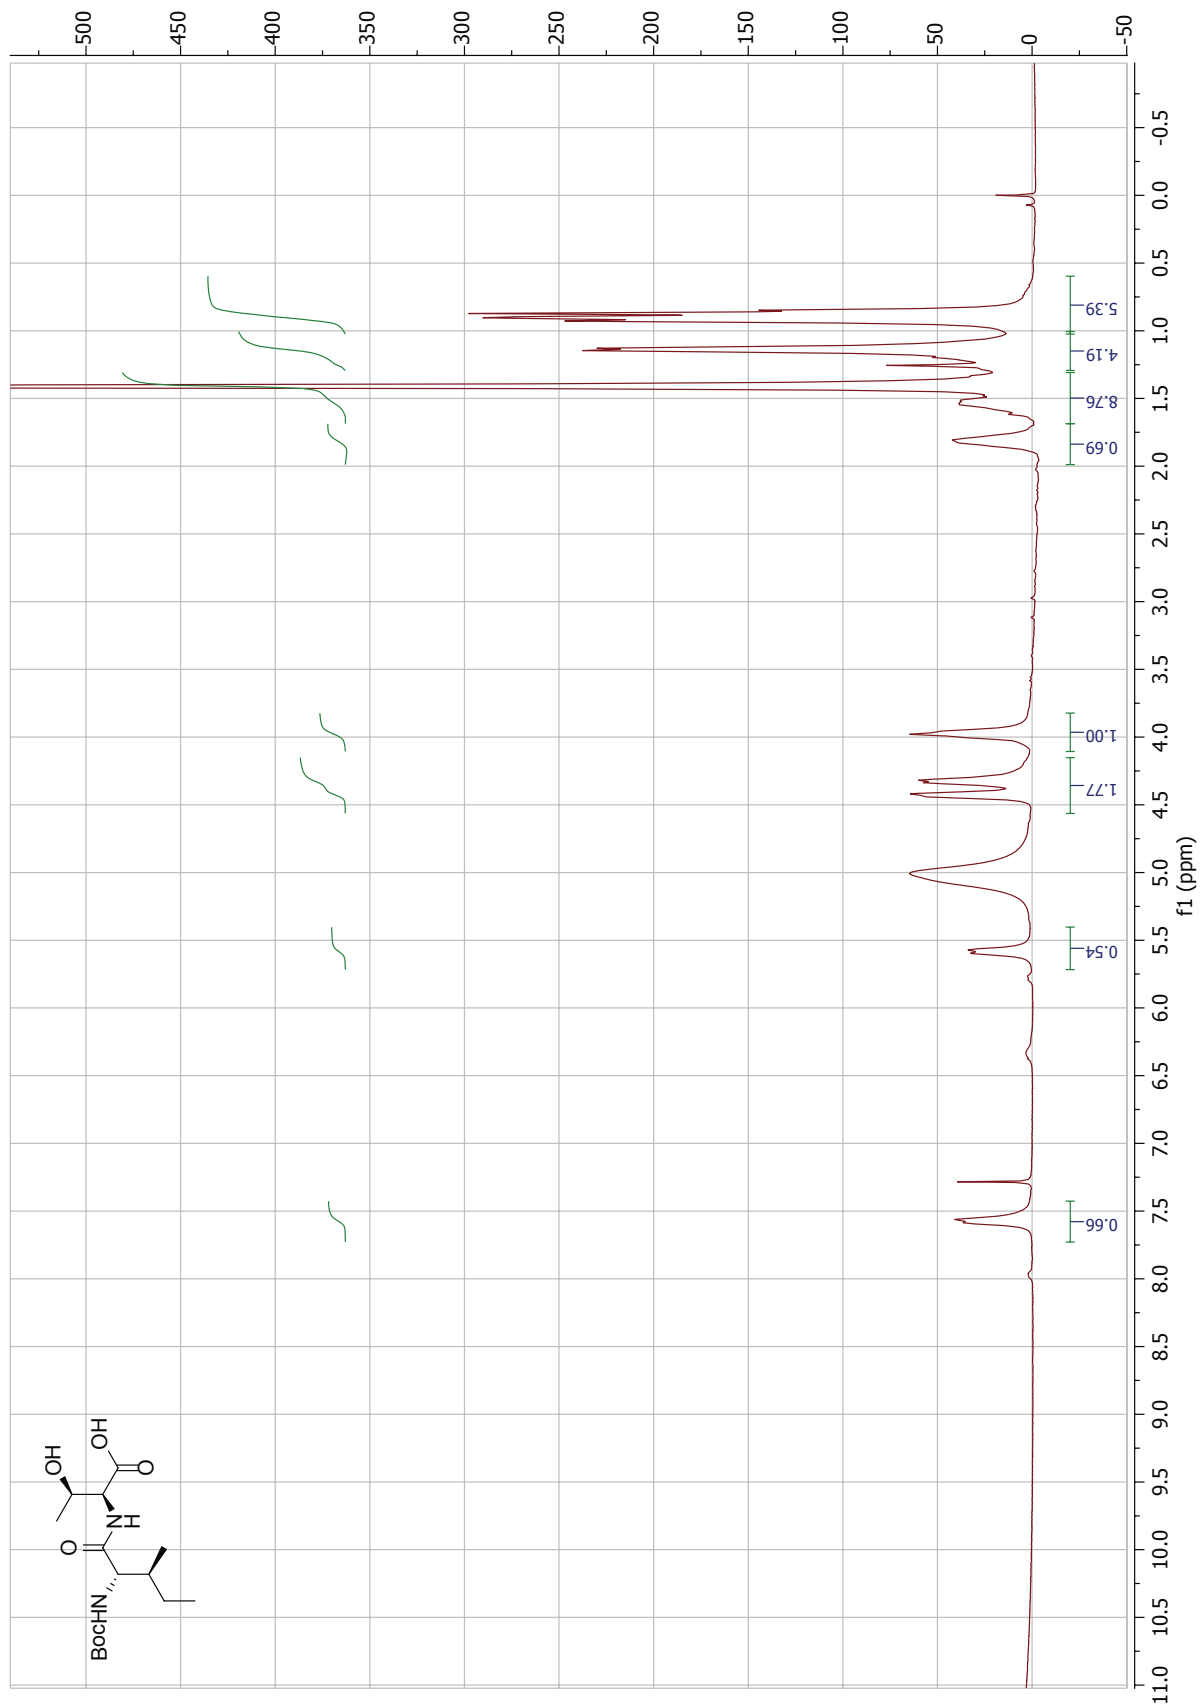

$^{13}\text{C}$  NMR spectrum of compound **9** (75.5 MHz,  $\text{CDCl}_3/\text{CD}_3\text{OD}$  99:1 v/v,  $T$  298K):

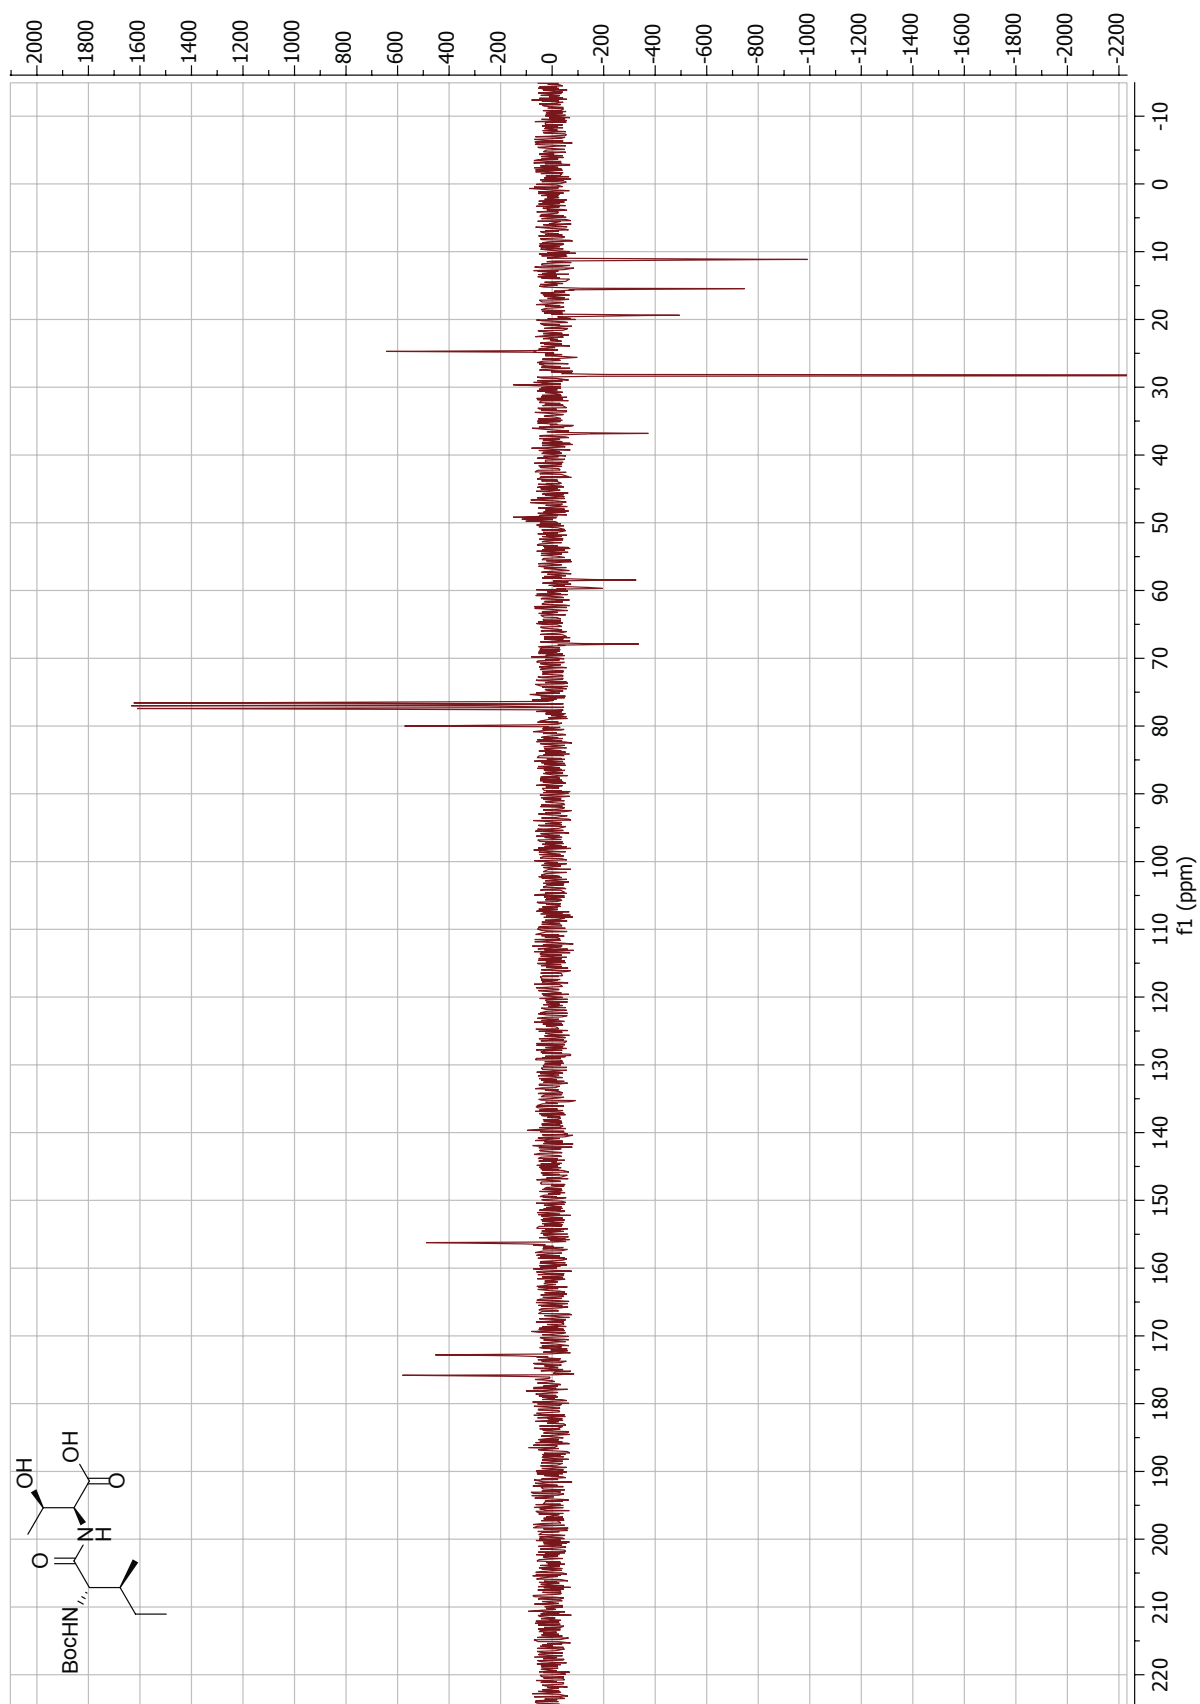

### 3. HPLC Chromatograms of Compounds 1-3, 10-12, 16-21, and 23-25.

All chromatograms were run on an automated Shimadzu HPLC system equipped with a UV/vis detector operating at 220/254 nm using an Alltech Prosphere C4 column (pore size: 300 Å, particle size: 5 μm, 250 × 4.6 mm) at a flow rate of 1 mL/min (from 100% buffer A (0.1% TFA in CH<sub>3</sub>CN/H<sub>2</sub>O 5:95 v/v) to 100% buffer B (0.1% TFA in CH<sub>3</sub>CN/H<sub>2</sub>O 95:5 v/v) in 40 min.

Compound 1:

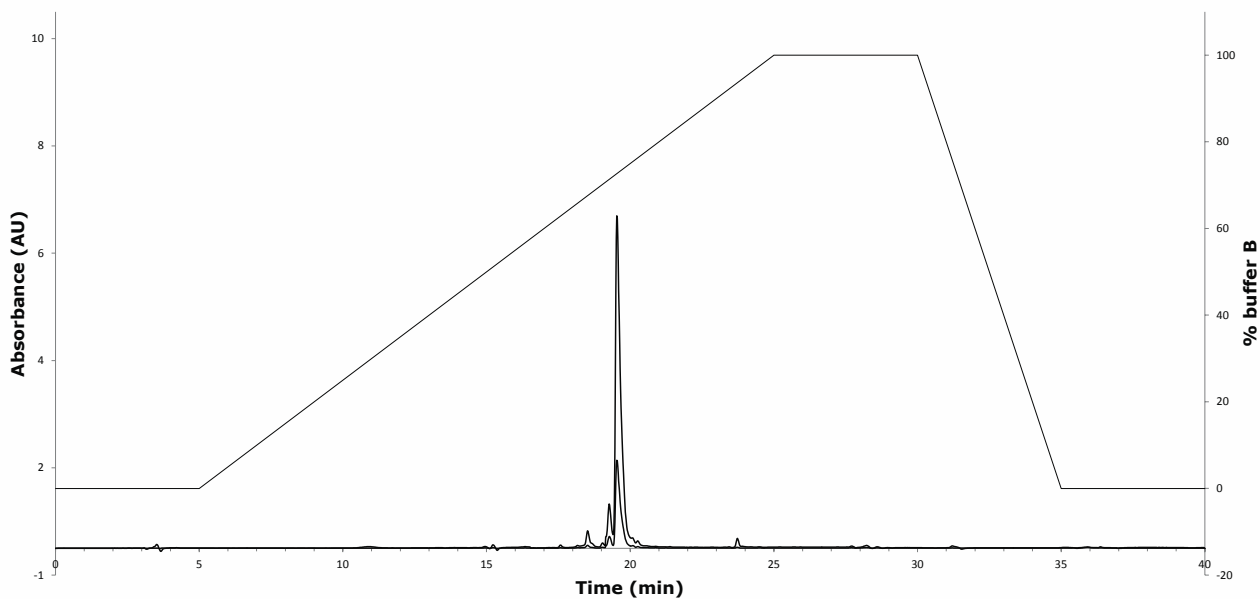

Compound 2:

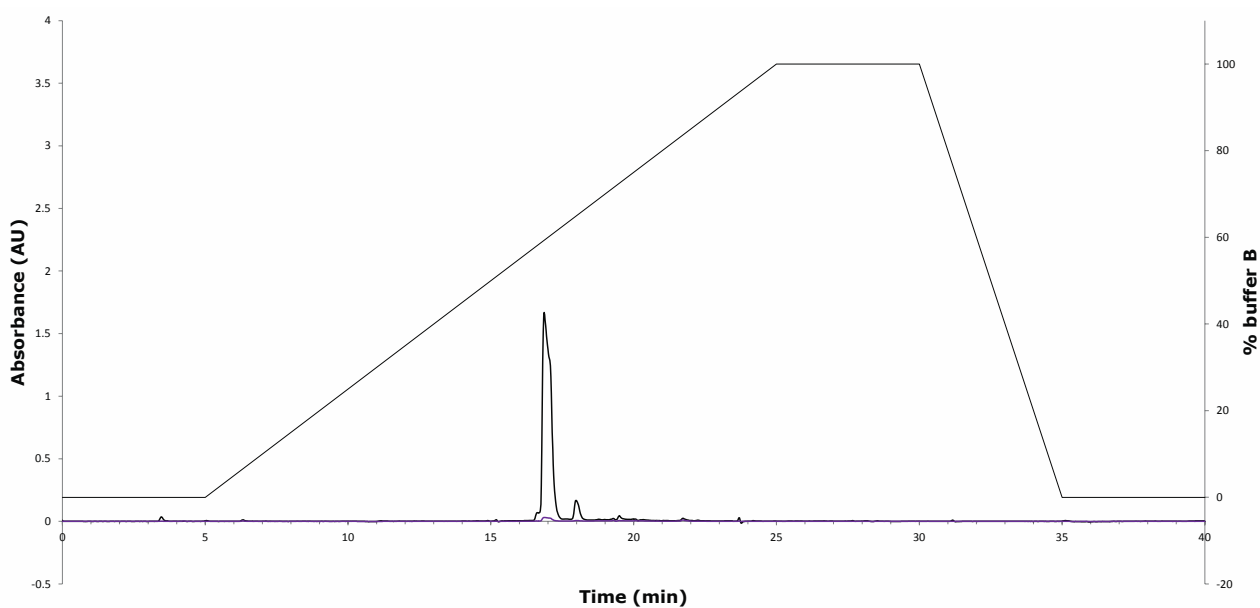



Boc-protected precursor of Compound 2:

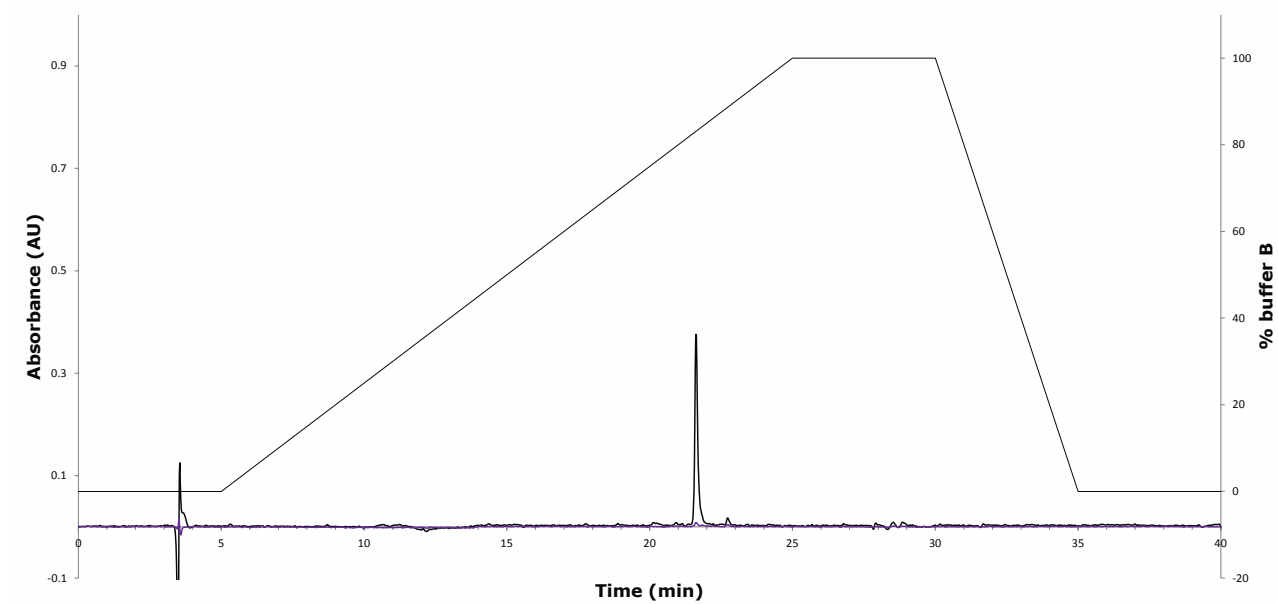

Compound 3:

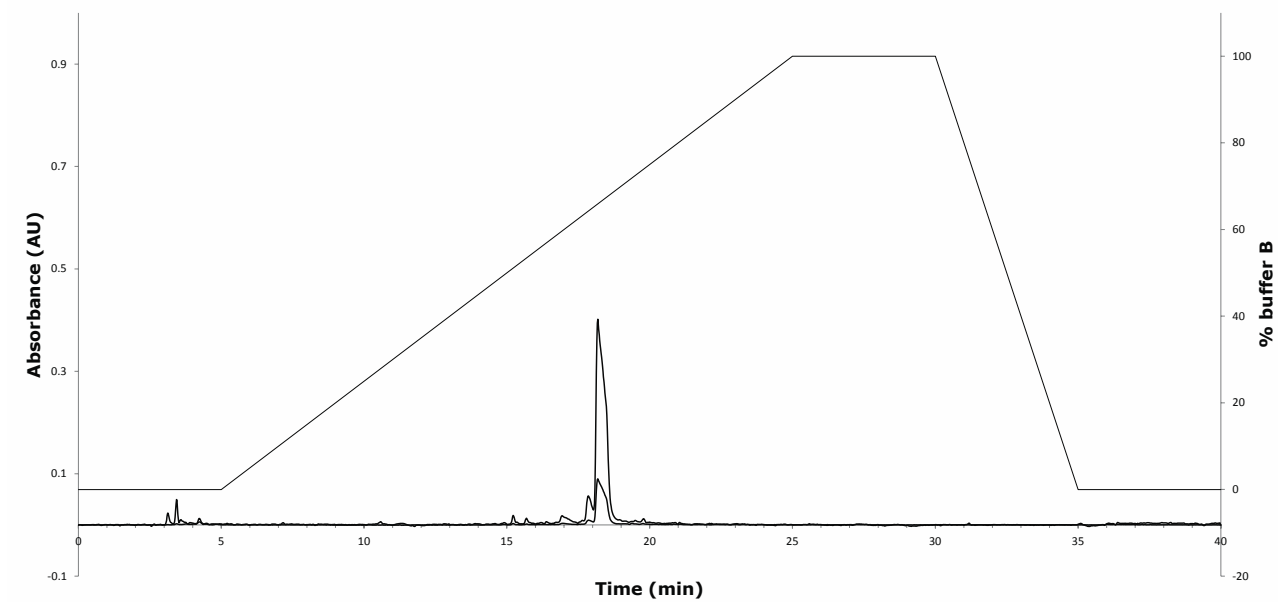

Compound 10:

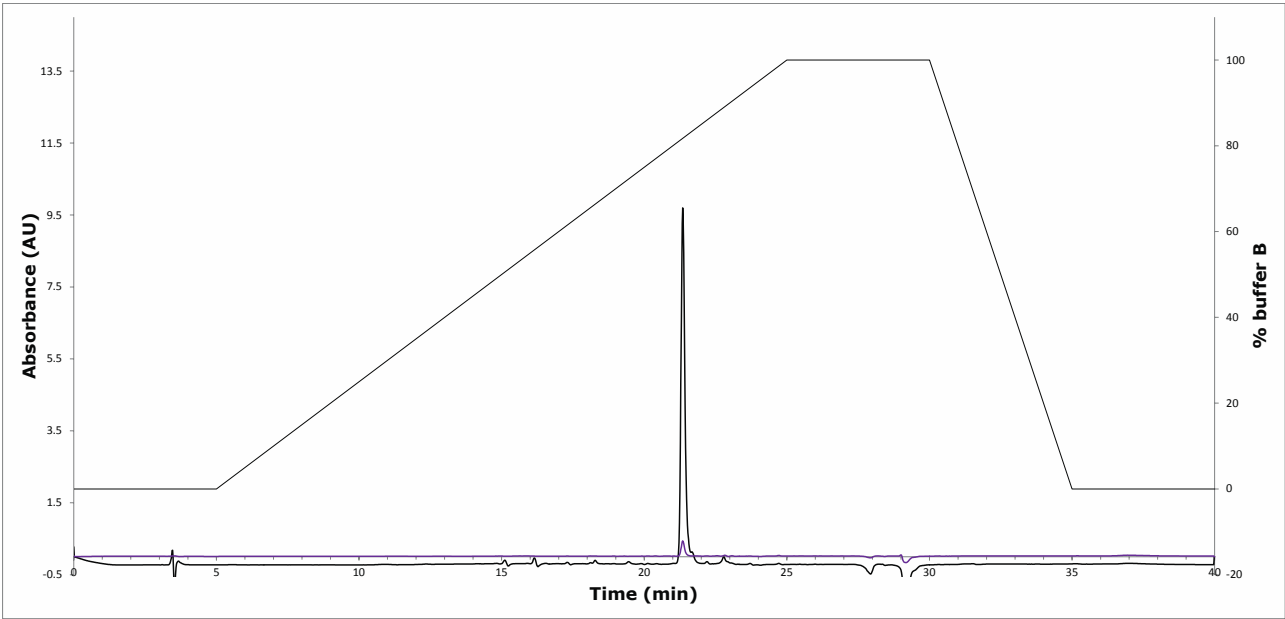

Compound 11:

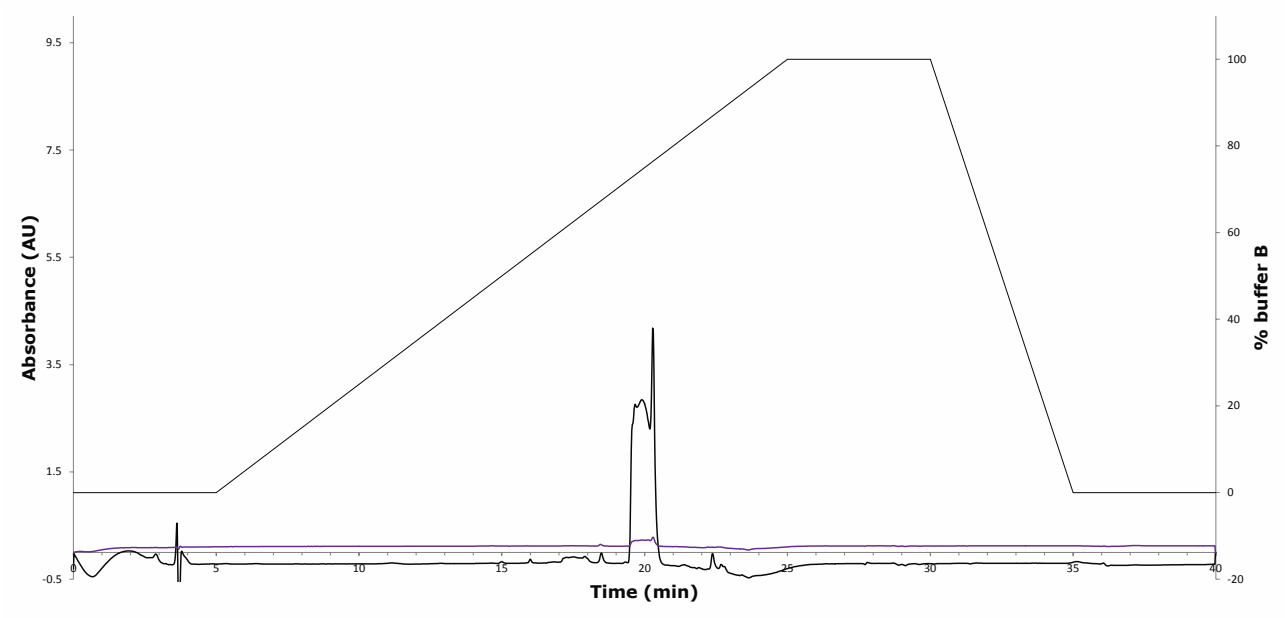

Compound 12:

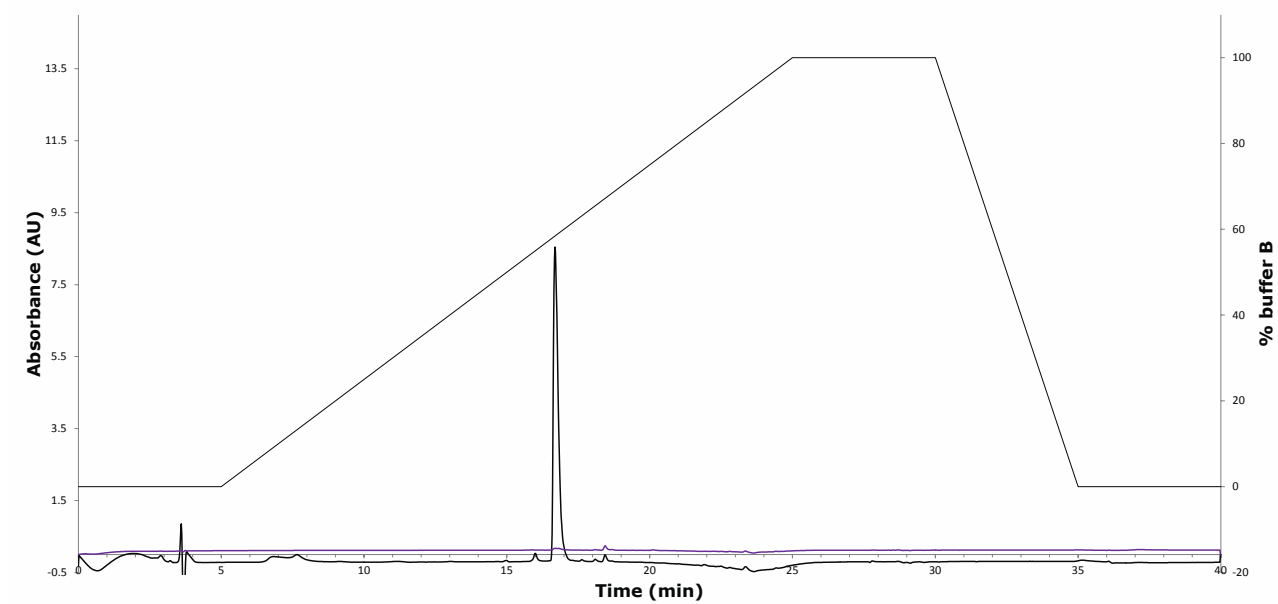

Compound 16:

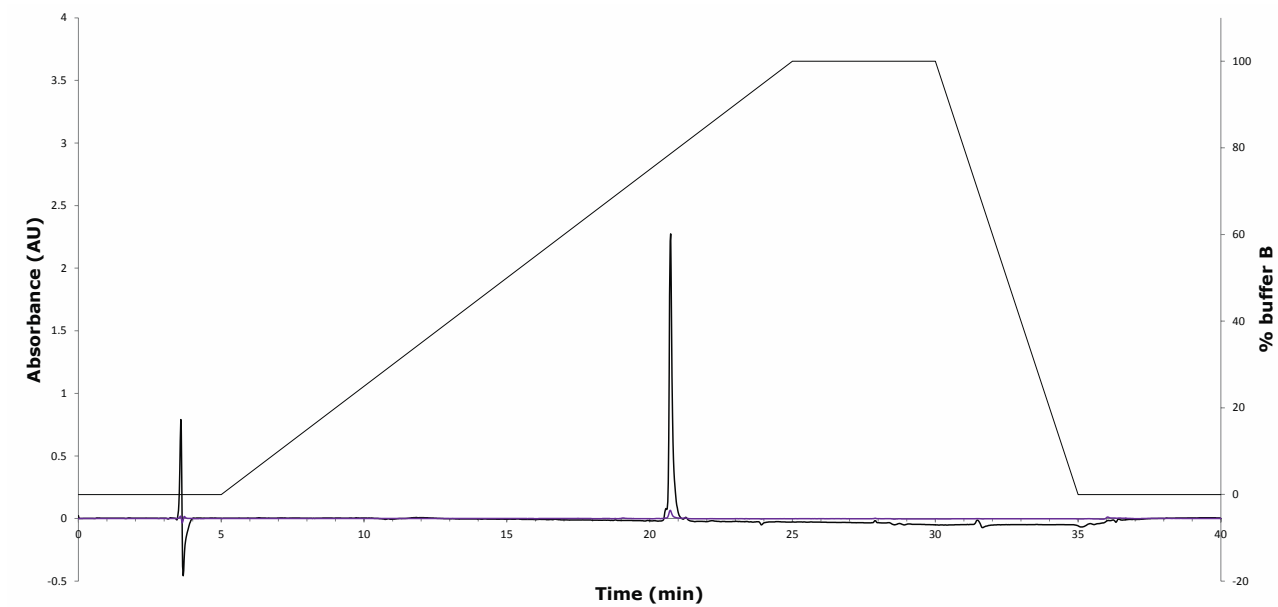

Compound 17:

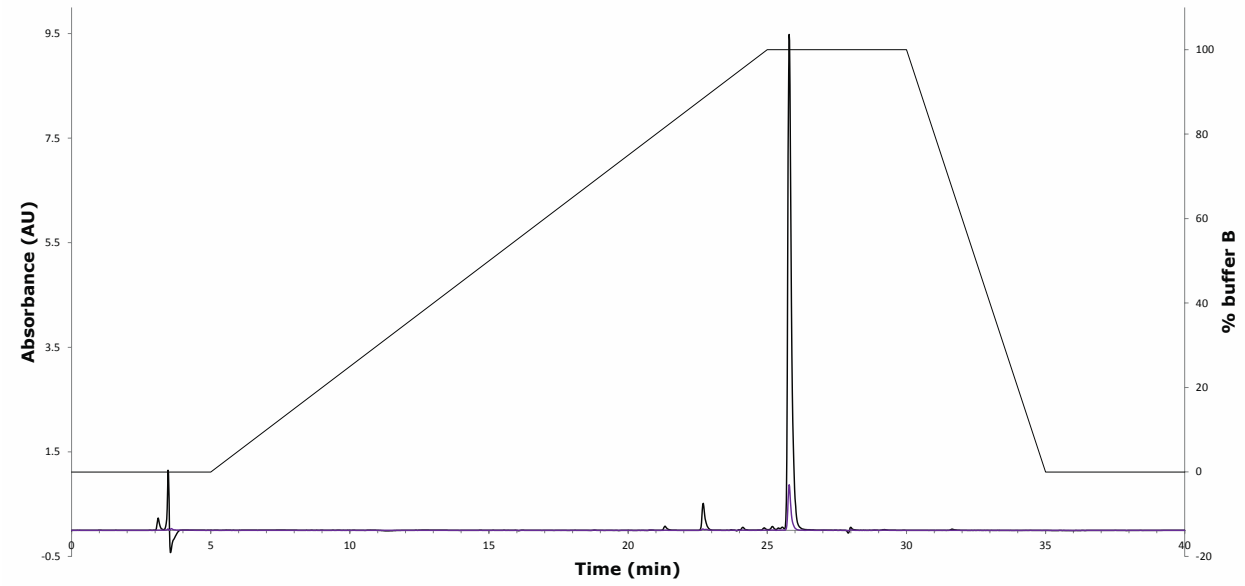

Compound 18:

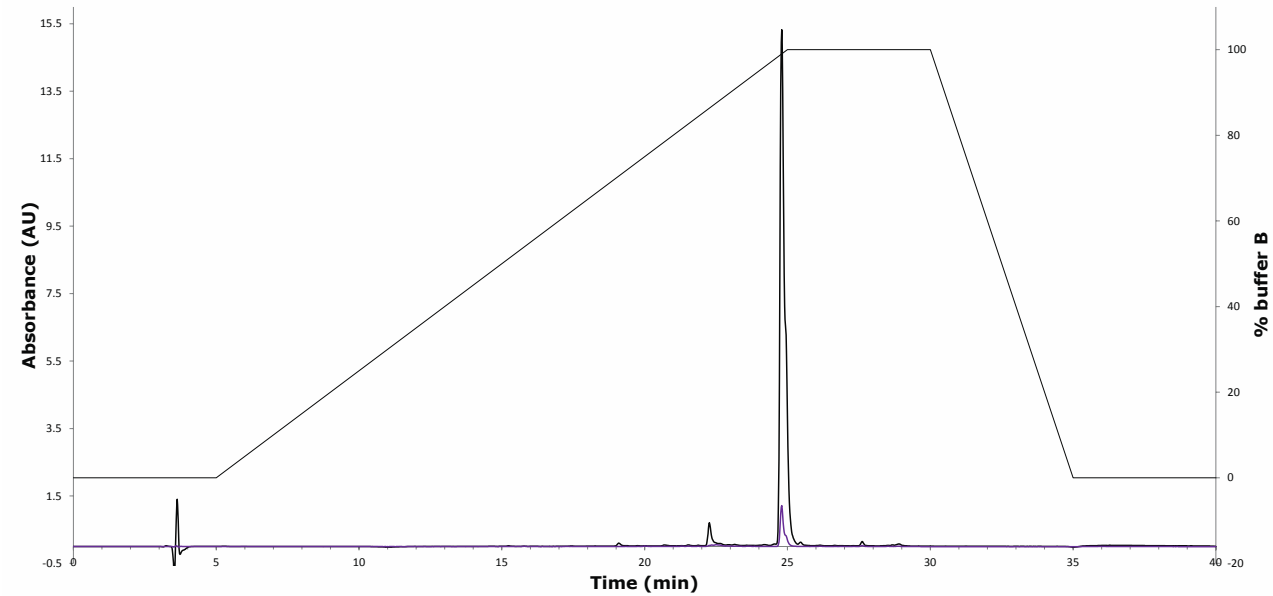

Compound 19:

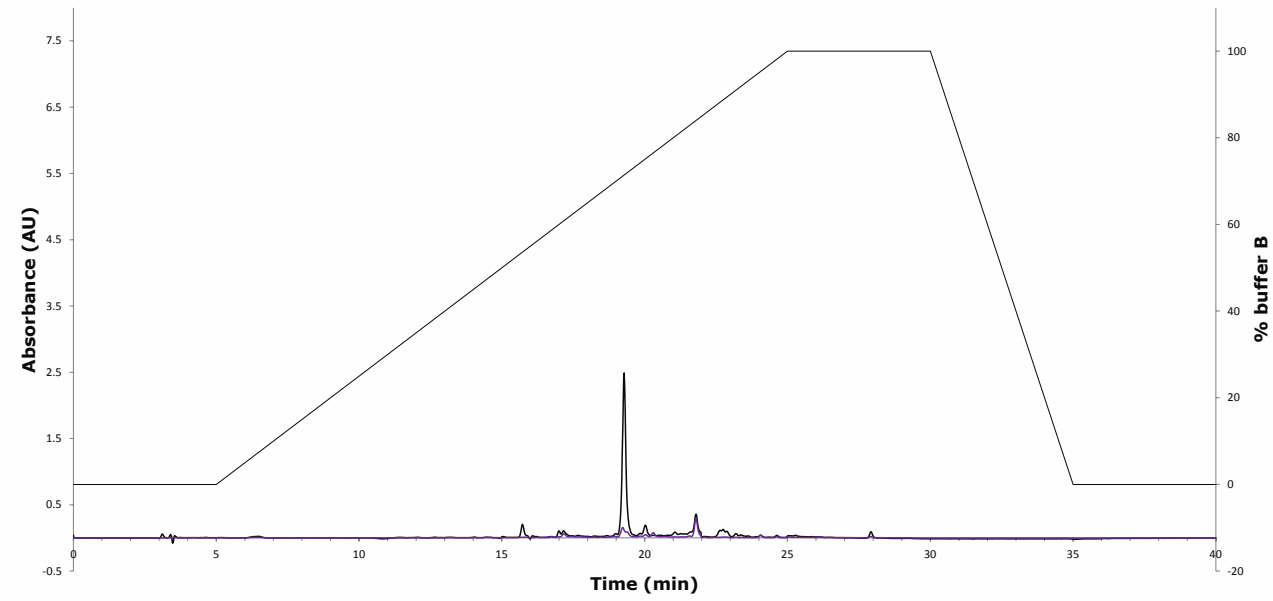

Compound 20:

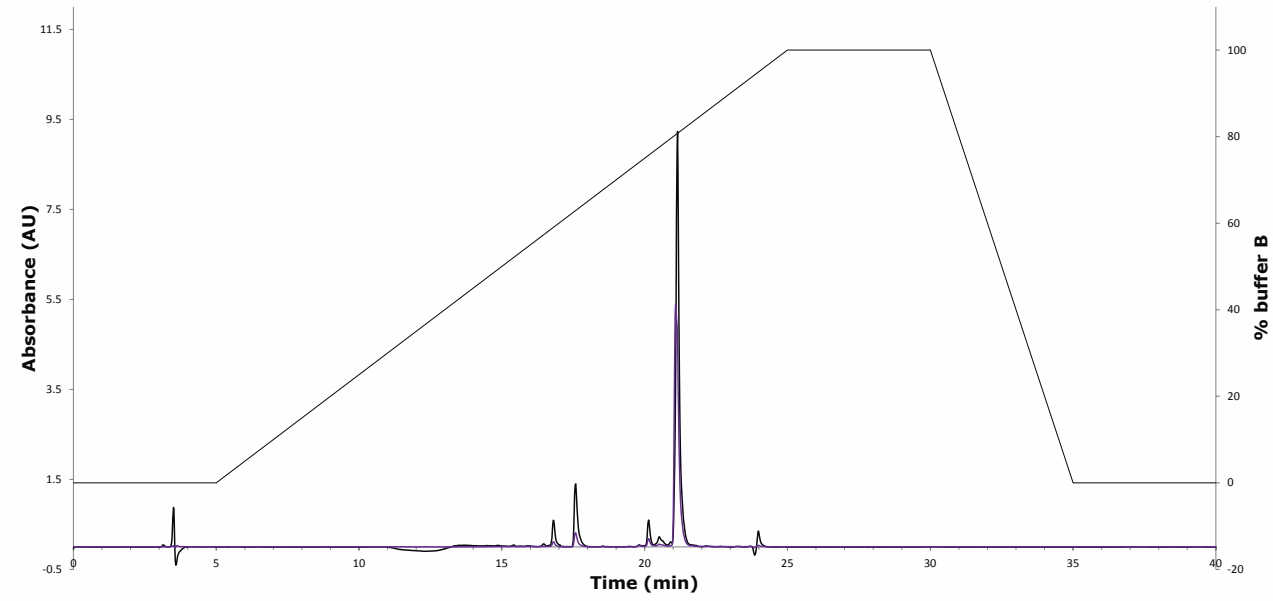

Compound 21:

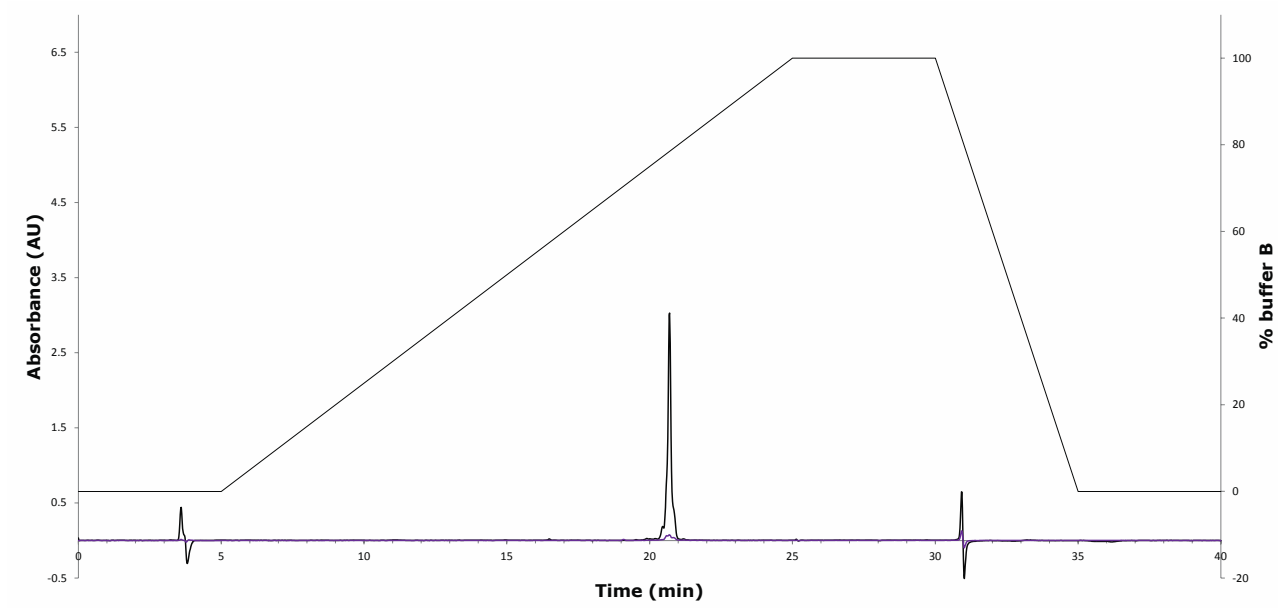

Compound 23:

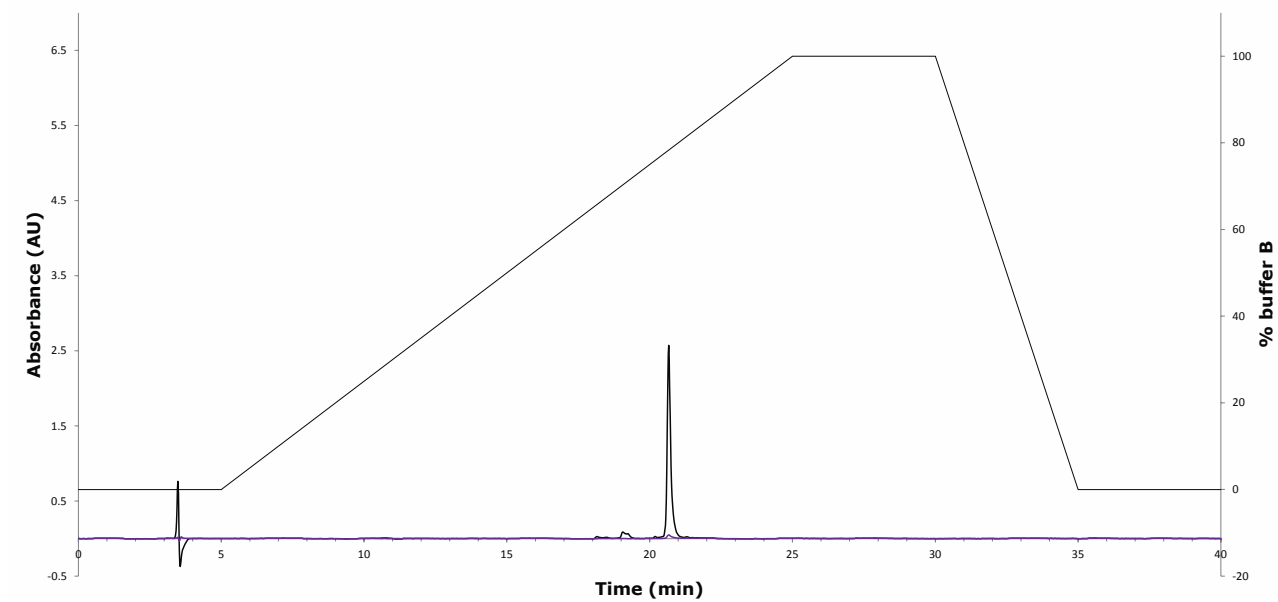

Compound 24:

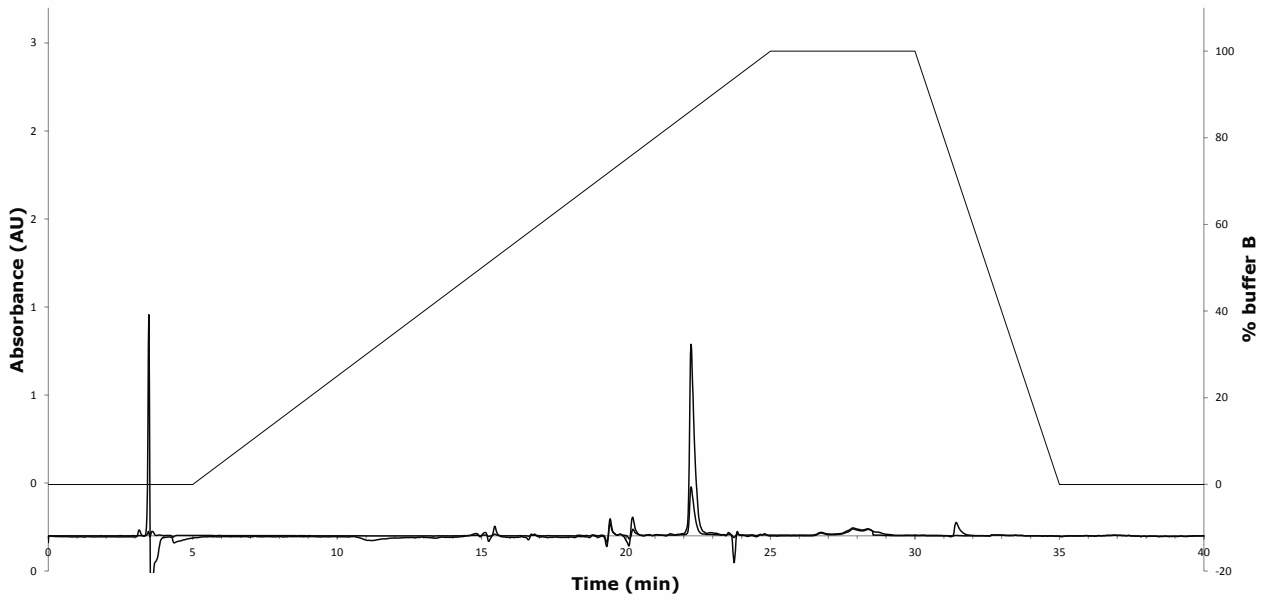

Compound 25:

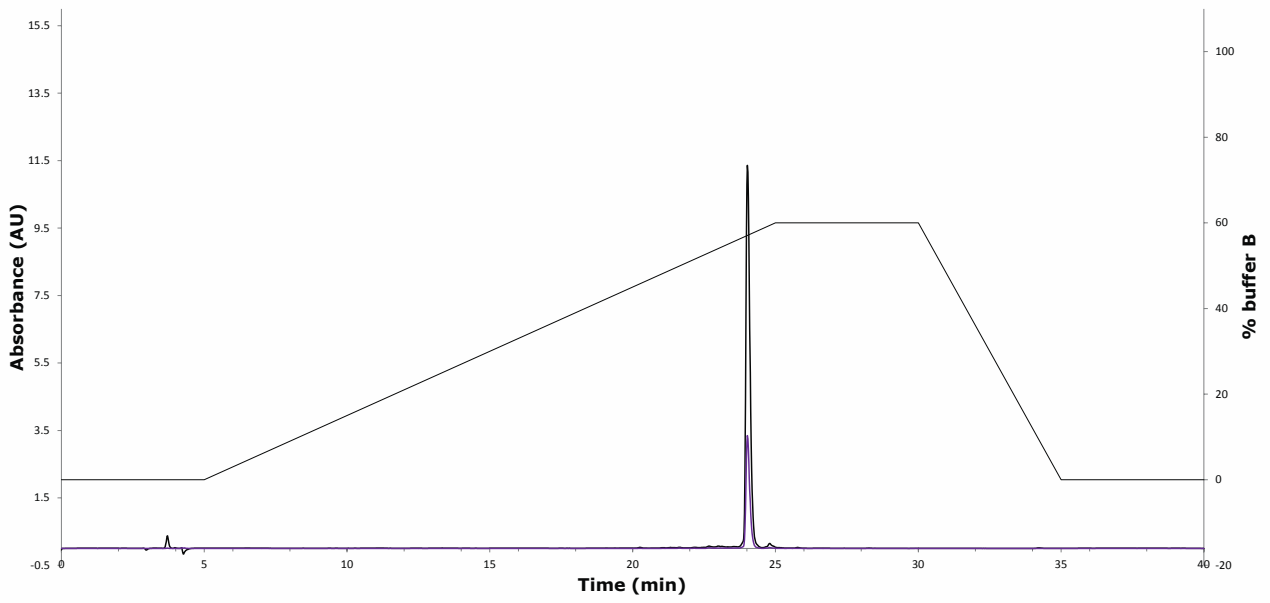

#### 4. ESI-MS Spectra of Compounds 1-6, 8-12, 16-21, and 23-25.

Compound 1:

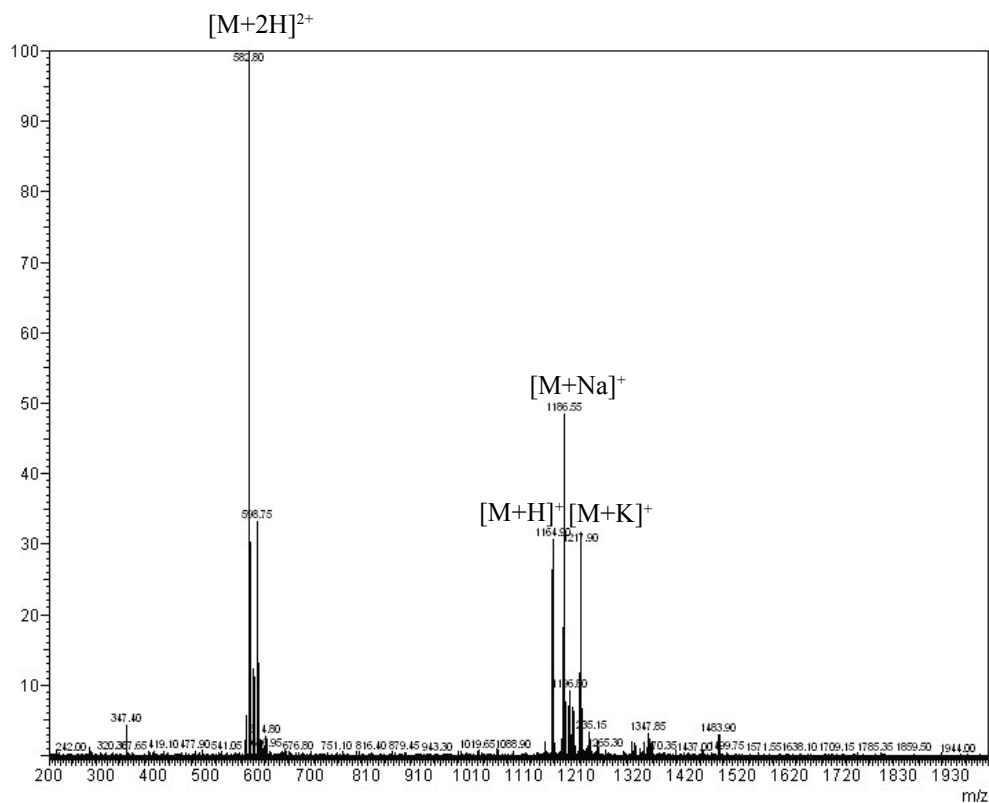

Compound 2:

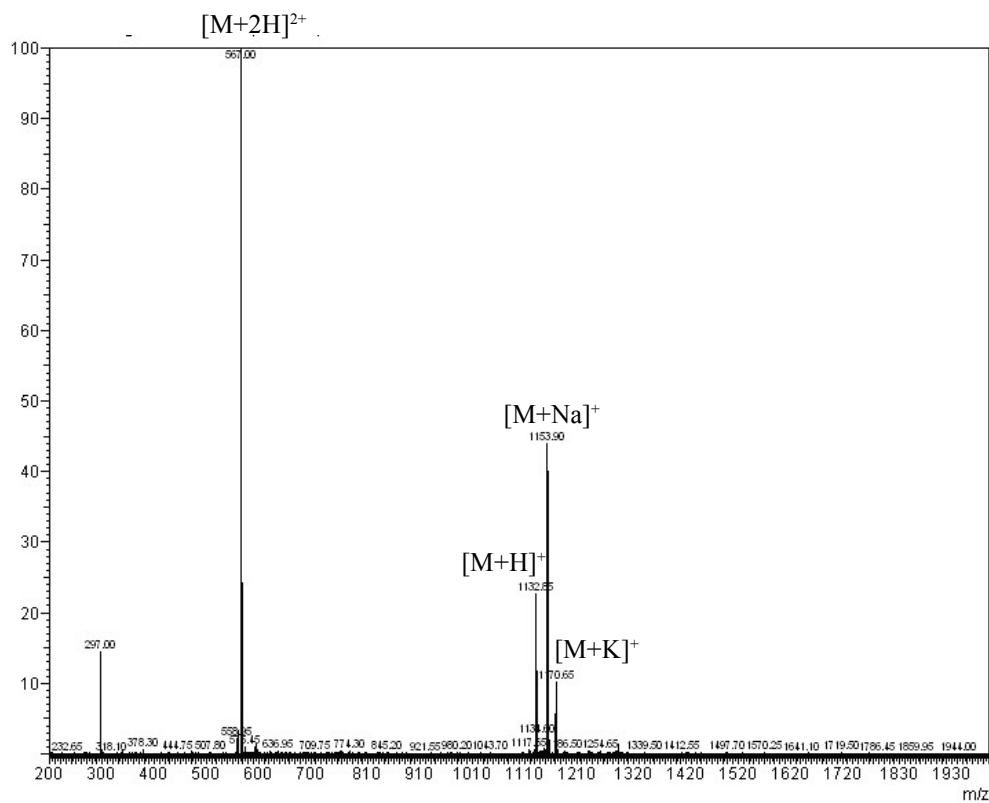



Boc-protected precursor of Compound 2:

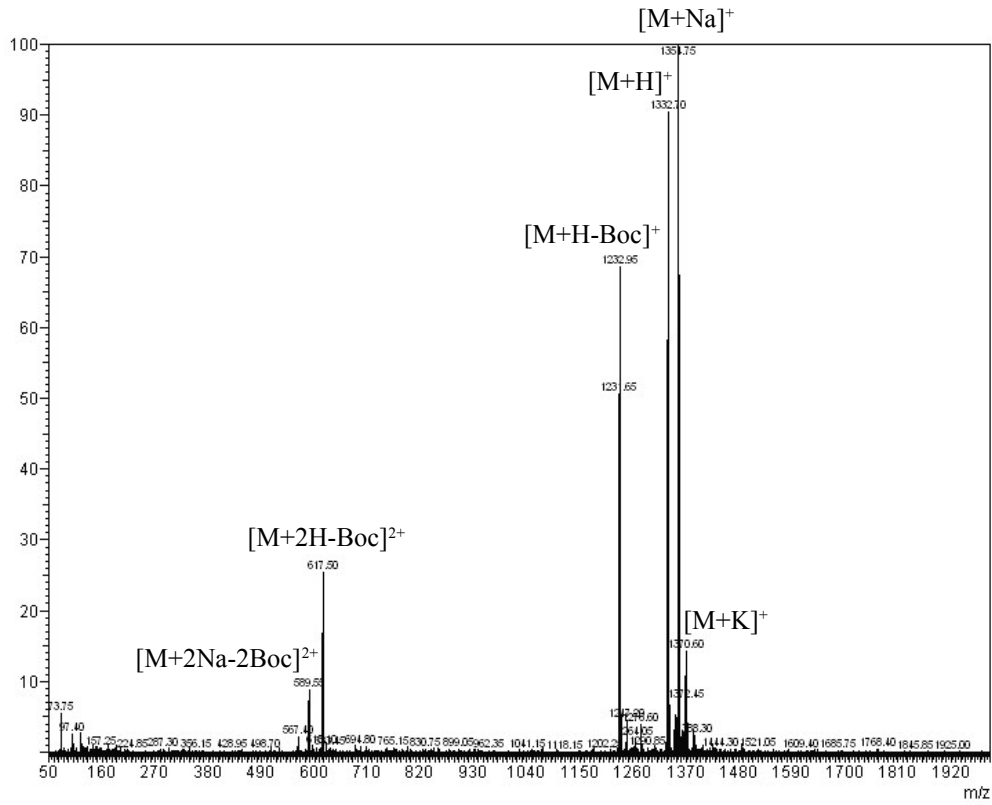

Compound 3:

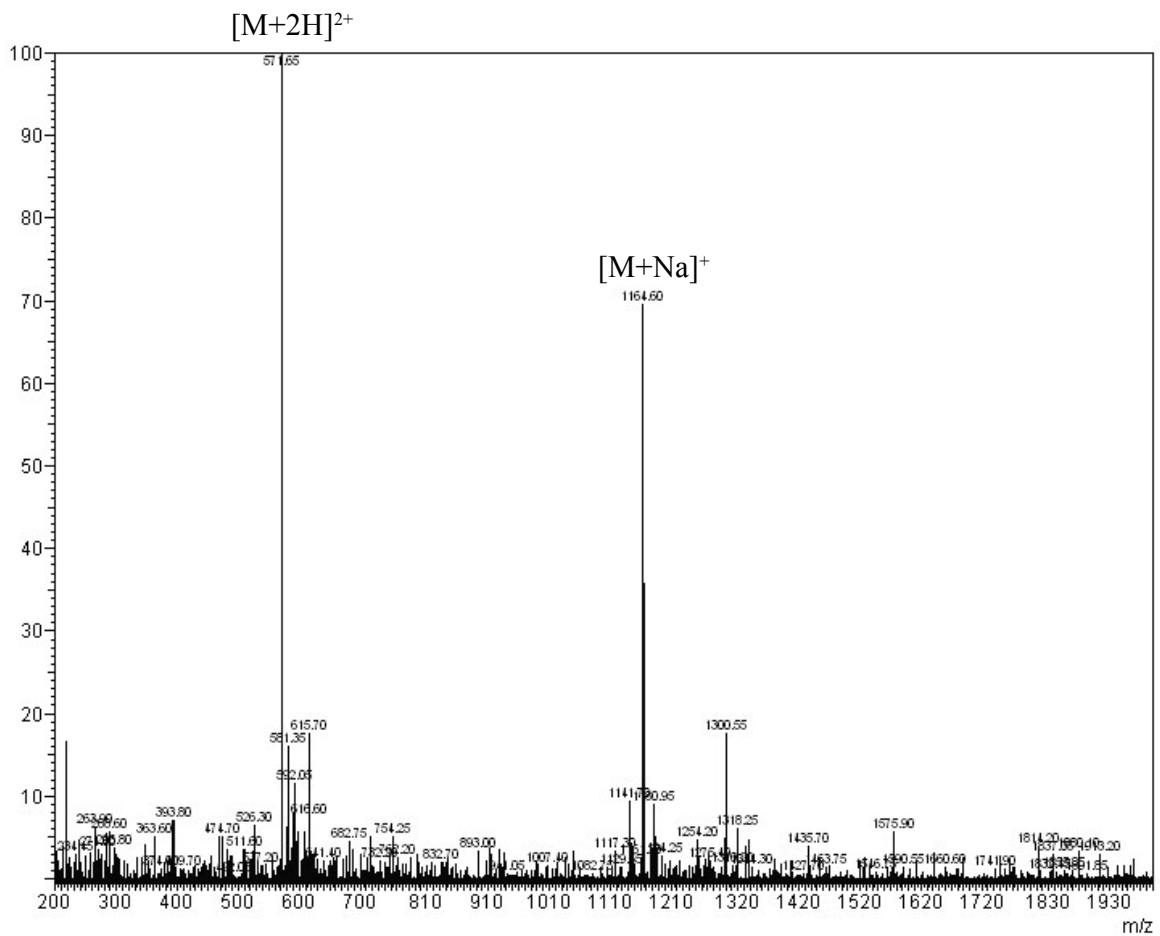

Compound 4: ESI-MS calcd for  $C_{15}H_{28}N_2O_5$  316.20, found  $m/z$   $[M+H]^+$  317.30,  $[M+Na]^+$  339.45,  $[(M-Bu)+H]^+$  260.90,  $[(M-Boc)+H]^+$  217.00.

Sample Information Item  
Date and Time : 4/1/2015 15:17:41 PM  
User : Aliaksei  
Type : Unknown  
Inj. Volume : 20.000  
Data Name : E:\Users\Dirk\New Folder\BocIle\AlaOMe.qld  
Method Name : E:\Mass files\Method\Positive mode\200-2000 0.3ml-min flow.qlm  
Tuning Name : E:\Mass files\Tuning\Autotune 20120620.QLT

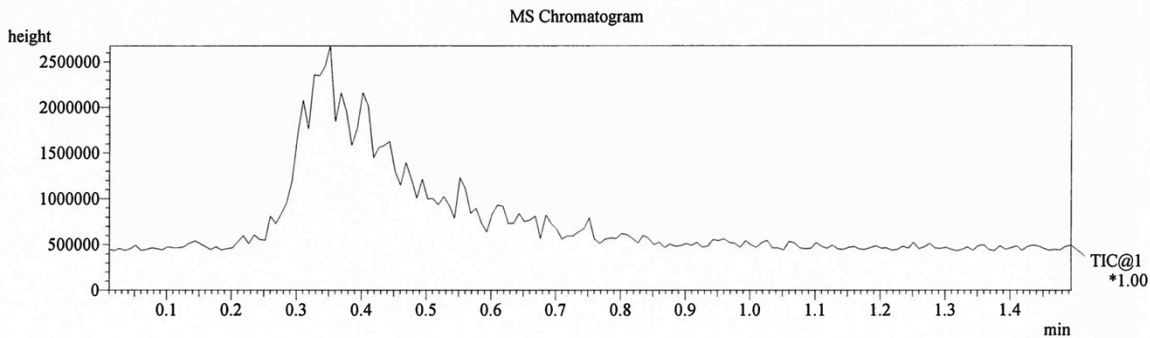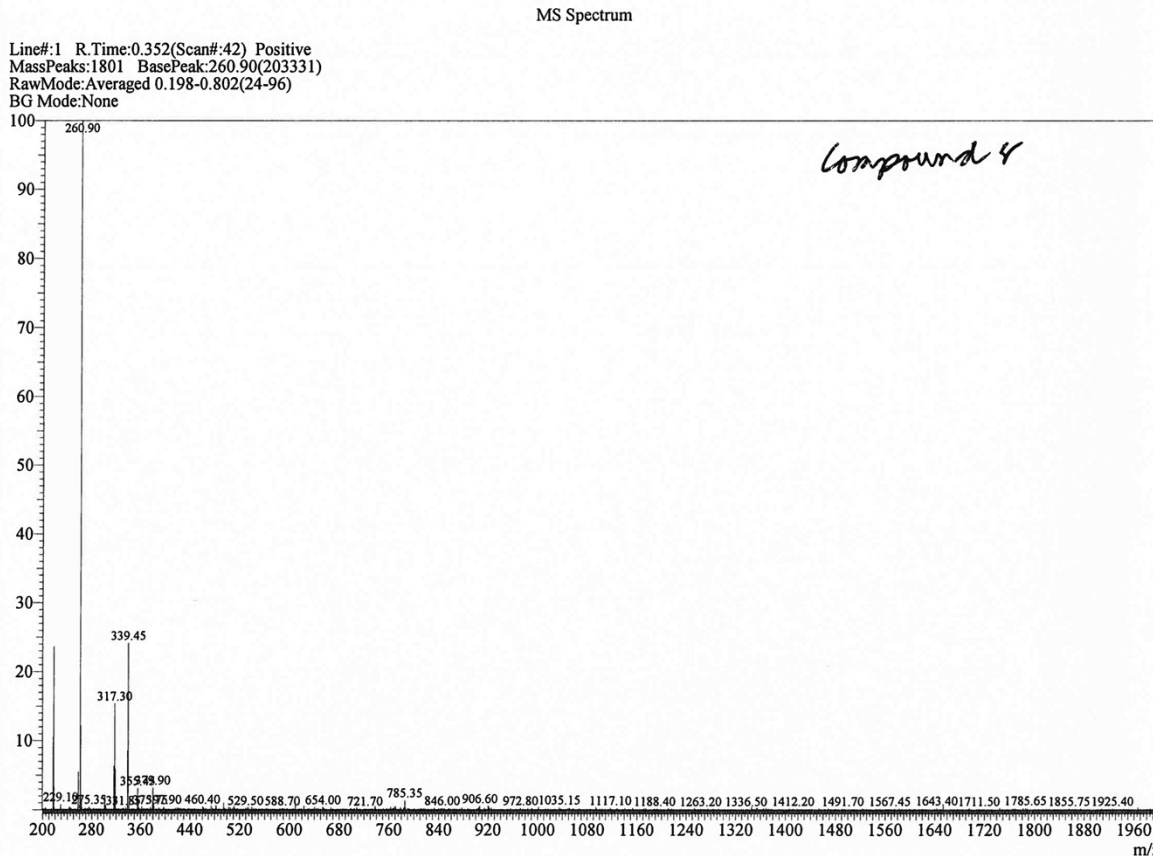

Compound 5: ESI-MS calcd for  $C_{14}H_{26}N_2O_5$  302.18, found  $m/z$   $[M+Na]^+$  325.50,  $[2M+Na]^+$  626.85,  $[(M-Bu)+H]^+$  260.90,  $[(M-Boc)+H]^+$  203.00.

Sample Information Item  
Date and Time : 4/1/2015 15:20:47 PM  
User : Aliaksei  
Type : Unknown  
Inj. Volume : 20.000  
Data Name : E:\Users\Dirk\New Folder\BocIleAlaOH.qld  
Method Name : E:\Mass files\Method\Positive mode\200-2000 0.3ml-min flow.qlm  
Tuning Name : E:\Mass files\Tuning\Autotune 20120620.QLT

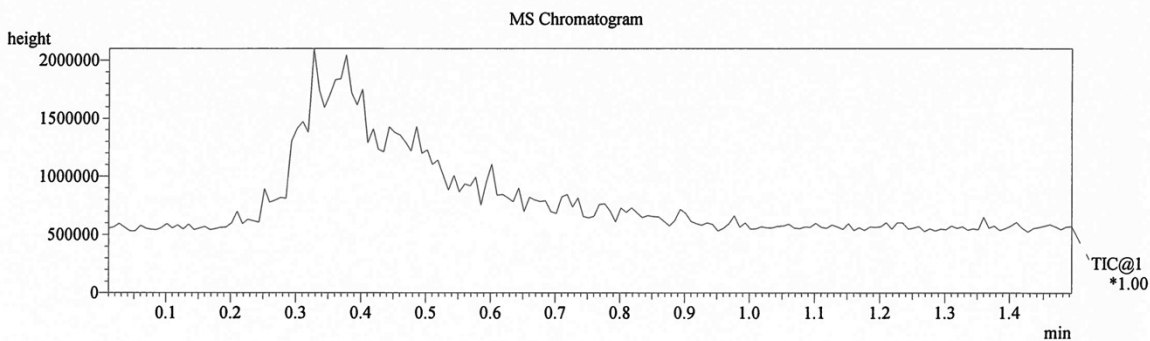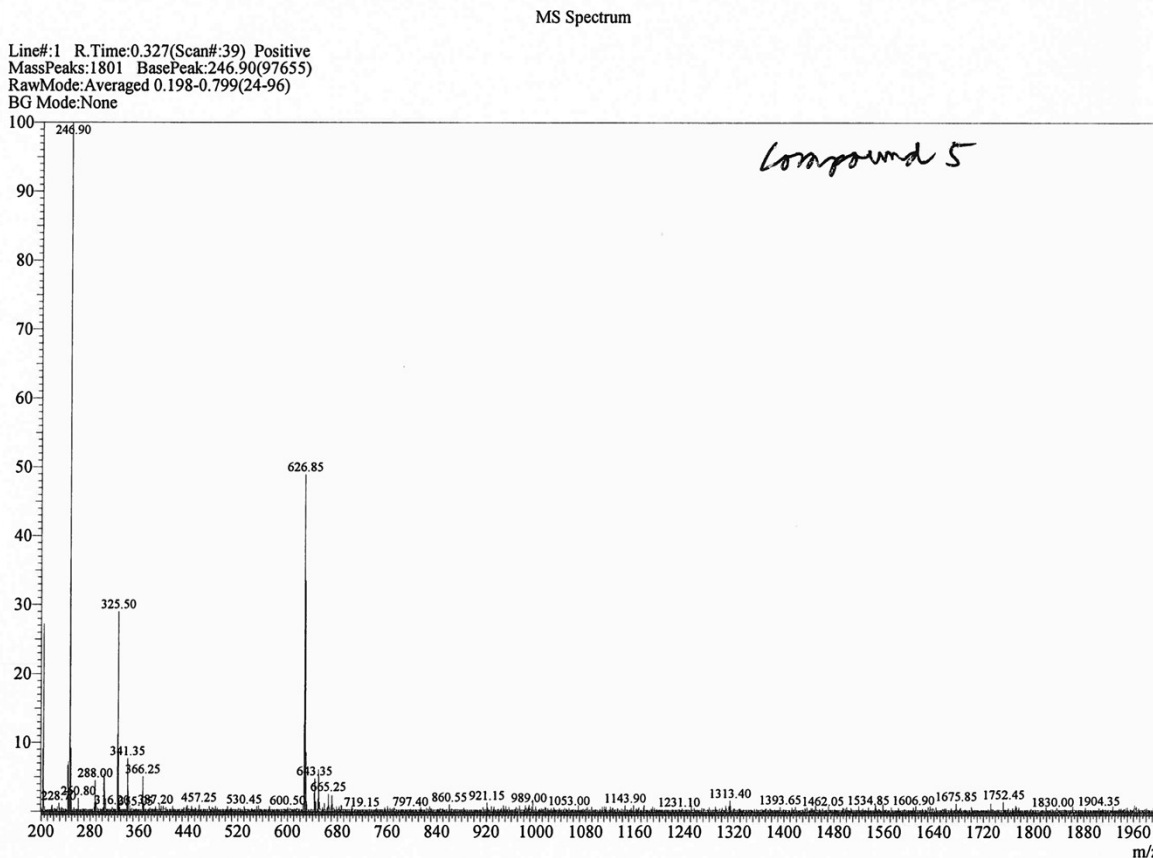

Compound 6: ESI-MS calcd for  $C_{16}H_{30}N_2O_6$  346.21, found  $m/z$   $[M+H]^+$  346.80,  $[M+Na]^+$  368.70,  $[(M-Bu)+H]^+$  291.10,  $[(M-Boc)+H]^+$  247.25.

Sample Information Item  
Date and Time : 4/1/2015 15:23:54 PM  
User : Aliaksei  
Type : Unknown  
Inj. Volume : 20.000  
Data Name : E:\Users\Dirk\New Folder\BocIleThrOMe.qld  
Method Name : E:\Mass files\Method\Positive mode\200-2000 0.3ml-min flow.qlm  
Tuning Name : E:\Mass files\Tuning\Autotune 20120620.QLT

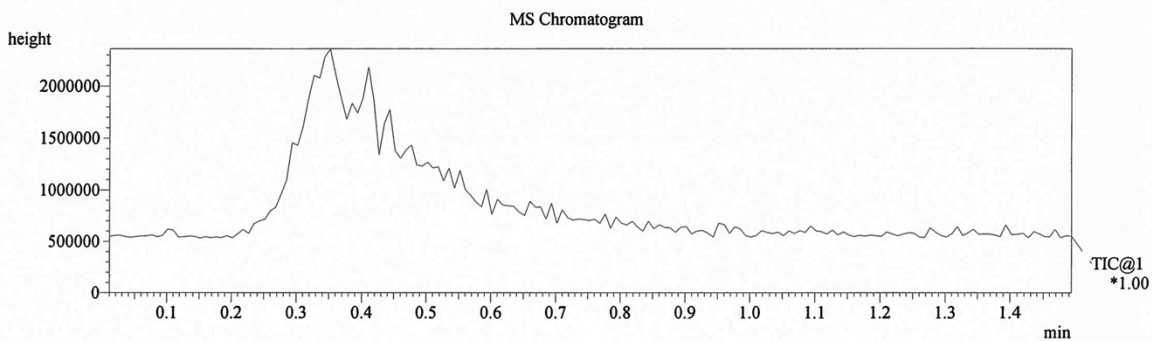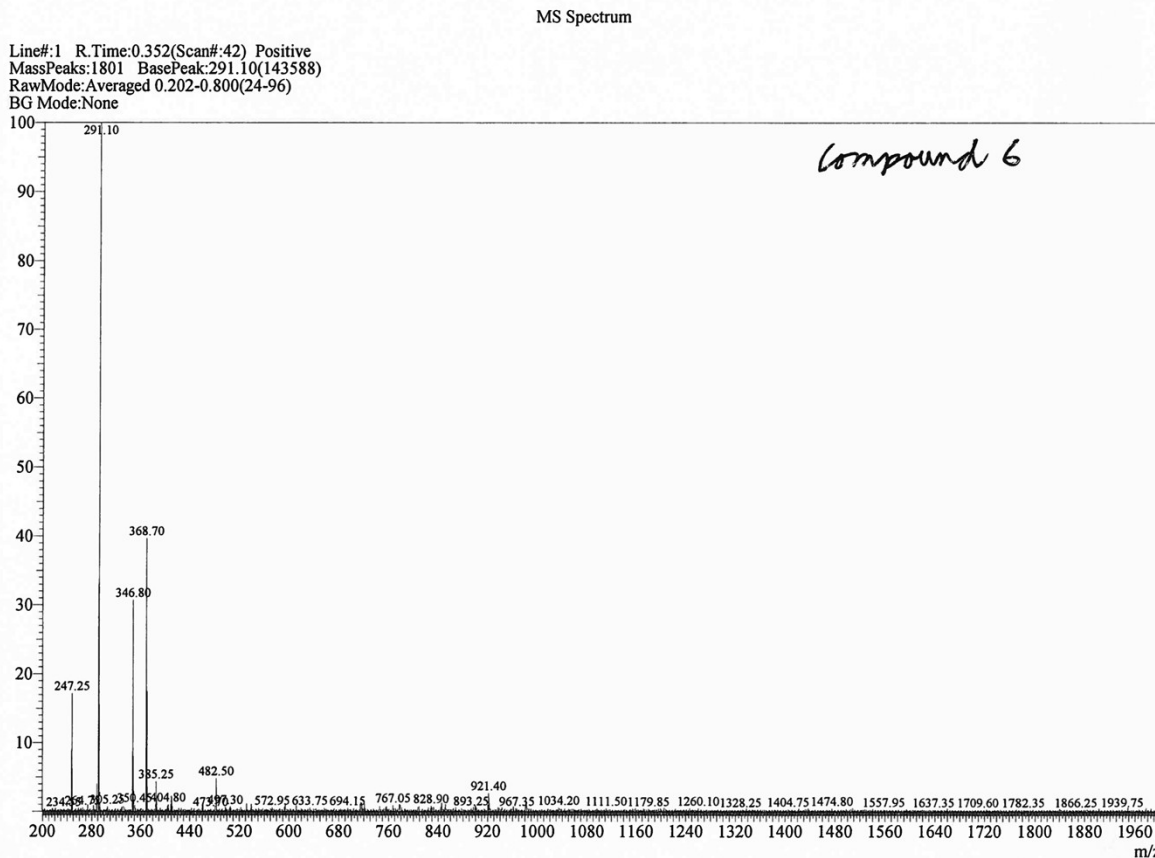

Compound 8: ESI-MS calcd for  $C_{15}H_{26}N_2O_5$  314.18, found  $m/z$   $[M+Na]^+$  337.55,  $[M+K]^+$  352.85,  $[2M+Na]^+$  651.00,  $[(M-Bu)+H]^+$  258.70,  $[(M-Boc)+H]^+$  215.15.

Sample Information Item  
Date and Time : 4/1/2015 16:10:18 PM  
User : Aliaksei  
Type : Unknown  
Inj. Volume : 20.000  
Data Name : E:\Users\Dirk\New Folder\BocIleDhbOH\_002.qld  
Method Name : E:\Mass files\Method\Positive mode\50-2000 0.3ml-min flow.qlm  
Tuning Name : E:\Mass files\Tuning\Autotune 20120620.QLT

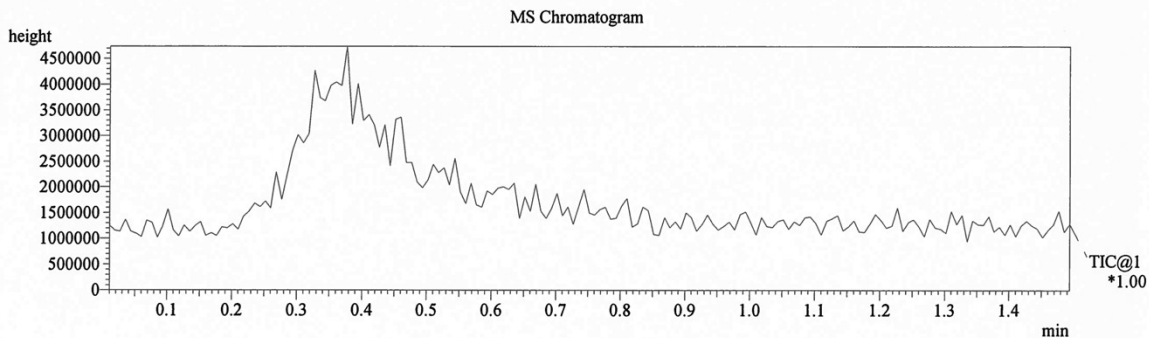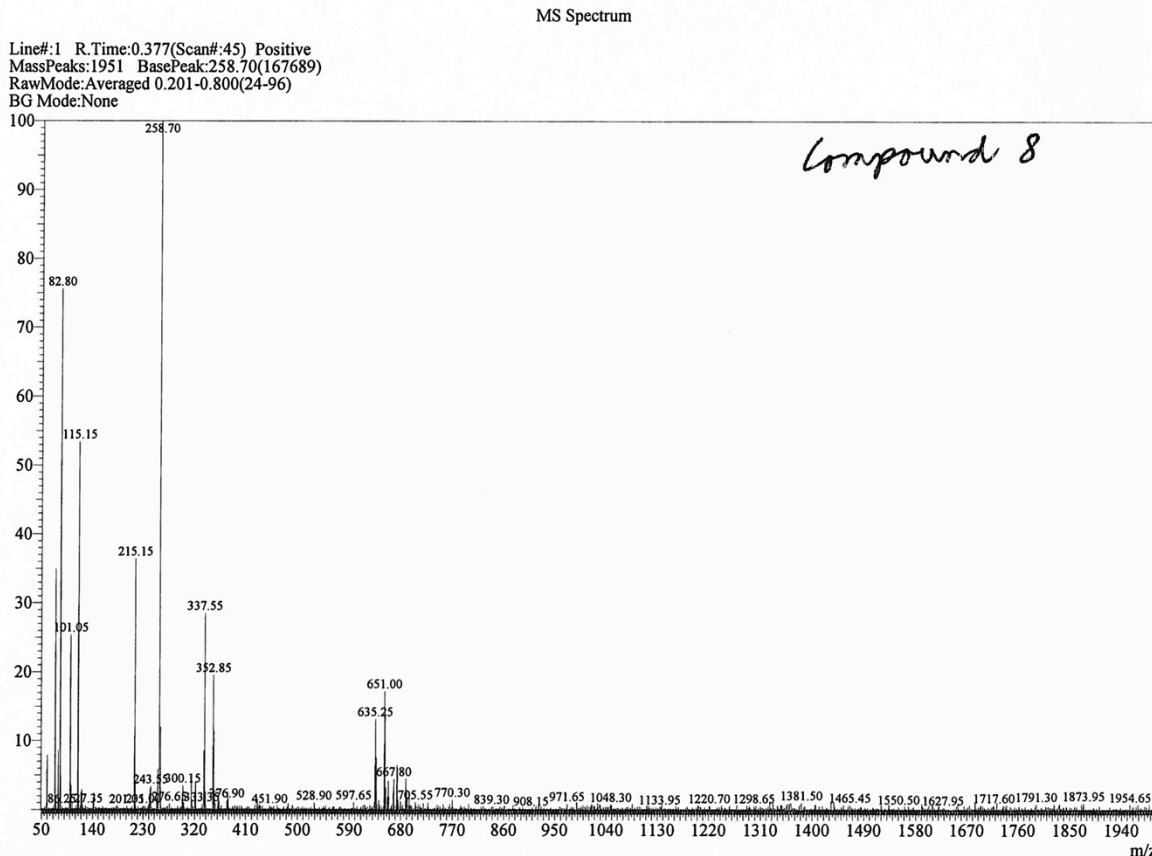

Compound 9: ESI-MS calcd for C<sub>15</sub>H<sub>28</sub>N<sub>2</sub>O<sub>6</sub> 332.19, found  $m/z$   $[M+H]^+$  333.10,  $[M+Na]^+$  355.15,  $[2M+Na]^+$  687.50,  $[(M-Bu)+H]^+$  276.80,  $[(M-Boc)+H]^+$  232.95.

Sample Information Item  
Date and Time : 4/1/2015 15:33:13 PM  
User : Aliaksei  
Type : Unknown  
Inj. Volume : 20.000  
Data Name : E:\Users\Dirk\New Folder\BocIleThrOH.qld  
Method Name : E:\Mass files\Method\Positive mode\200-2000 0.3ml-min flow.qlm  
Tuning Name : E:\Mass files\Tuning\Autotune 20120620.QLT

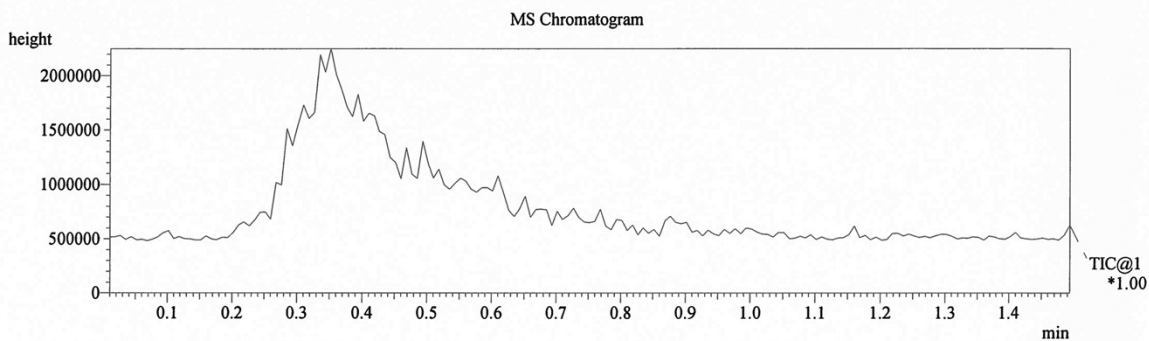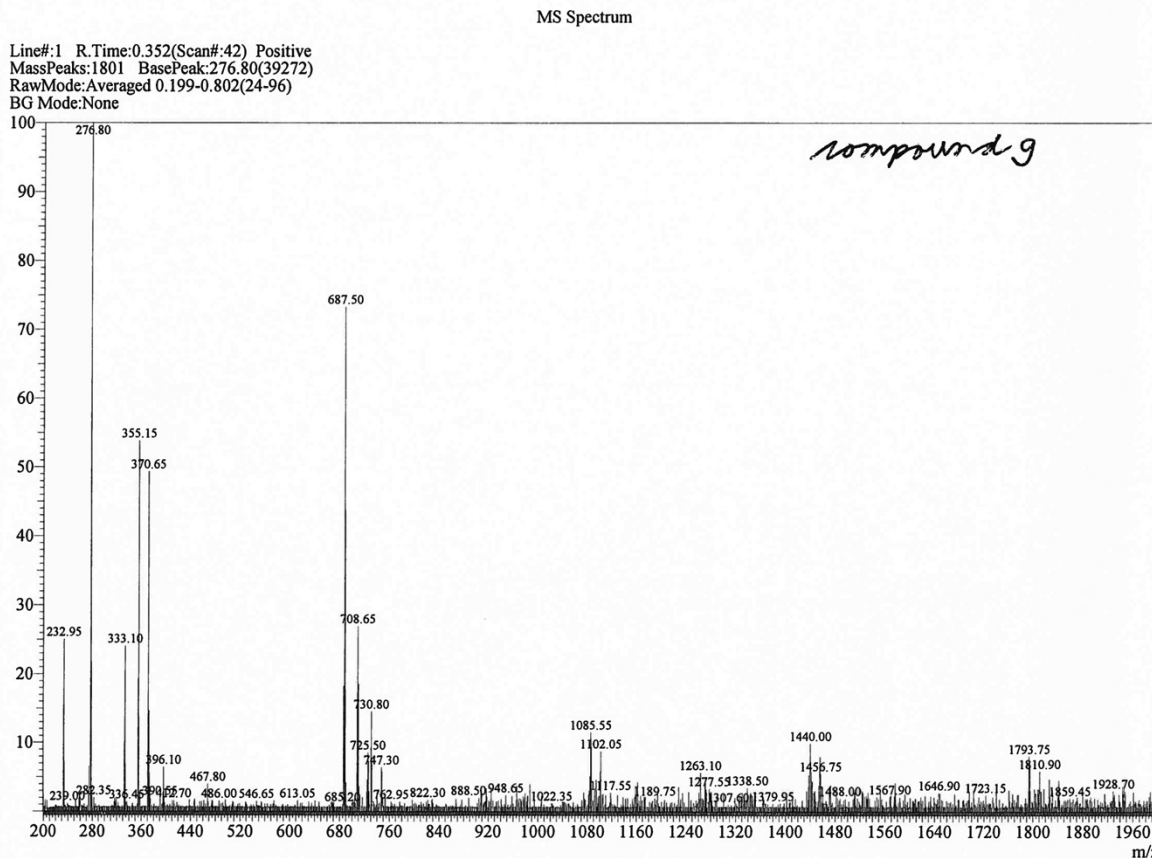

Compound 10:

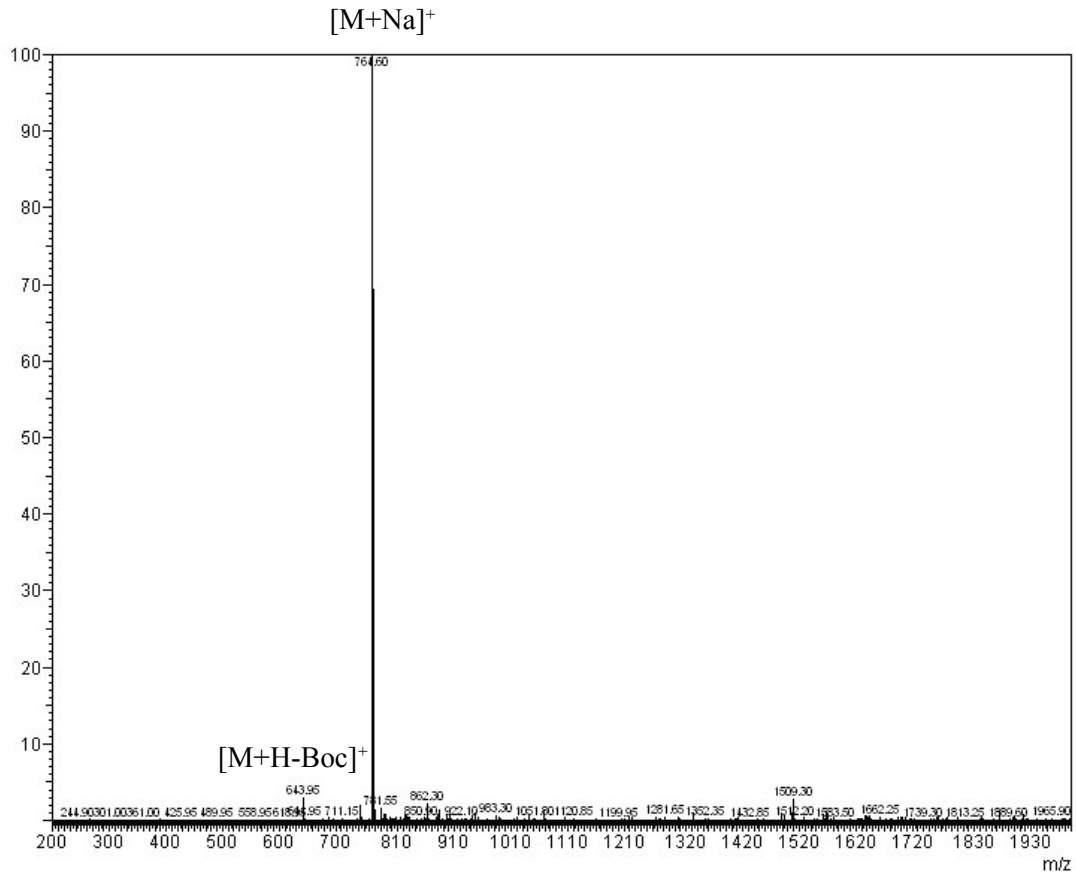

Compound 11:

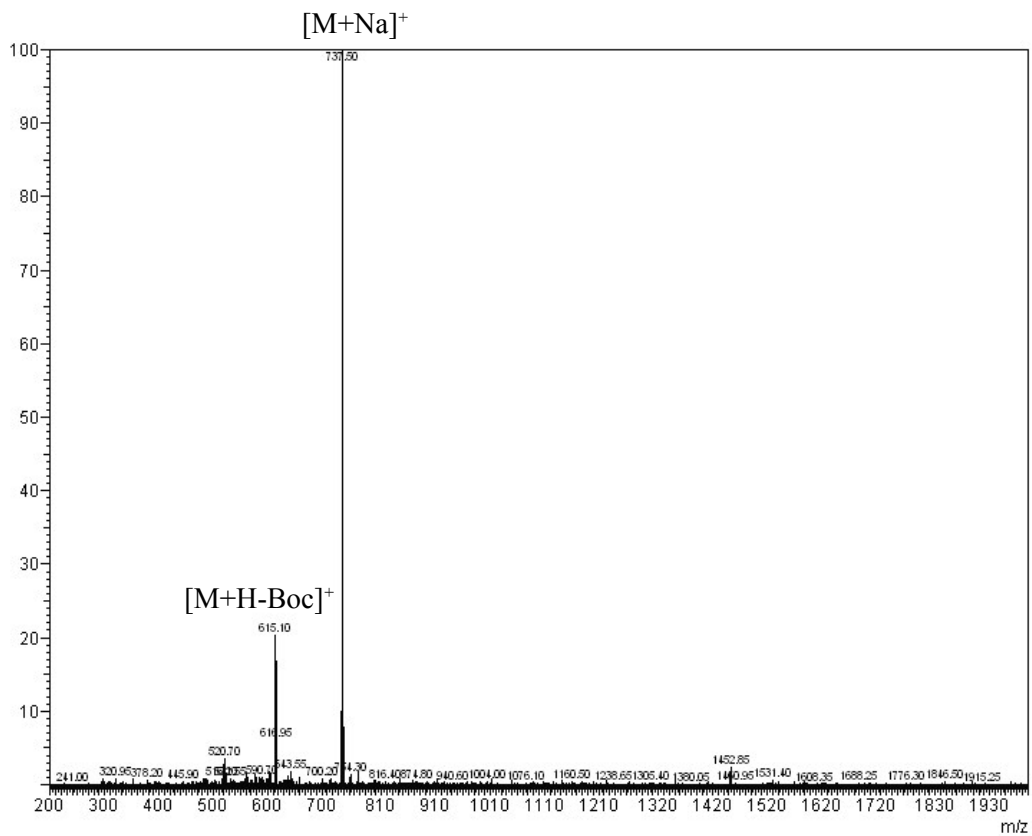

Compound 12:

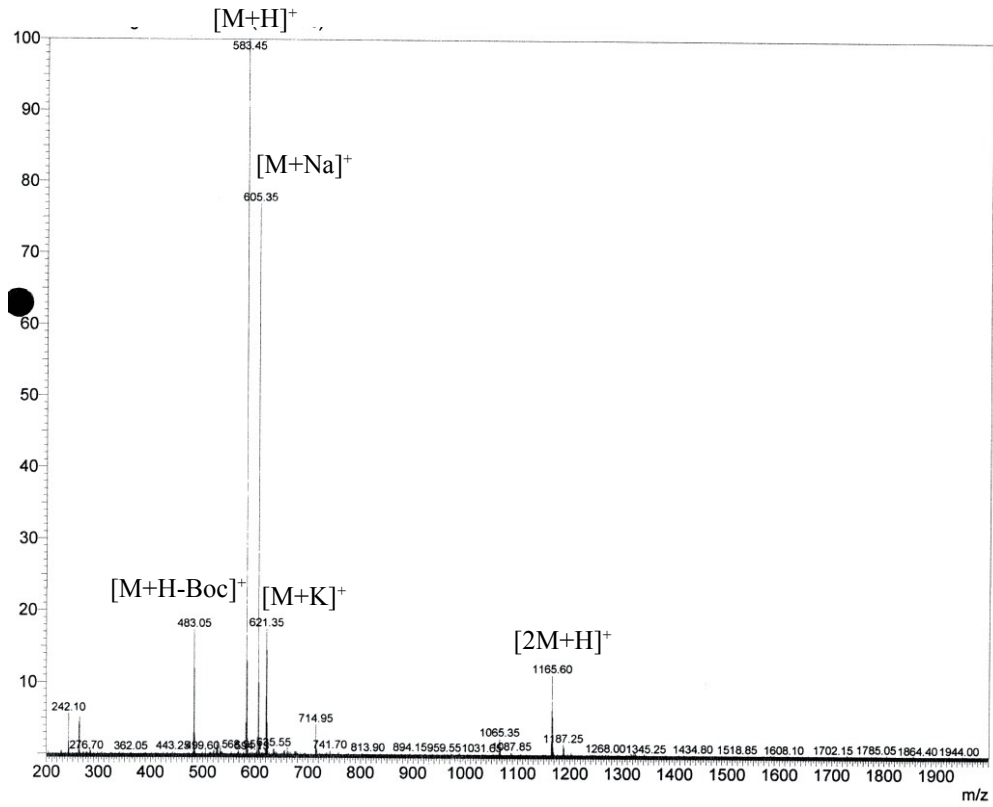

Compound 15:

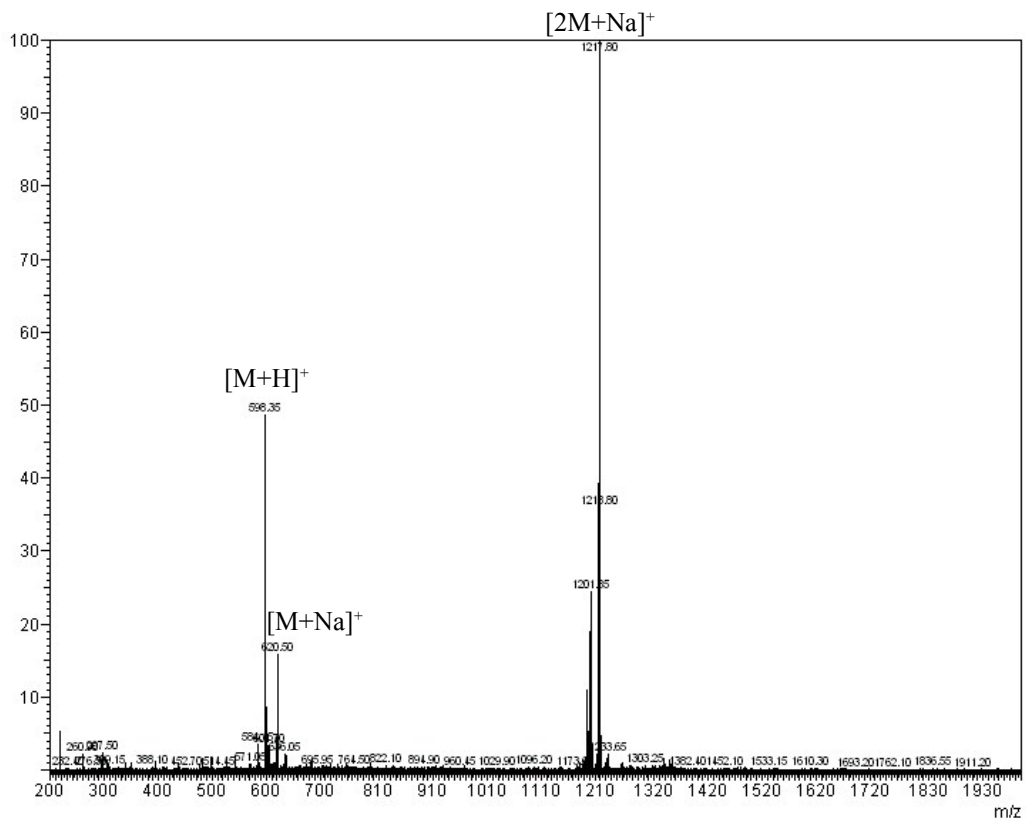



Compound 16:

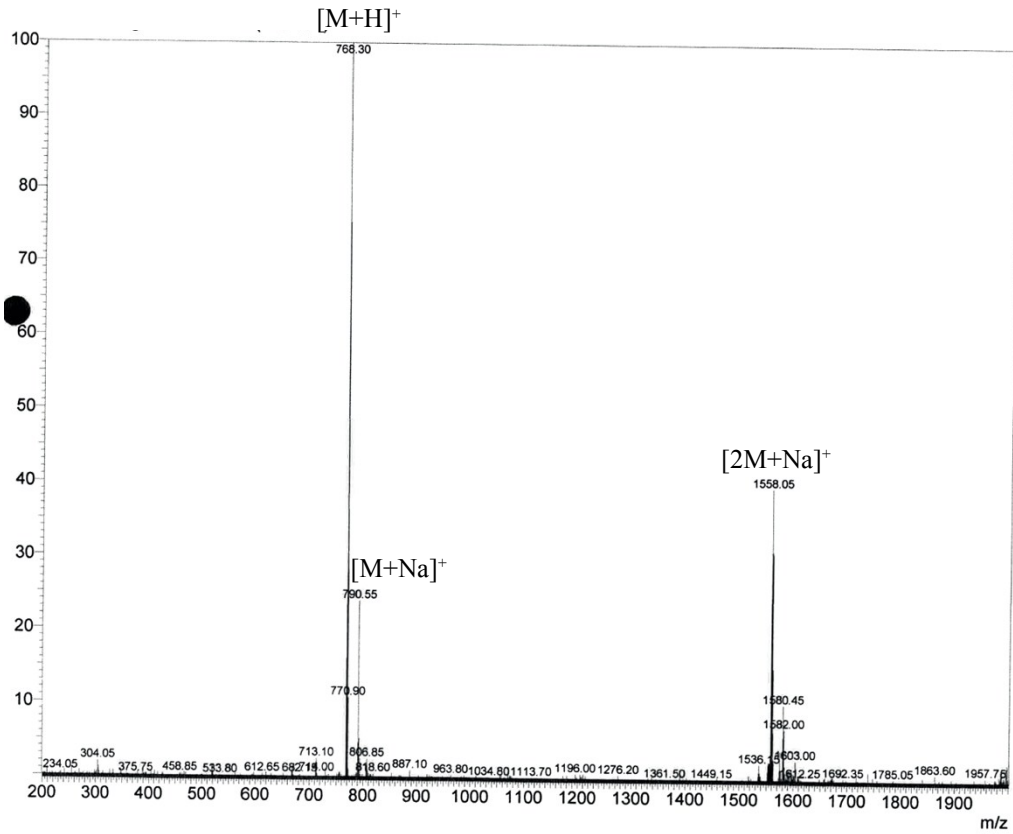

Precursor of Compound 16:

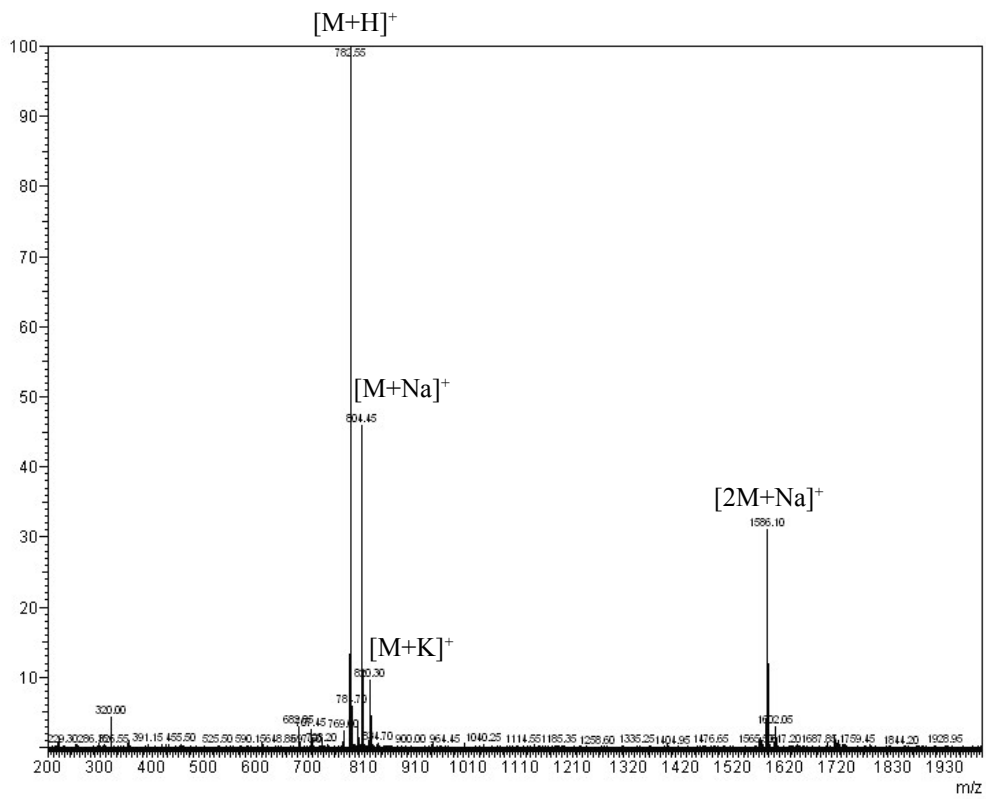

Compound 17:

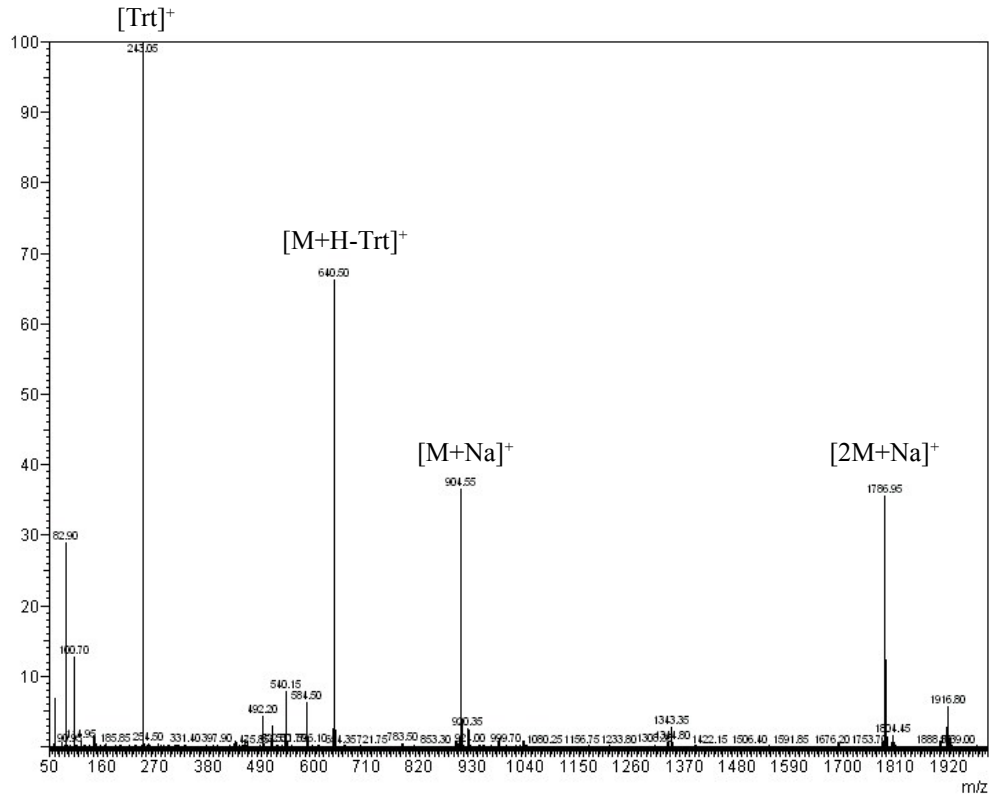

Compound 18:

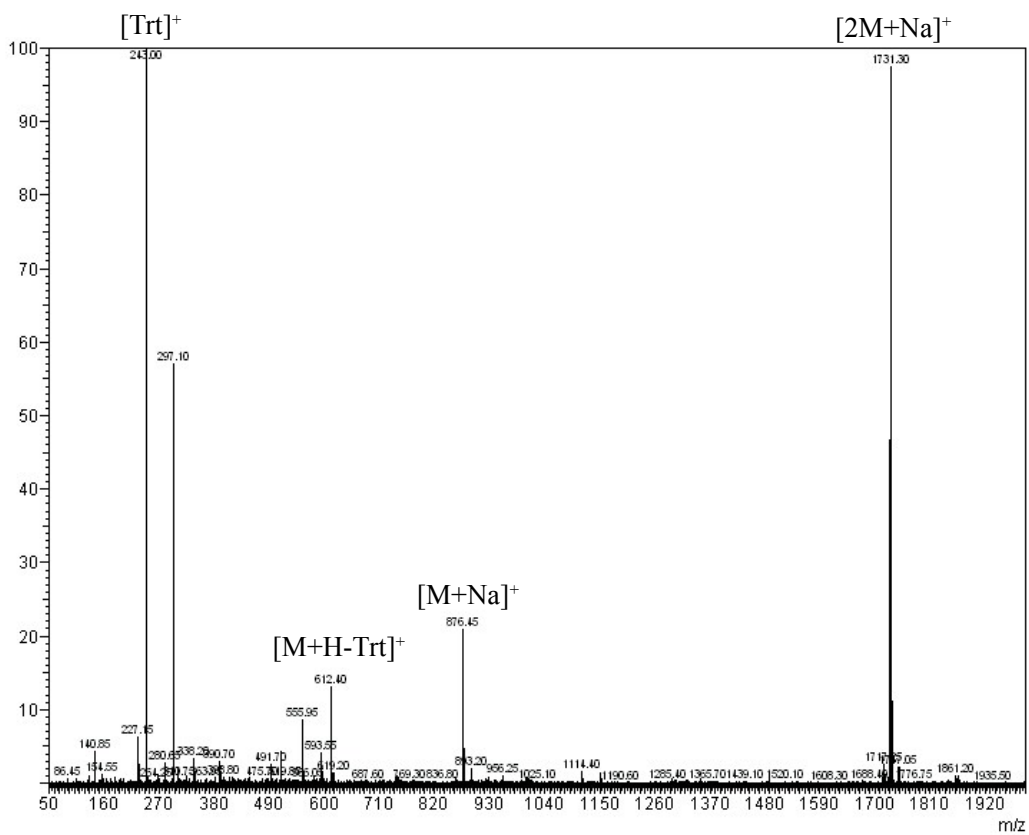

Compound 19:

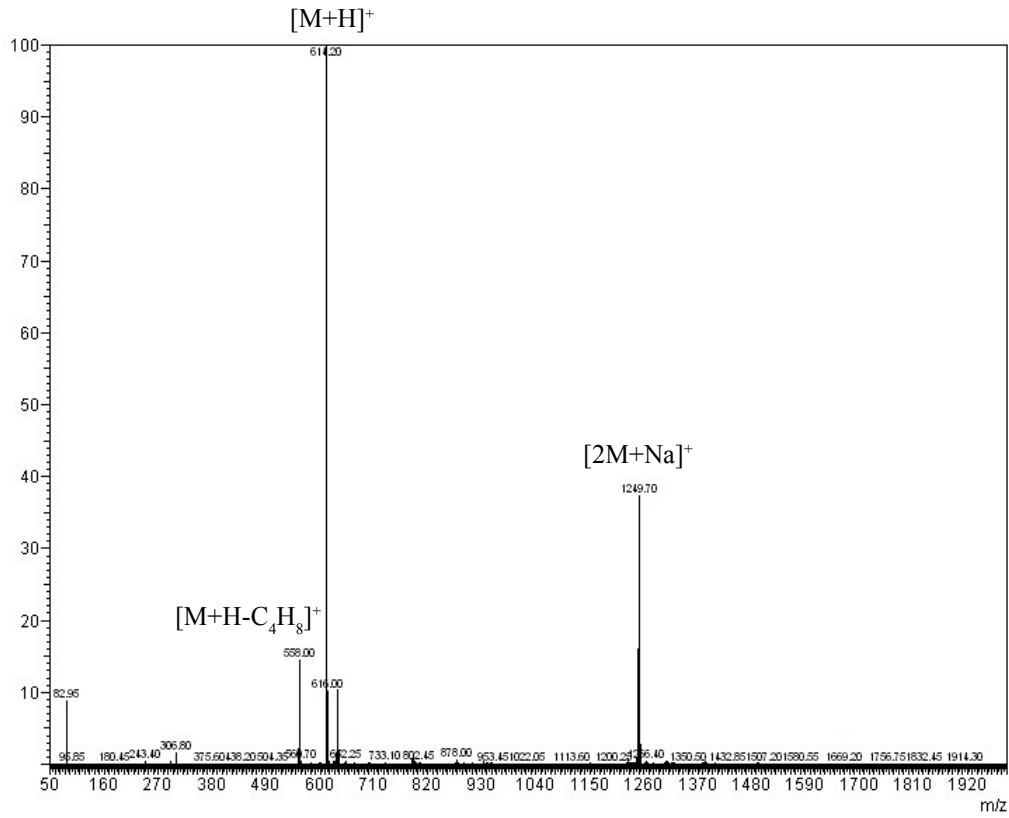

Compound 20:

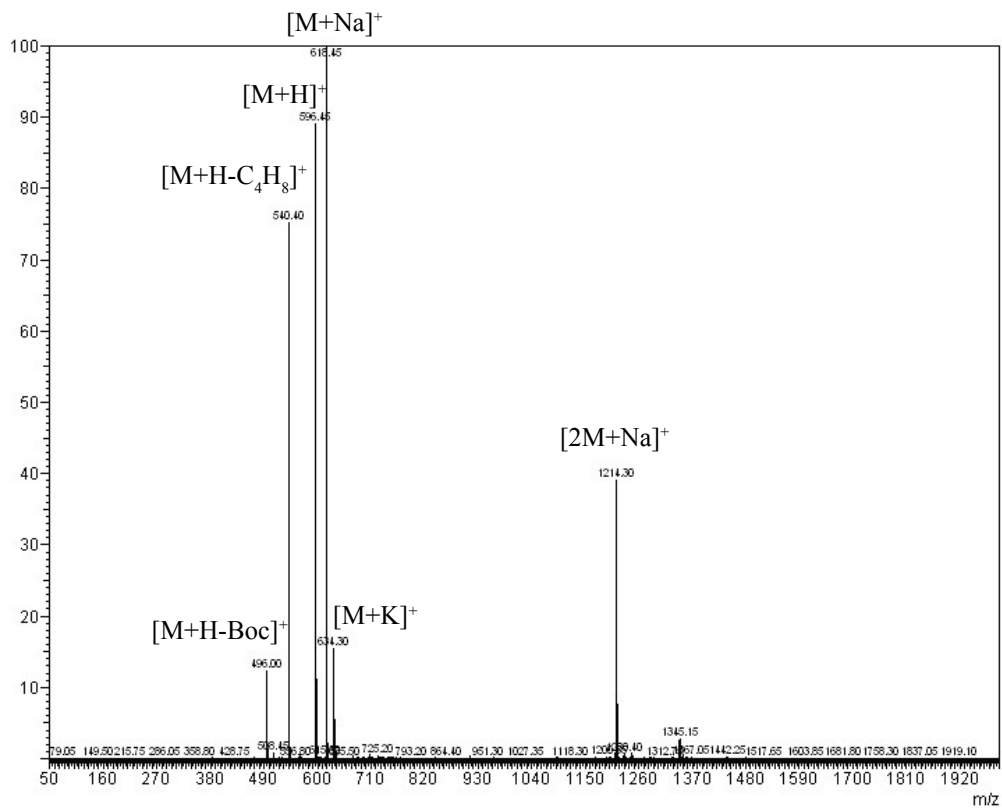

Compound 21:

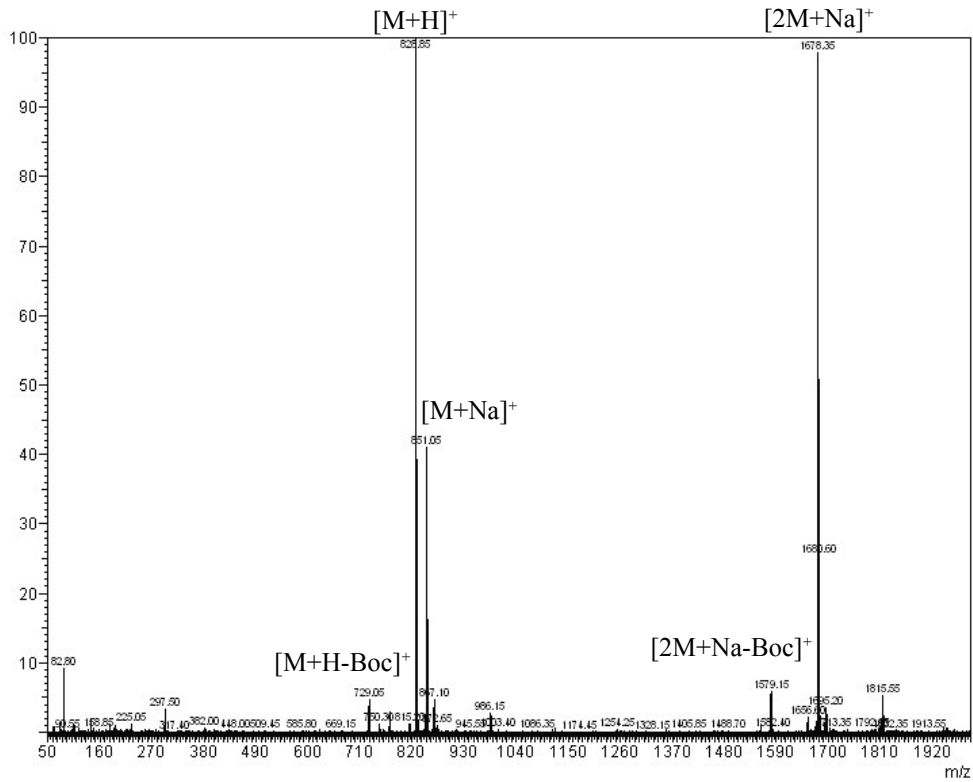

Compound 23:

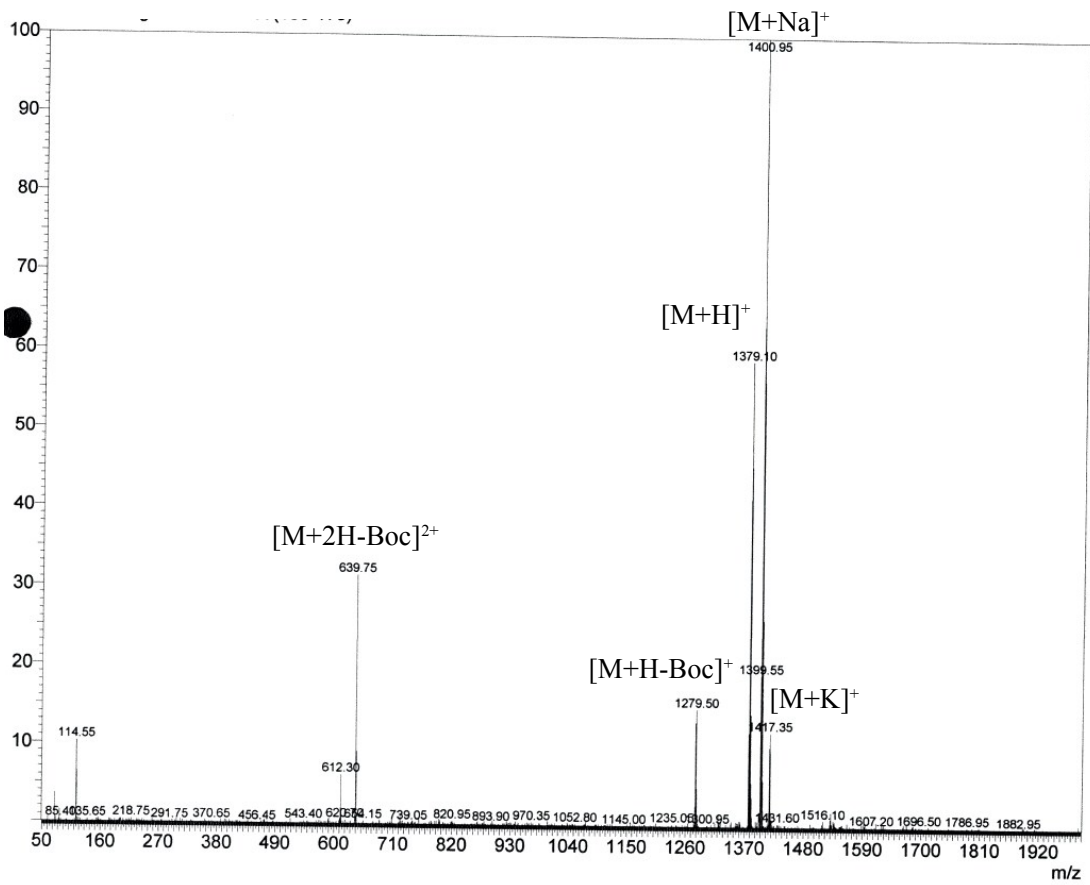

Compound 24:

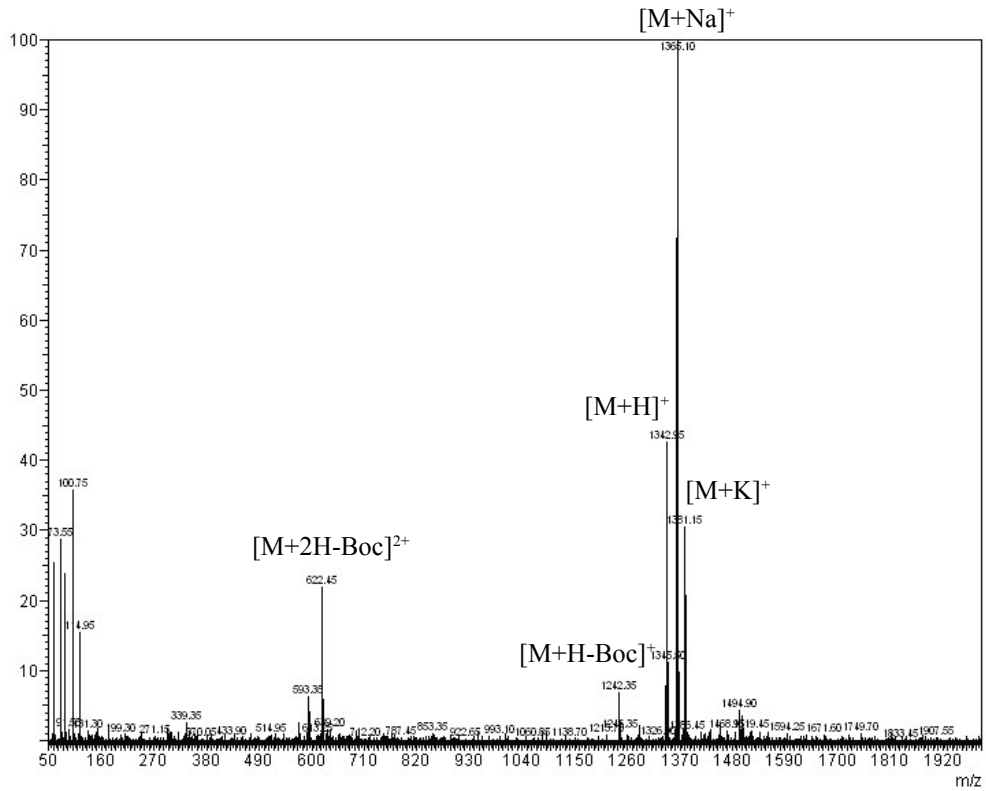

Compound 25:

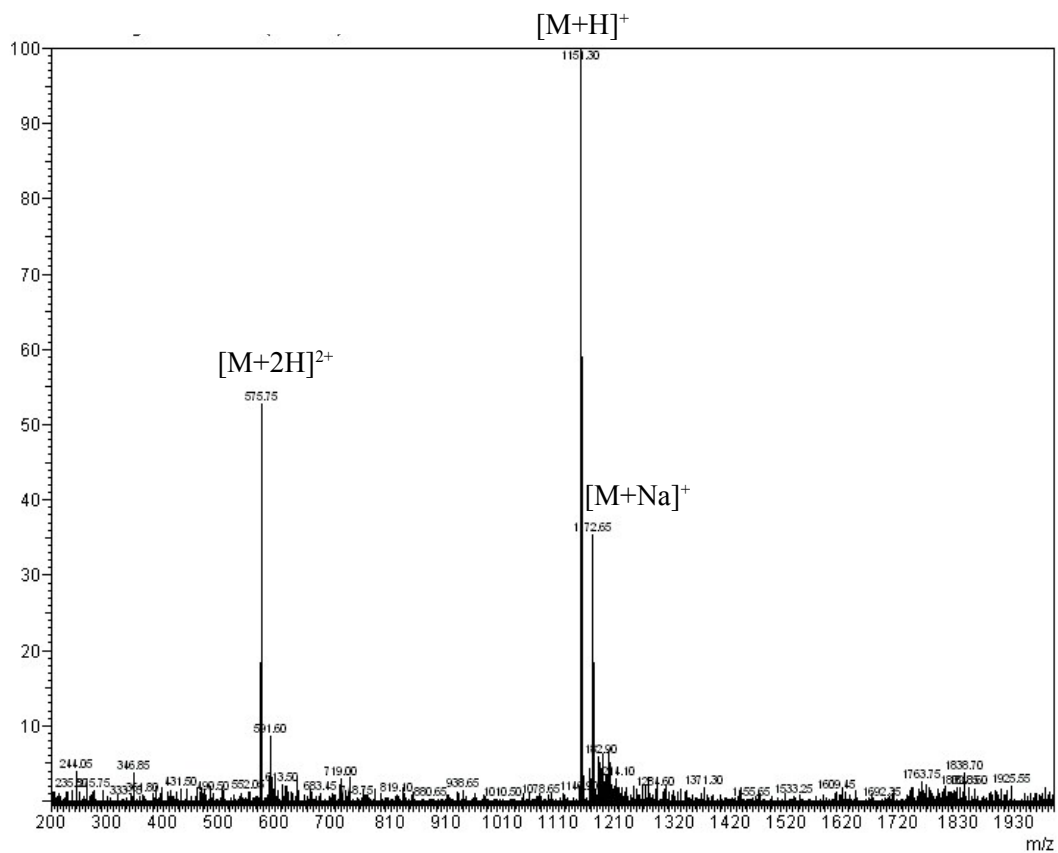

### 5. LCMS Spectra of Compounds 4-6, 8, and 9.

Compound 4:  $R_t = 30.74$  min (on a Maisch ReproSil 120 C18-AQ column (pore size: 120 Å, particle size: 5 µm, 250 × 4.6 mm) at a flow rate of 1 mL/min (from 100% buffer A (0.1% TFA in CH<sub>3</sub>CN/H<sub>2</sub>O 5:95 v/v) to 100% buffer B (0.1% TFA in CH<sub>3</sub>CN/H<sub>2</sub>O 95:5 v/v) in 48 min)

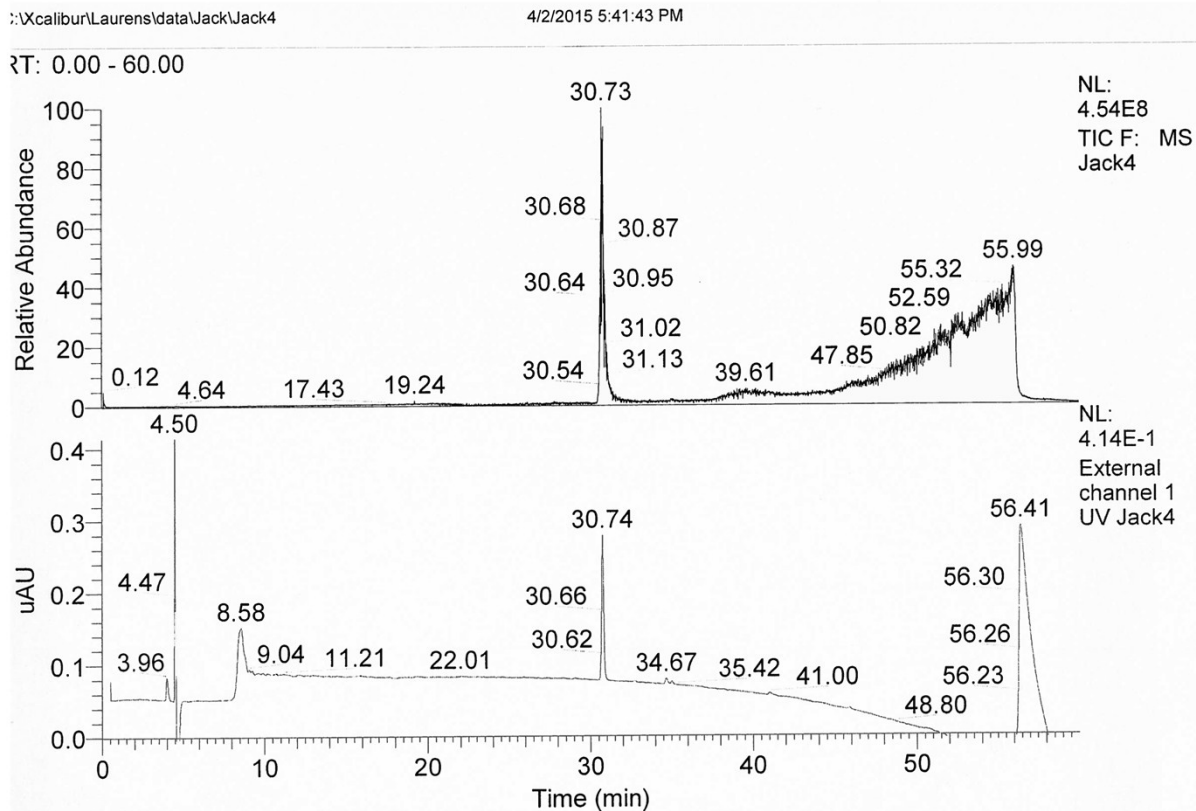

Jack4 #3236-3273 RT: 30.54-30.87 AV: 38 NL: 7.29E7  
[+ c ESI Full ms [ 50.00-2000.00]

*Compound 4*

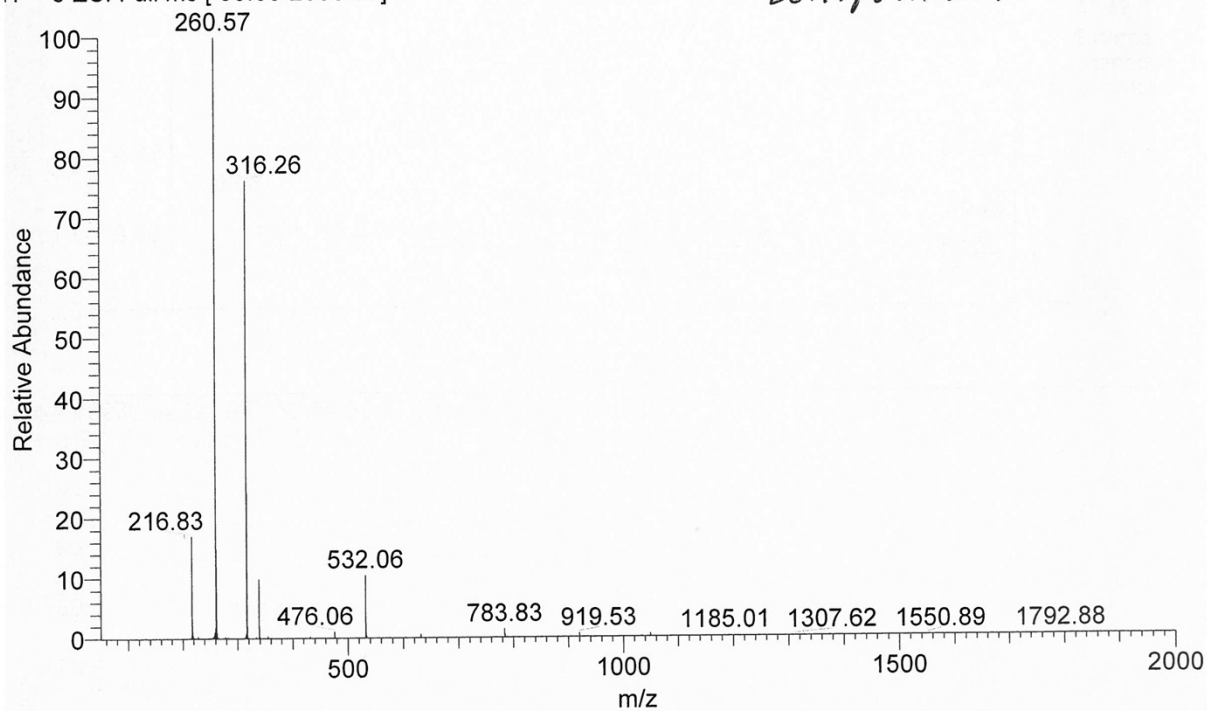

Compound 5:  $R_t = 26.15$  min

\\Xcalibur\Laurens\data\Jack\Jack5

4/2/2015 6:43:24 PM

RT: 0.00 - 60.00

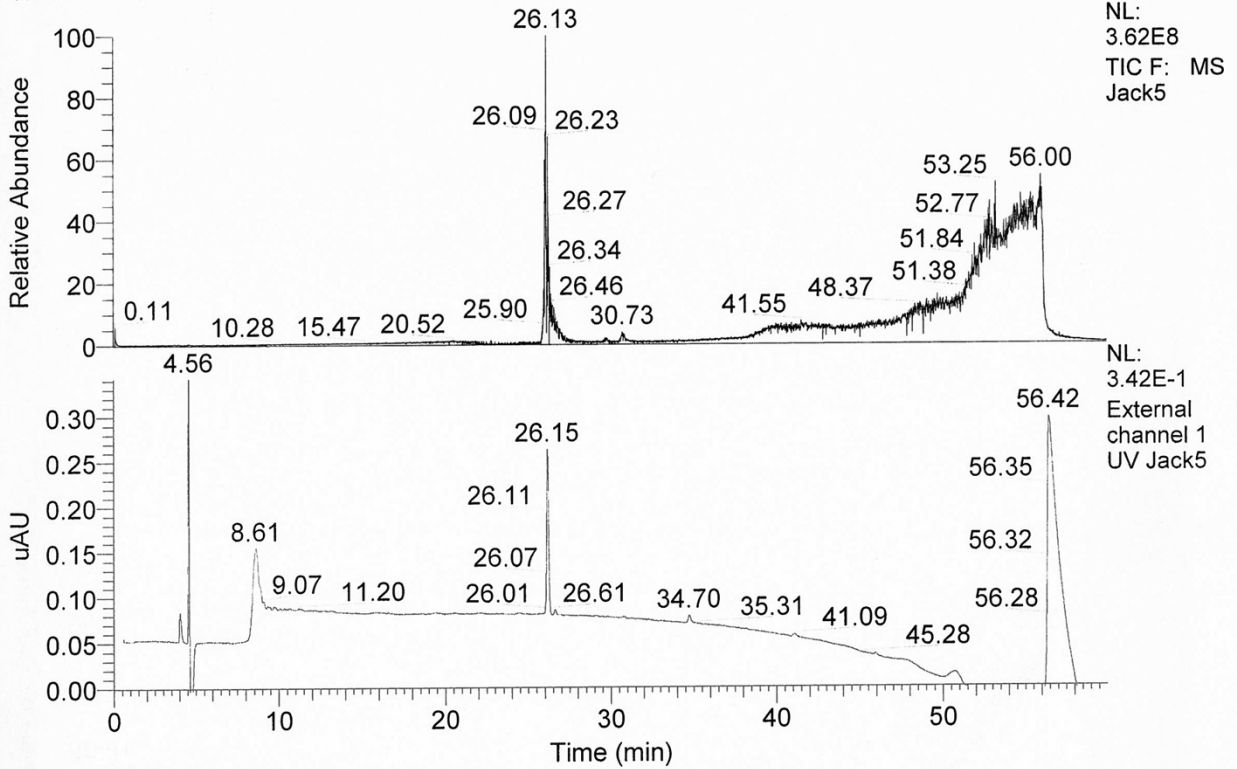

Jack5 #2783 RT: 26.15 AV: 1 NL: 2.81E7  
[+ c ESI Full ms [ 50.00-2000.00]]

*Compound 5*

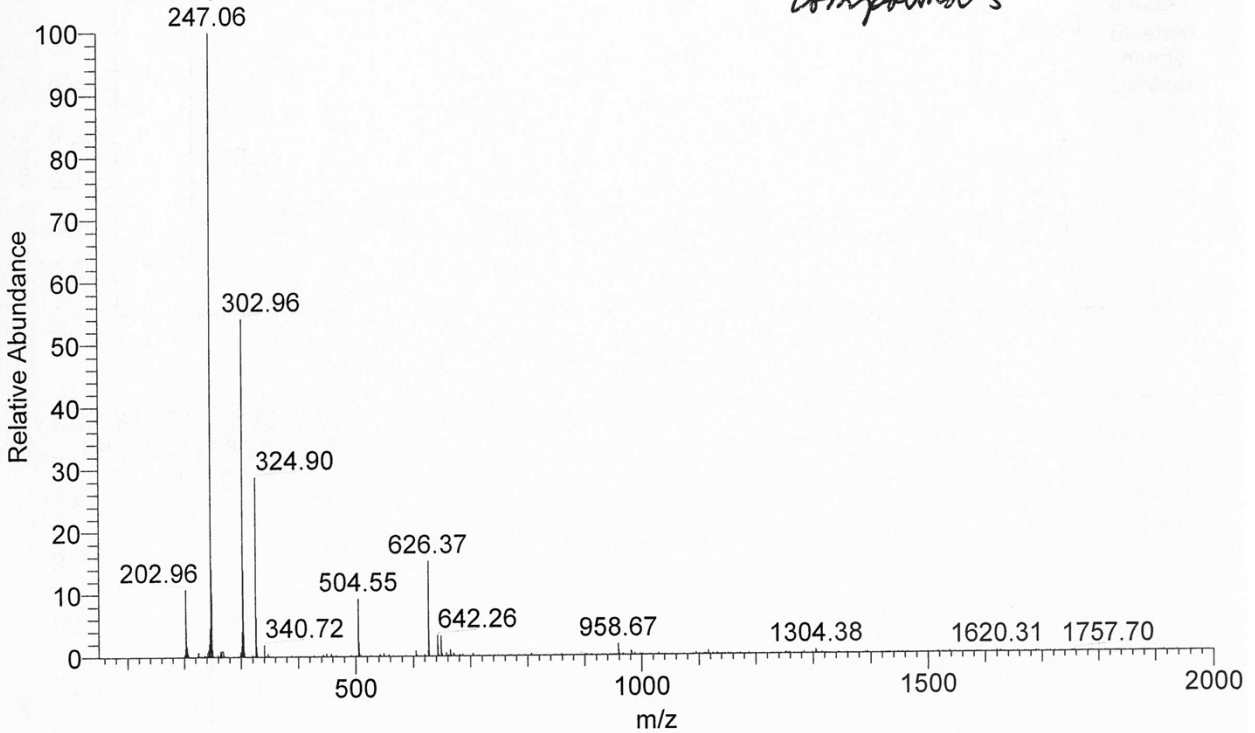

Compound 6:  $R_t = 28.08$  min

\\Xcalibur\Laurens\data\Jack\Jack6

4/2/2015 7:45:00 PM

RT: 0.00 - 60.00

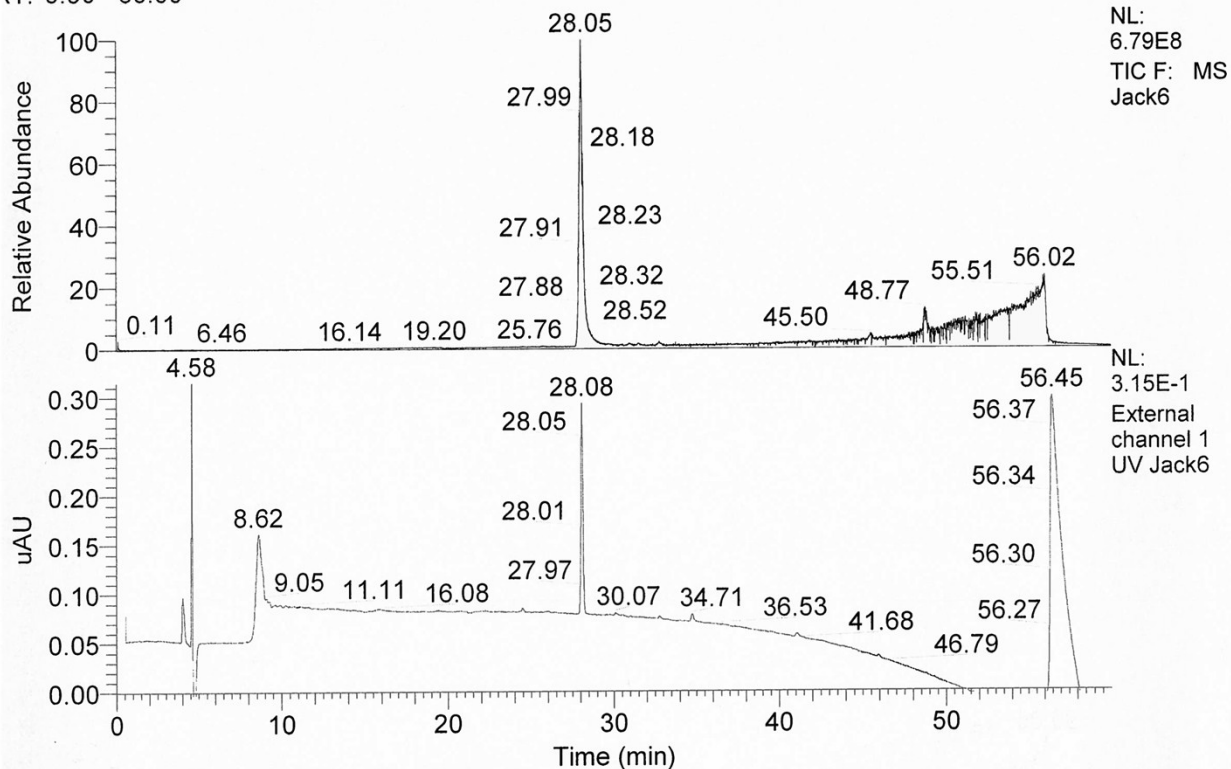

Jack6 #2966 RT: 28.05 AV: 1 NL: 2.48E8

[+ c ESI Full ms [ 50.00-2000.00]

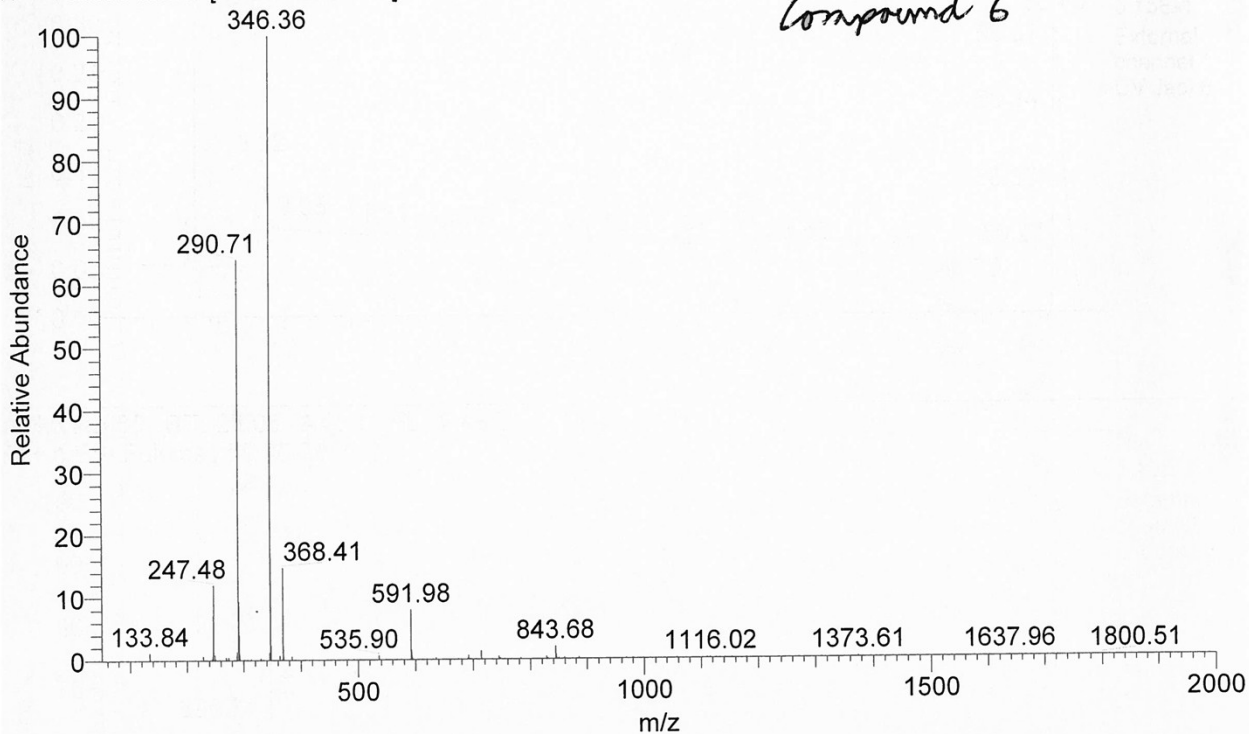



Compound 8:  $R_t = 27.23$  min

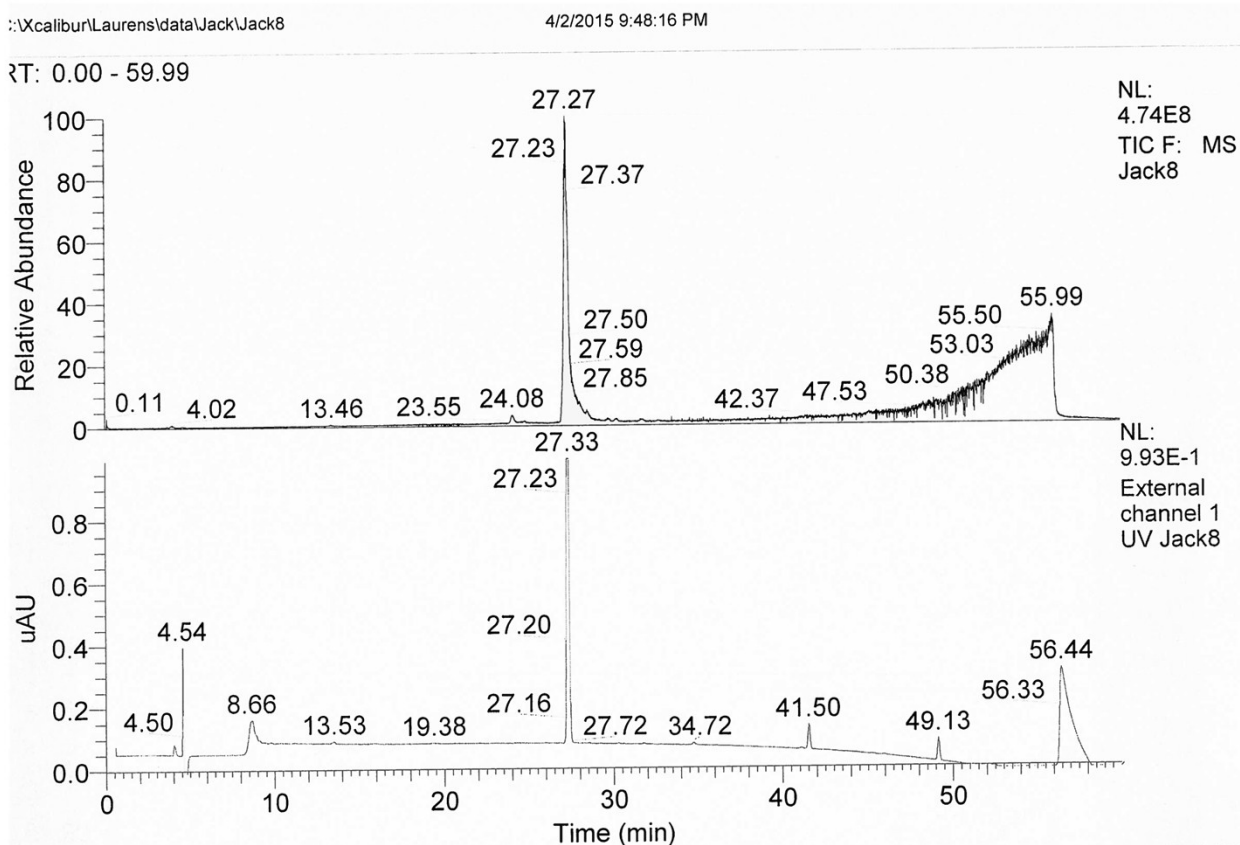

Jack8 #2875 RT: 27.29 AV: 1 NL: 1.61E8  
Γ: + c ESI Full ms [ 50.00-2000.00]

*Compound 8*

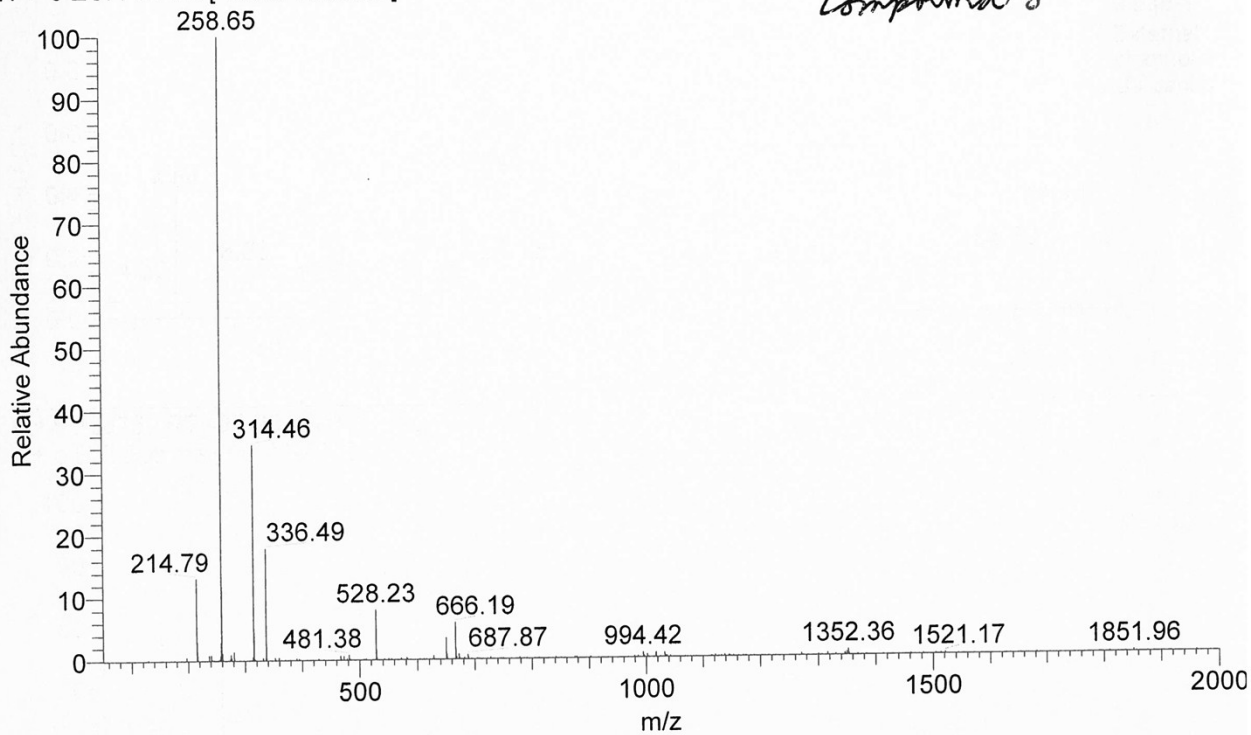

Compound 9:  $R_t = 24.60$  min

\\Xcalibur\Laurens\data\Jack\Jack9

4/2/2015 10:49:54 PM

RT: 0.00 - 59.99

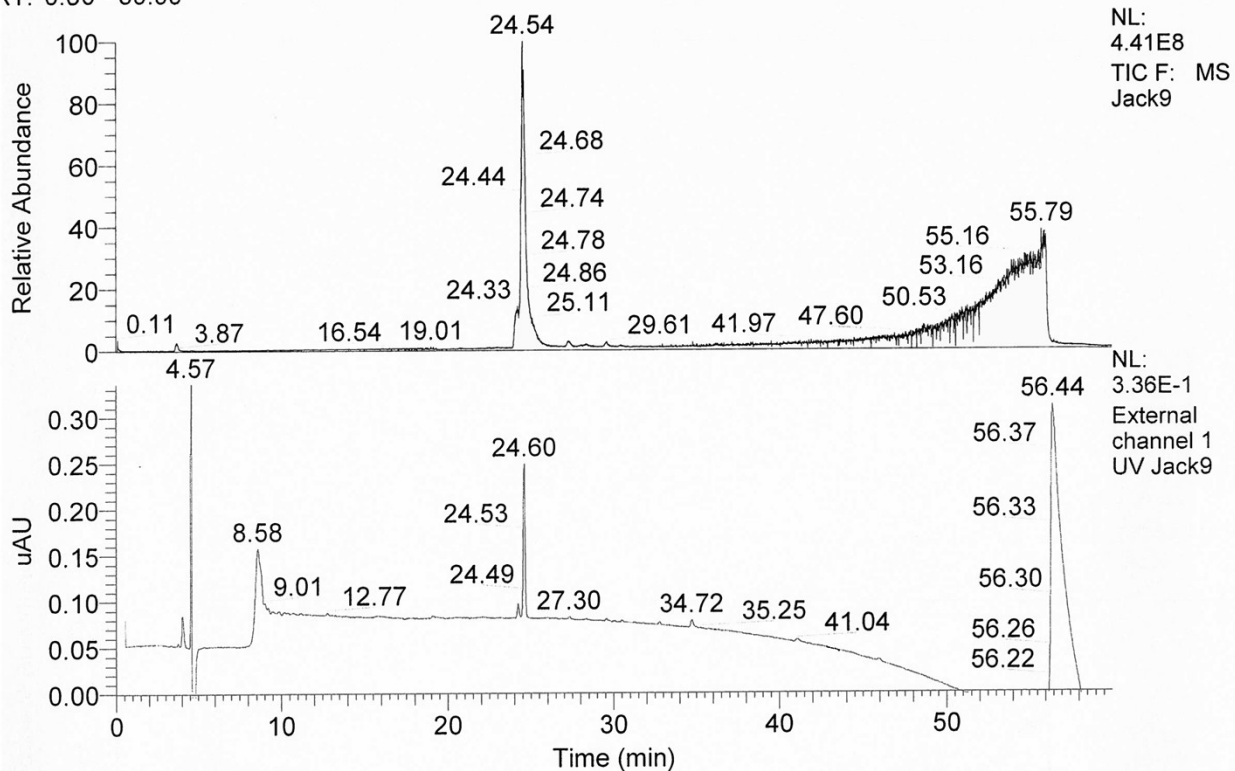

Jack9 #2605 RT: 24.55 AV: 1 NL: 1.33E8

[+ c ESI Full ms [ 50.00-2000.00]

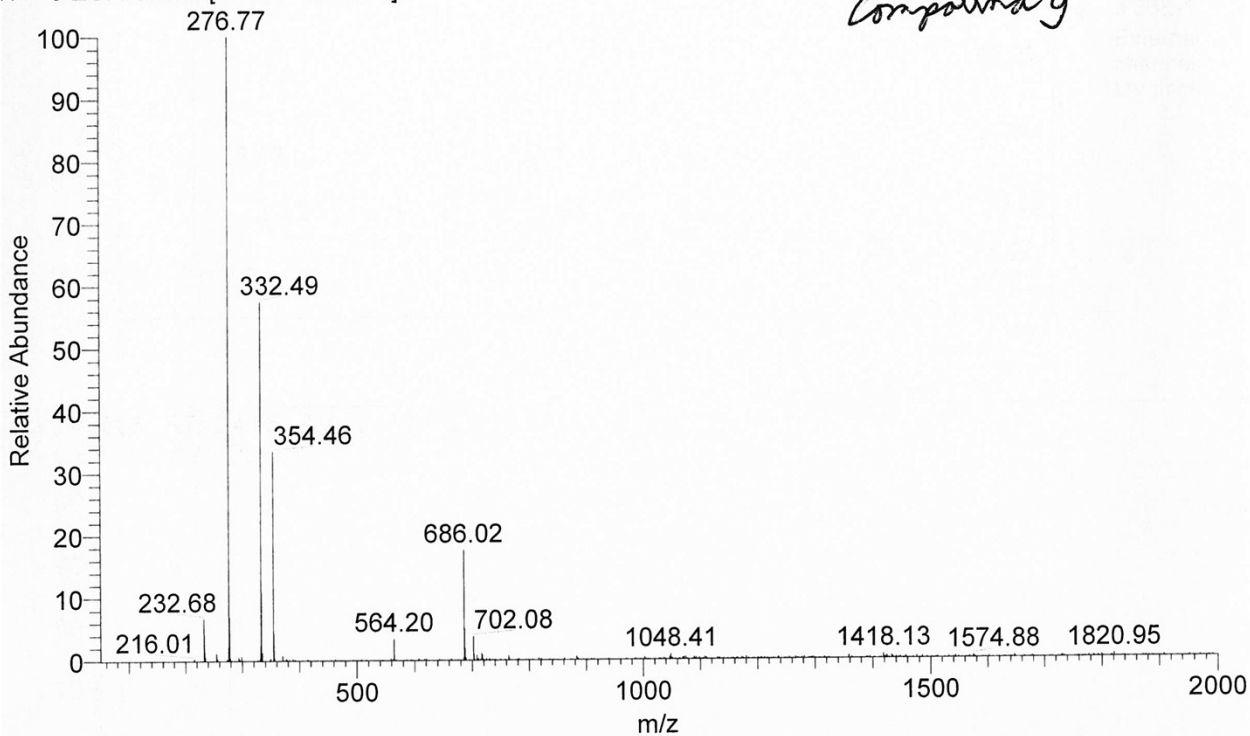

## 6. LCMS Spectra of Compounds 21A-B to monitor the dehydration reactions.

Reaction scheme:

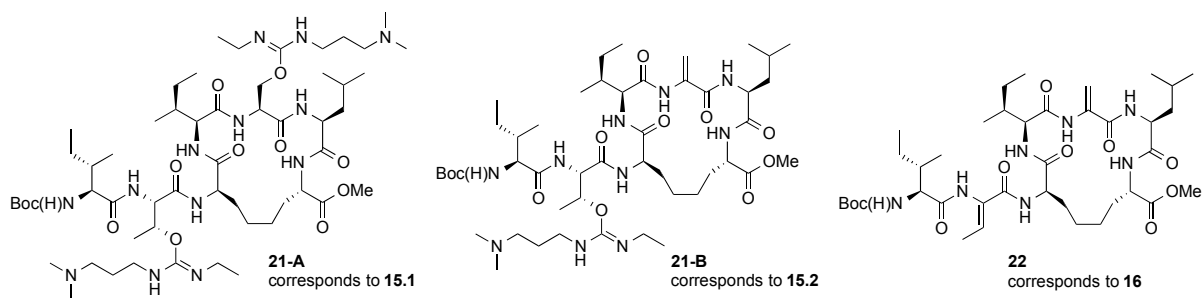

LCMS after 16 h of reaction:

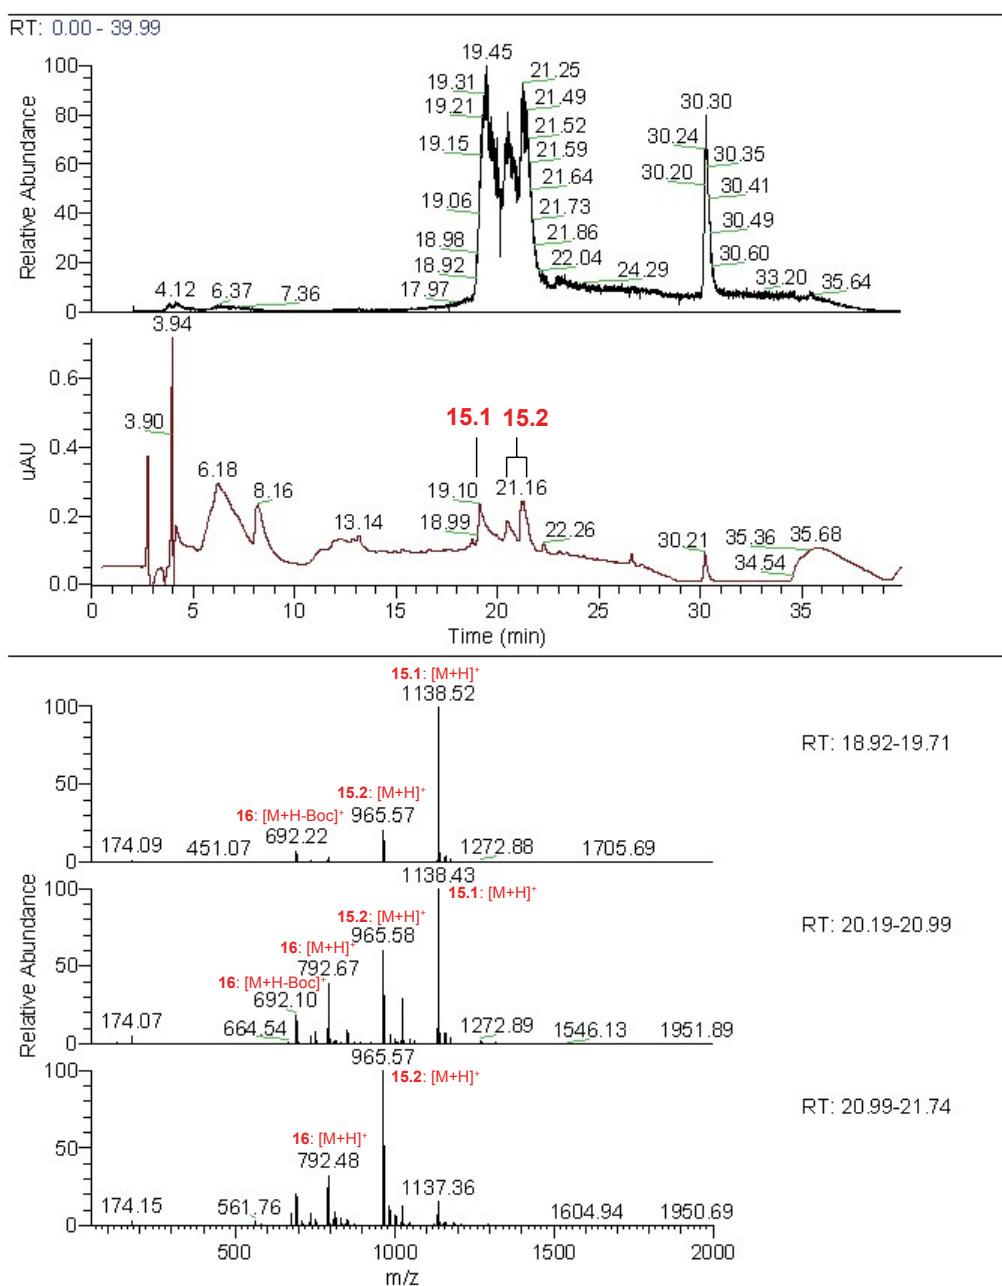

LCMS after 40 h of reaction:

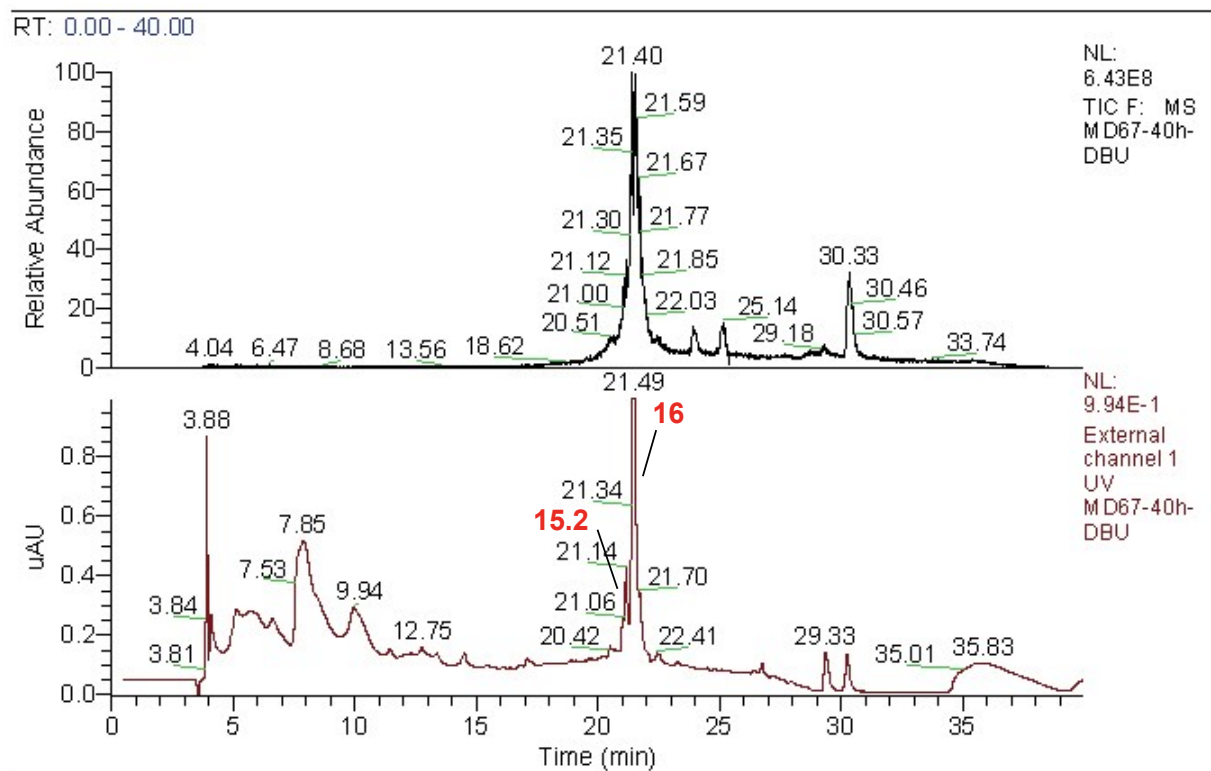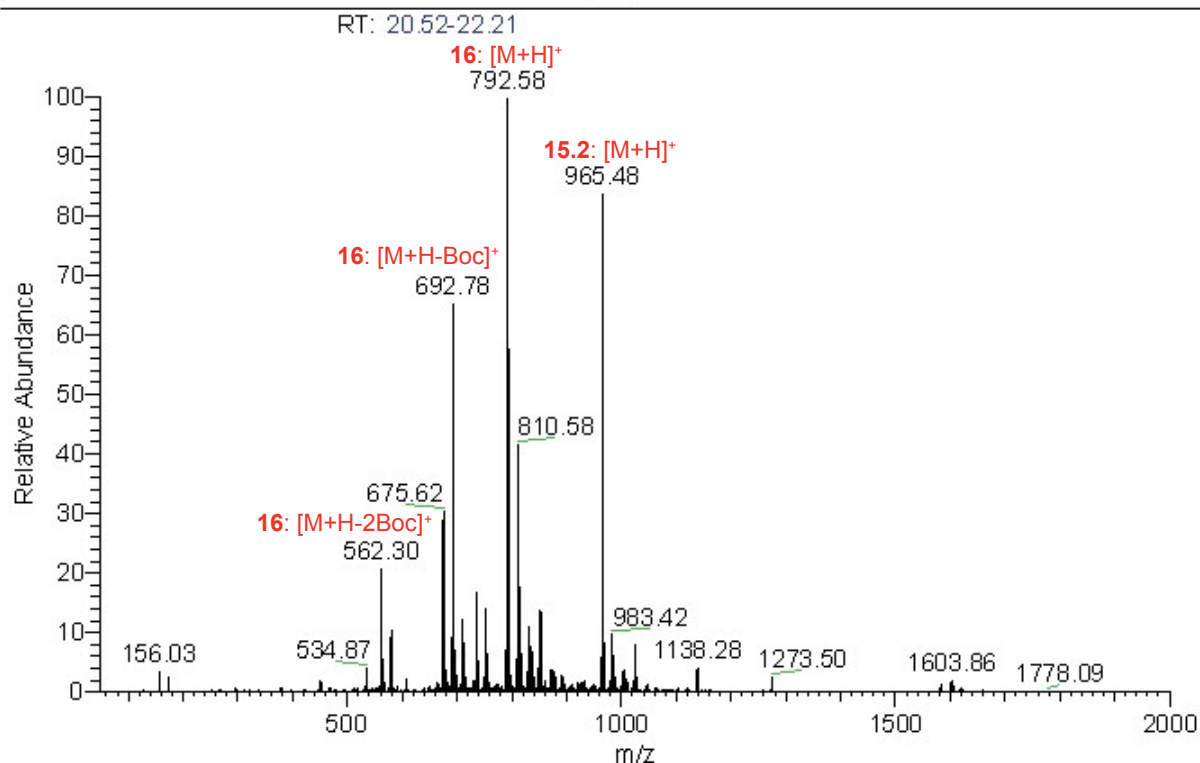

LCMS after 64 h of reaction:

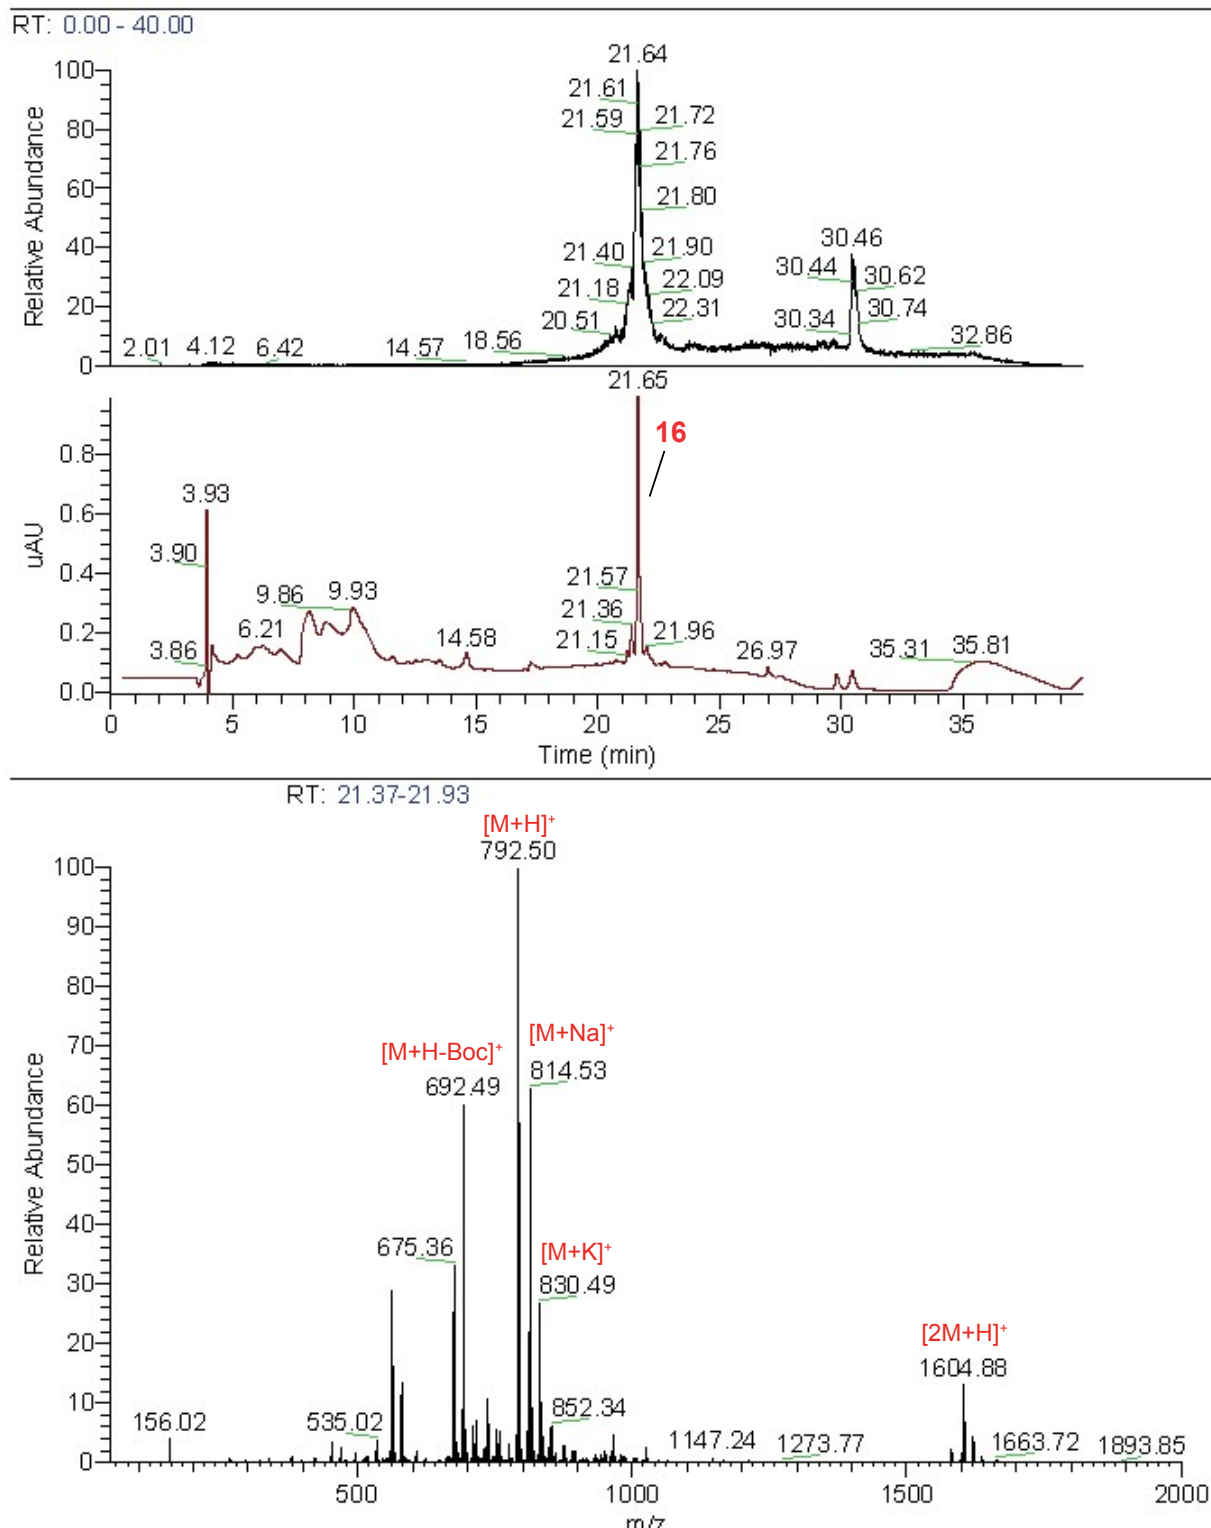

Supplement: c5ob00336a1.pdf [file c5ob00336a1.pdf]
